# Supplementary material
Source: MDPI journal article supplement (https://www.mdpi.com/1996-1073/10/7/925)
Supplement: s1 [file s1]

Archive with 4 entries (4 files):
- S2_Welte-etal_Integration_degradation_process_-_supplementary_results.pdf
- S1_Welte-etal_Integration_degradation_process_-_input_data.pdf
- S3_FINO1.txt
- S4_Heimdal.txt
