# Supplementary material
Source: MDPI journal article supplement (https://www.mdpi.com/1996-1073/10/7/925)
Supplement: s1 [file s1 › S3_FINO1.txt]

2004	1	1	1	0	0	8.268	0	0.89	0	0
2004	1	1	2	0	0	9.763	0	0.873	0	0
2004	1	1	3	0	0	11.562	0	0.84	0	0
2004	1	1	4	0	0	12.128	0	0.955	0	0
2004	1	1	5	0	0	13.457	0	1.147	0	0
2004	1	1	6	0	0	13.736	0	1.23	0	0
2004	1	1	7	0	0	14.852	0	1.34	0	0
2004	1	1	8	0	0	15.703	0	1.48	0	0
2004	1	1	9	0	0	15.804	0	1.53	0	0
2004	1	1	10	0	0	15.147	0	1.575	0	0
2004	1	1	11	0	0	15.61	0	1.523	0	0
2004	1	1	12	0	0	14.688	0	1.49	0	0
2004	1	1	13	0	0	14.09	0	1.505	0	0
2004	1	1	14	0	0	13.6	0	1.51	0	0
2004	1	1	15	0	0	13.774	0	1.52	0	0
2004	1	1	16	0	0	14.572	0	1.535	0	0
2004	1	1	17	0	0	14.956	0	1.497	0	0
2004	1	1	18	0	0	14.326	0	1.6	0	0
2004	1	1	19	0	0	14.272	0	1.755	0	0
2004	1	1	20	0	0	14.906	0	1.797	0	0
2004	1	1	21	0	0	15.178	0	1.8	0	0
2004	1	1	22	0	0	15.667	0	1.93	0	0
2004	1	1	23	0	0	15.037	0	1.863	0	0
2004	1	2	0	0	0	14.654	0	1.87	0	0
2004	1	2	1	0	0	14.655	0	1.925	0	0
2004	1	2	2	0	0	13.924	0	1.875	0	0
2004	1	2	3	0	0	13.47	0	1.85	0	0
2004	1	2	4	0	0	13.6	0	1.855	0	0
2004	1	2	5	0	0	14.1	0	1.773	0	0
2004	1	2	6	0	0	14.328	0	1.78	0	0
2004	1	2	7	0	0	12.842	0	1.775	0	0
2004	1	2	8	0	0	13.039	0	1.827	0	0
2004	1	2	9	0	0	11.248	0	1.66	0	0
2004	1	2	10	0	0	9.553	0	1.615	0	0
2004	1	2	11	0	0	8.89	0	1.3	0	0
2004	1	2	12	0	0	9.356	0	1.13	0	0
2004	1	2	13	0	0	9.778	0	1.06	0	0
2004	1	2	14	0	0	9.511	0	1.14	0	0
2004	1	2	15	0	0	8.678	0	1.3	0	0
2004	1	2	16	0	0	7.757	0	1.26	0	0
2004	1	2	17	0	0	7.409	0	1.133	0	0
2004	1	2	18	0	0	6.326	0	1.07	0	0
2004	1	2	19	0	0	6.288	0	1.03	0	0
2004	1	2	20	0	0	7.07	0	0.947	0	0
2004	1	2	21	0	0	7.102	0	0.95	0	0
2004	1	2	22	0	0	6.432	0	0.945	0	0
2004	1	2	23	0	0	6.579	0	0.96	0	0
2004	1	3	0	0	0	6.112	0	0.974	0	0
2004	1	3	1	0	0	6.323	0	0.988	0	0
2004	1	3	2	0	0	6.369	0	0.993	0	0
2004	1	3	3	0	0	6.256	0	0.98	0	0
2004	1	3	4	0	0	5.637	0	0.915	0	0
2004	1	3	5	0	0	5.176	0	0.897	0	0
2004	1	3	6	0	0	6.096	0	0.92	0	0
2004	1	3	7	0	0	6.9	0	0.925	0	0
2004	1	3	8	0	0	8.004	0	0.887	0	0
2004	1	3	9	0	0	8.222	0	0.88	0	0
2004	1	3	10	0	0	8.138	0	0.93	0	0
2004	1	3	11	0	0	7.486	0	0.89	0	0
2004	1	3	12	0	0	7.874	0	0.79	0	0
2004	1	3	13	0	0	7.848	0	0.74	0	0
2004	1	3	14	0	0	8.427	0	0.71	0	0
2004	1	3	15	0	0	9.502	0	0.761	0	0
2004	1	3	16	0	0	9.295	0	0.83	0	0
2004	1	3	17	0	0	10.161	0	0.857	0	0
2004	1	3	18	0	0	8.534	0	0.88	0	0
2004	1	3	19	0	0	8.077	0	0.965	0	0
2004	1	3	20	0	0	9.749	0	0.893	0	0
2004	1	3	21	0	0	11.582	0	0.88	0	0
2004	1	3	22	0	0	11.577	0	1.005	0	0
2004	1	3	23	0	0	12.661	0	1.227	0	0
2004	1	4	0	0	0	13.458	0	1.4	0	0
2004	1	4	1	0	0	14.445	0	1.515	0	0
2004	1	4	2	0	0	14.136	0	1.55	0	0
2004	1	4	3	0	0	13.272	0	1.53	0	0
2004	1	4	4	0	0	12.783	0	1.645	0	0
2004	1	4	5	0	0	13.021	0	1.86	0	0
2004	1	4	6	0	0	12.478	0	2.02	0	0
2004	1	4	7	0	0	11.222	0	2.01	0	0
2004	1	4	8	0	0	9.867	0	1.867	0	0
2004	1	4	9	0	0	12.768	0	1.8	0	0
2004	1	4	10	0	0	12.213	0	1.61	0	0
2004	1	4	11	0	0	12.823	0	1.6	0	0
2004	1	4	12	0	0	13.186	0	1.64	0	0
2004	1	4	13	0	0	13.715	0	1.825	0	0
2004	1	4	14	0	0	14.461	0	1.973	0	0
2004	1	4	15	0	0	14.786	0	2.16	0	0
2004	1	4	16	0	0	15.247	0	2.465	0	0
2004	1	4	17	0	0	16.323	0	2.78	0	0
2004	1	4	18	0	0	15.608	0	2.88	0	0
2004	1	4	19	0	0	16.062	0	2.885	0	0
2004	1	4	20	0	0	15.144	0	3.107	0	0
2004	1	4	21	0	0	13.612	0	3.06	0	0
2004	1	4	22	0	0	9.385	0	3.02	0	0
2004	1	4	23	0	0	4.45	0	2.563	0	0
2004	1	5	0	0	0	3.298	0	2.26	0	0
2004	1	5	1	0	0	1.78	0	2.16	0	0
2004	1	5	2	0	0	2.477	0	1.91	0	0
2004	1	5	3	0	0	3.468	0	1.75	0	0
2004	1	5	4	0	0	4.728	0	1.595	0	0
2004	1	5	5	0	0	5.926	0	1.503	0	0
2004	1	5	6	0	0	5.732	0	1.42	0	0
2004	1	5	7	0	0	6.528	0	1.355	0	0
2004	1	5	8	0	0	7.859	0	1.277	0	0
2004	1	5	9	0	0	7.724	0	1.13	0	0
2004	1	5	10	0	0	7.942	0	1.14	0	0
2004	1	5	11	0	0	8.317	0	1.147	0	0
2004	1	5	12	0	0	8.498	0	1.09	0	0
2004	1	5	13	0	0	7.95	0	1.035	0	0
2004	1	5	14	0	0	8.45	0	0.99	0	0
2004	1	5	15	0	0	8.928	0	0.97	0	0
2004	1	5	16	0	0	9.678	0	0.905	0	0
2004	1	5	17	0	0	10.299	0	0.91	0	0
2004	1	5	18	0	0	10.94	0	0.99	0	0
2004	1	5	19	0	0	11.628	0	1.095	0	0
2004	1	5	20	0	0	11.981	0	1.19	0	0
2004	1	5	21	0	0	12.584	0	1.29	0	0
2004	1	5	22	0	0	12.187	0	1.375	0	0
2004	1	5	23	0	0	11.837	0	1.29	0	0
2004	1	6	0	0	0	12.366	0	1.23	0	0
2004	1	6	1	0	0	12.625	0	1.305	0	0
2004	1	6	2	0	0	13.086	0	1.237	0	0
2004	1	6	3	0	0	12.784	0	1.37	0	0
2004	1	6	4	0	0	12.608	0	1.275	0	0
2004	1	6	5	0	0	13.113	0	1.29	0	0
2004	1	6	6	0	0	13.598	0	1.36	0	0
2004	1	6	7	0	0	12.787	0	1.375	0	0
2004	1	6	8	0	0	13.154	0	1.39	0	0
2004	1	6	9	0	0	13.938	0	1.32	0	0
2004	1	6	10	0	0	13.728	0	1.375	0	0
2004	1	6	11	0	0	14.219	0	1.253	0	0
2004	1	6	12	0	0	15.066	0	1.2	0	0
2004	1	6	13	0	0	15.282	0	1.325	0	0
2004	1	6	14	0	0	15.554	0	1.353	0	0
2004	1	6	15	0	0	15.994	0	1.41	0	0
2004	1	6	16	0	0	14.043	0	1.45	0	0
2004	1	6	17	0	0	14.137	0	1.447	0	0
2004	1	6	18	0	0	14.002	0	1.46	0	0
2004	1	6	19	0	0	12.868	0	1.415	0	0
2004	1	6	20	0	0	13.09	0	1.487	0	0
2004	1	6	21	0	0	13.956	0	1.57	0	0
2004	1	6	22	0	0	14.028	0	1.47	0	0
2004	1	6	23	0	0	13.724	0	1.39	0	0
2004	1	7	0	0	0	12.692	0	1.42	0	0
2004	1	7	1	0	0	11.845	0	1.54	0	0
2004	1	7	2	0	0	11.849	0	1.503	0	0
2004	1	7	3	0	0	12.098	0	1.47	0	0
2004	1	7	4	0	0	10.887	0	1.545	0	0
2004	1	7	5	0	0	10.696	0	1.553	0	0
2004	1	7	6	0	0	10.538	0	1.69	0	0
2004	1	7	7	0	0	9.713	0	1.565	0	0
2004	1	7	8	0	0	8.416	0	1.643	0	0
2004	1	7	9	0	0	8.98	0	1.76	0	0
2004	1	7	10	0	0	8.81	0	1.67	0	0
2004	1	7	11	0	0	8.847	0	1.603	0	0
2004	1	7	12	0	0	8.774	0	1.57	0	0
2004	1	7	13	0	0	8.012	0	1.402	0	0
2004	1	7	14	0	0	5.496	0	1.26	0	0
2004	1	7	15	0	0	6.676	0	1.33	0	0
2004	1	7	16	0	0	7.028	0	1.28	0	0
2004	1	7	17	0	0	7.896	0	1.26	0	0
2004	1	7	18	0	0	8.082	0	1.18	0	0
2004	1	7	19	0	0	8.845	0	1.205	0	0
2004	1	7	20	0	0	8.774	0	1.207	0	0
2004	1	7	21	0	0	9.066	0	1.07	0	0
2004	1	7	22	0	0	9.077	0	1.09	0	0
2004	1	7	23	0	0	9.29	0	0.993	0	0
2004	1	8	0	0	0	9.888	0	0.96	0	0
2004	1	8	1	0	0	11.237	0	0.885	0	0
2004	1	8	2	0	0	10.461	0	0.867	0	0
2004	1	8	3	0	0	10.686	0	0.86	0	0
2004	1	8	4	0	0	10.997	0	0.85	0	0
2004	1	8	5	0	0	10.787	0	0.853	0	0
2004	1	8	6	0	0	11.87	0	0.79	0	0
2004	1	8	7	0	0	12.472	0	0.775	0	0
2004	1	8	8	0	0	14.373	0	0.913	0	0
2004	1	8	9	0	0	14.98	0	1.16	0	0
2004	1	8	10	0	0	14.88	0	1.39	0	0
2004	1	8	11	0	0	15.51	0	1.557	0	0
2004	1	8	12	0	0	15.618	0	1.68	0	0
2004	1	8	13	0	0	15.582	0	1.685	0	0
2004	1	8	14	0	0	16.561	0	1.617	0	0
2004	1	8	15	0	0	17.328	0	1.62	0	0
2004	1	8	16	0	0	17.49	0	1.505	0	0
2004	1	8	17	0	0	17.269	0	1.455	0	0
2004	1	8	18	0	0	17.072	0	1.39	0	0
2004	1	8	19	0	0	17.203	0	1.47	0	0
2004	1	8	20	0	0	15.709	0	1.587	0	0
2004	1	8	21	0	0	15.076	0	1.7	0	0
2004	1	8	22	0	0	13.507	0	1.62	0	0
2004	1	8	23	0	0	12.399	0	1.583	0	0
2004	1	9	0	0	0	12.866	0	1.63	0	0
2004	1	9	1	0	0	11.602	0	1.49	0	0
2004	1	9	2	0	0	11.047	0	1.447	0	0
2004	1	9	3	0	0	11.314	0	1.3	0	0
2004	1	9	4	0	0	12.243	0	1.19	0	0
2004	1	9	5	0	0	12.201	0	1.103	0	0
2004	1	9	6	0	0	11.04	0	1.12	0	0
2004	1	9	7	0	0	10.618	0	1.09	0	0
2004	1	9	8	0	0	9.416	0	1.067	0	0
2004	1	9	9	0	0	9.218	0	1.02	0	0
2004	1	9	10	0	0	10.085	0	1.03	0	0
2004	1	9	11	0	0	10.189	0	1.03	0	0
2004	1	9	12	0	0	9.608	0	1.04	0	0
2004	1	9	13	0	0	8.783	0	1	0	0
2004	1	9	14	0	0	10.146	0	0.913	0	0
2004	1	9	15	0	0	10.104	0	0.83	0	0
2004	1	9	16	0	0	8.62	0	0.83	0	0
2004	1	9	17	0	0	6.697	0	0.777	0	0
2004	1	9	18	0	0	5.9	0	0.75	0	0
2004	1	9	19	0	0	6.078	0	0.72	0	0
2004	1	9	20	0	0	6.289	0	0.733	0	0
2004	1	9	21	0	0	5.052	0	0.73	0	0
2004	1	9	22	0	0	4.72	0	0.76	0	0
2004	1	9	23	0	0	6.436	0	0.707	0	0
2004	1	10	0	0	0	7.79	0	0.74	0	0
2004	1	10	1	0	0	7.73	0	0.745	0	0
2004	1	10	2	0	0	7.677	0	0.727	0	0
2004	1	10	3	0	0	6.768	0	0.77	0	0
2004	1	10	4	0	0	7.562	0	0.78	0	0
2004	1	10	5	0	0	8.431	0	0.78	0	0
2004	1	10	6	0	0	8.882	0	0.78	0	0
2004	1	10	7	0	0	10.313	0	0.775	0	0
2004	1	10	8	0	0	10.01	0	0.877	0	0
2004	1	10	9	0	0	7.762	0	1.03	0	0
2004	1	10	10	0	0	6.937	0	1.045	0	0
2004	1	10	11	0	0	7.449	0	1.083	0	0
2004	1	10	12	0	0	9.776	0	1.06	0	0
2004	1	10	13	0	0	8.725	0	1.02	0	0
2004	1	10	14	0	0	7.891	0	1.07	0	0
2004	1	10	15	0	0	9.484	0	1.04	0	0
2004	1	10	16	0	0	10.537	0	1.015	0	0
2004	1	10	17	0	0	11.283	0	1.01	0	0
2004	1	10	18	0	0	12.294	0	1.06	0	0
2004	1	10	19	0	0	12.575	0	1.07	0	0
2004	1	10	20	0	0	13.356	0	1.127	0	0
2004	1	10	21	0	0	13.418	0	1.19	0	0
2004	1	10	22	0	0	13.592	0	1.31	0	0
2004	1	10	23	0	0	13.386	0	1.473	0	0
2004	1	11	0	0	0	14.08	0	1.4	0	0
2004	1	11	1	0	0	13.535	0	1.485	0	0
2004	1	11	2	0	0	15.707	0	1.457	0	0
2004	1	11	3	0	0	16.834	0	1.42	0	0
2004	1	11	4	0	0	14.412	0	1.4	0	0
2004	1	11	5	0	0	17.459	0	1.533	0	0
2004	1	11	6	0	0	18.548	0	1.76	0	0
2004	1	11	7	0	0	17.082	0	1.605	0	0
2004	1	11	8	0	0	16.439	0	1.517	0	0
2004	1	11	9	0	0	15.294	0	1.47	0	0
2004	1	11	10	0	0	16.642	0	1.46	0	0
2004	1	11	11	0	0	17.113	0	1.473	0	0
2004	1	11	12	0	0	18.18	0	1.36	0	0
2004	1	11	13	0	0	17.132	0	1.38	0	0
2004	1	11	14	0	0	17.024	0	1.217	0	0
2004	1	11	15	0	0	16.726	0	1.27	0	0
2004	1	11	16	0	0	17.395	0	1.32	0	0
2004	1	11	17	0	0	15.586	0	1.51	0	0
2004	1	11	18	0	0	13.114	0	1.69	0	0
2004	1	11	19	0	0	16.54	0	1.835	0	0
2004	1	11	20	0	0	17.691	0	1.75	0	0
2004	1	11	21	0	0	16.566	0	2.08	0	0
2004	1	11	22	0	0	16.723	0	2.275	0	0
2004	1	11	23	0	0	16.209	0	2.503	0	0
2004	1	12	0	0	0	16.076	0	2.55	0	0
2004	1	12	1	0	0	16.93	0	2.565	0	0
2004	1	12	2	0	0	16.77	0	2.963	0	0
2004	1	12	3	0	0	17.168	0	3.12	0	0
2004	1	12	4	0	0	17.543	0	3.275	0	0
2004	1	12	5	0	0	17.791	0	3.203	0	0
2004	1	12	6	0	0	18.232	0	3.32	0	0
2004	1	12	7	0	0	17.625	0	3.26	0	0
2004	1	12	8	0	0	15.94	0	3.467	0	0
2004	1	12	9	0	0	13.986	0	3.24	0	0
2004	1	12	10	0	0	13.543	0	3.165	0	0
2004	1	12	11	0	0	12.69	0	3.013	0	0
2004	1	12	12	0	0	12.492	0	2.98	0	0
2004	1	12	13	0	0	13.513	0	2.815	0	0
2004	1	12	14	0	0	13.07	0	2.613	0	0
2004	1	12	15	0	0	12.264	0	2.45	0	0
2004	1	12	16	0	0	10.79	0	2.505	0	0
2004	1	12	17	0	0	10.227	0	2.087	0	0
2004	1	12	18	0	0	9.992	0	1.85	0	0
2004	1	12	19	0	0	9.393	0	1.91	0	0
2004	1	12	20	0	0	10.026	0	1.797	0	0
2004	1	12	21	0	0	10.956	0	1.75	0	0
2004	1	12	22	0	0	10.903	0	1.71	0	0
2004	1	12	23	0	0	12.736	0	1.697	0	0
2004	1	13	0	0	0	12.706	0	1.6	0	0
2004	1	13	1	0	0	13.702	0	1.59	0	0
2004	1	13	2	0	0	13.189	0	1.59	0	0
2004	1	13	3	0	0	13.038	0	1.5	0	0
2004	1	13	4	0	0	13.165	0	1.51	0	0
2004	1	13	5	0	0	14.327	0	1.607	0	0
2004	1	13	6	0	0	15.176	0	1.56	0	0
2004	1	13	7	0	0	16.53	0	1.585	0	0
2004	1	13	8	0	0	17.6	0	1.703	0	0
2004	1	13	9	0	0	18.526	0	1.86	0	0
2004	1	13	10	0	0	15.948	0	2.065	0	0
2004	1	13	11	0	0	15.037	0	2.363	0	0
2004	1	13	12	0	0	14.262	0	2.39	0	0
2004	1	13	13	0	0	12.143	0	2.38	0	0
2004	1	13	14	0	0	16.337	0	2.12	0	0
2004	1	13	15	0	0	18.848	0	2	0	0
2004	1	13	16	0	0	18.142	0	2.235	0	0
2004	1	13	17	0	0	17.901	0	2.773	0	0
2004	1	13	18	0	0	18.448	0	2.76	0	0
2004	1	13	19	0	0	18.057	0	2.98	0	0
2004	1	13	20	0	0	21.921	0	3.09	0	0
2004	1	13	21	0	0	23.718	0	3.16	0	0
2004	1	13	22	0	0	23.315	0	3.585	0	0
2004	1	13	23	0	0	21.406	0	3.943	0	0
2004	1	14	0	0	0	21.602	0	3.96	0	0
2004	1	14	1	0	0	21.153	0	4.29	0	0
2004	1	14	2	0	0	20.463	0	4.2	0	0
2004	1	14	3	0	0	20.566	0	3.77	0	0
2004	1	14	4	0	0	20.34	0	3.55	0	0
2004	1	14	5	0	0	19.267	0	3.297	0	0
2004	1	14	6	0	0	18.688	0	3.65	0	0
2004	1	14	7	0	0	16.788	0	3.445	0	0
2004	1	14	8	0	0	15.507	0	3.287	0	0
2004	1	14	9	0	0	13.816	0	3.25	0	0
2004	1	14	10	0	0	12.678	0	2.915	0	0
2004	1	14	11	0	0	12.614	0	2.957	0	0
2004	1	14	12	0	0	12.108	0	2.98	0	0
2004	1	14	13	0	0	11.28	0	2.89	0	0
2004	1	14	14	0	0	10.569	0	2.463	0	0
2004	1	14	15	0	0	9.094	0	2.48	0	0
2004	1	14	16	0	0	8.427	0	2.145	0	0
2004	1	14	17	0	0	5.526	0	2	0	0
2004	1	14	18	0	0	5.514	0	1.91	0	0
2004	1	14	19	0	0	5.193	0	1.79	0	0
2004	1	14	20	0	0	4.431	0	1.687	0	0
2004	1	14	21	0	0	4.662	0	1.64	0	0
2004	1	14	22	0	0	4.827	0	1.715	0	0
2004	1	14	23	0	0	8.587	0	1.647	0	0
2004	1	15	0	0	0	10.164	0	1.67	0	0
2004	1	15	1	0	0	8.993	0	1.545	0	0
2004	1	15	2	0	0	8.963	0	1.58	0	0
2004	1	15	3	0	0	11.634	0	1.47	0	0
2004	1	15	4	0	0	11.927	0	1.37	0	0
2004	1	15	5	0	0	11.253	0	1.52	0	0
2004	1	15	6	0	0	10.682	0	1.55	0	0
2004	1	15	7	0	0	10.595	0	1.585	0	0
2004	1	15	8	0	0	10.28	0	1.613	0	0
2004	1	15	9	0	0	8.986	0	1.7	0	0
2004	1	15	10	0	0	10.807	0	1.64	0	0
2004	1	15	11	0	0	12.111	0	1.663	0	0
2004	1	15	12	0	0	11.86	0	1.73	0	0
2004	1	15	13	0	0	12.953	0	1.89	0	0
2004	1	15	14	0	0	13.467	0	2.023	0	0
2004	1	15	15	0	0	13.282	0	2	0	0
2004	1	15	16	0	0	13.573	0	2.145	0	0
2004	1	15	17	0	0	13.023	0	2.117	0	0
2004	1	15	18	0	0	12.604	0	2.13	0	0
2004	1	15	19	0	0	11.267	0	2.115	0	0
2004	1	15	20	0	0	11.851	0	2.043	0	0
2004	1	15	21	0	0	12.628	0	1.92	0	0
2004	1	15	22	0	0	12.307	0	2.04	0	0
2004	1	15	23	0	0	12.456	0	1.957	0	0
2004	1	16	0	0	0	13.548	0	2	0	0
2004	1	16	1	0	0	14.963	0	1.985	0	0
2004	1	16	2	0	0	16.107	0	1.9	0	0
2004	1	16	3	0	0	17.36	0	1.8	0	0
2004	1	16	4	0	0	17.63	0	1.915	0	0
2004	1	16	5	0	0	18.037	0	2.137	0	0
2004	1	16	6	0	0	16.45	0	2.28	0	0
2004	1	16	7	0	0	15.92	0	2.44	0	0
2004	1	16	8	0	0	15.849	0	2.47	0	0
2004	1	16	9	0	0	13.974	0	2.34	0	0
2004	1	16	10	0	0	11.87	0	2.17	0	0
2004	1	16	11	0	0	11.916	0	1.91	0	0
2004	1	16	12	0	0	11.482	0	1.79	0	0
2004	1	16	13	0	0	8.53	0	1.76	0	0
2004	1	16	14	0	0	7.513	0	1.587	0	0
2004	1	16	15	0	0	7.786	0	1.43	0	0
2004	1	16	16	0	0	8.447	0	1.305	0	0
2004	1	16	17	0	0	7.901	0	1.163	0	0
2004	1	16	18	0	0	6.45	0	1.19	0	0
2004	1	16	19	0	0	6.035	0	1.11	0	0
2004	1	16	20	0	0	6.826	0	1.14	0	0
2004	1	16	21	0	0	6.914	0	1.23	0	0
2004	1	16	22	0	0	6.018	0	1.262	0	0
2004	1	16	23	0	0	7.3	0	1.293	0	0
2004	1	17	0	0	0	7.054	0	1.322	0	0
2004	1	17	1	0	0	6.042	0	1.35	0	0
2004	1	17	2	0	0	4.269	0	1.376	0	0
2004	1	17	3	0	0	3.074	0	1.401	0	0
2004	1	17	4	0	0	4.547	0	1.424	0	0
2004	1	17	5	0	0	5.343	0	1.447	0	0
2004	1	17	6	0	0	7.184	0	1.468	0	0
2004	1	17	7	0	0	7.425	0	1.488	0	0
2004	1	17	8	0	0	9.31	0	1.506	0	0
2004	1	17	9	0	0	15.322	0	1.524	0	0
2004	1	17	10	0	0	16.712	0	1.54	0	0
2004	1	17	11	0	0	16.943	0	1.556	0	0
2004	1	17	12	0	0	16.188	0	1.571	0	0
2004	1	17	13	0	0	16.925	0	1.585	0	0
2004	1	17	14	0	0	17.053	0	1.598	0	0
2004	1	17	15	0	0	17.754	0	1.61	0	0
2004	1	17	16	0	0	18.398	0	1.621	0	0
2004	1	17	17	0	0	18.903	0	1.632	0	0
2004	1	17	18	0	0	18.516	0	1.642	0	0
2004	1	17	19	0	0	18.192	0	1.651	0	0
2004	1	17	20	0	0	16.821	0	1.66	0	0
2004	1	17	21	0	0	15.792	0	1.669	0	0
2004	1	17	22	0	0	14.245	0	1.677	0	0
2004	1	17	23	0	0	13.49	0	1.684	0	0
2004	1	18	0	0	0	12.212	0	1.692	0	0
2004	1	18	1	0	0	11.295	0	1.699	0	0
2004	1	18	2	0	0	9.29	0	1.705	0	0
2004	1	18	3	0	0	8.536	0	1.712	0	0
2004	1	18	4	0	0	8.288	0	1.718	0	0
2004	1	18	5	0	0	7.444	0	1.724	0	0
2004	1	18	6	0	0	7.844	0	1.731	0	0
2004	1	18	7	0	0	6.88	0	1.737	0	0
2004	1	18	8	0	0	5.986	0	1.743	0	0
2004	1	18	9	0	0	5.044	0	1.749	0	0
2004	1	18	10	0	0	3.457	0	1.756	0	0
2004	1	18	11	0	0	2.004	0	1.762	0	0
2004	1	18	12	0	0	2.414	0	1.769	0	0
2004	1	18	13	0	0	3.823	0	1.776	0	0
2004	1	18	14	0	0	6.721	0	1.784	0	0
2004	1	18	15	0	0	9.096	0	1.792	0	0
2004	1	18	16	0	0	10.657	0	1.8	0	0
2004	1	18	17	0	0	12.781	0	1.809	0	0
2004	1	18	18	0	0	13.622	0	1.818	0	0
2004	1	18	19	0	0	14.94	0	1.828	0	0
2004	1	18	20	0	0	16.339	0	1.838	0	0
2004	1	18	21	0	0	17.902	0	1.849	0	0
2004	1	18	22	0	0	17.203	0	1.861	0	0
2004	1	18	23	0	0	18.073	0	1.874	0	0
2004	1	19	0	0	0	18.77	0	1.887	0	0
2004	1	19	1	0	0	17.892	0	1.902	0	0
2004	1	19	2	0	0	16.867	0	1.917	0	0
2004	1	19	3	0	0	16.498	0	1.933	0	0
2004	1	19	4	0	0	16.225	0	1.951	0	0
2004	1	19	5	0	0	14.801	0	1.969	0	0
2004	1	19	6	0	0	13.504	0	1.988	0	0
2004	1	19	7	0	0	13.82	0	2.009	0	0
2004	1	19	8	0	0	14.817	0	2.031	0	0
2004	1	19	9	0	0	13.438	0	2.054	0	0
2004	1	19	10	0	0	9.833	0	2.078	0	0
2004	1	19	11	0	0	7.491	0	2.104	0	0
2004	1	19	12	0	0	5.838	0	2.131	0	0
2004	1	19	13	0	0	5.247	0	2.16	0	0
2004	1	19	14	0	0	5.59	0	2.19	0	0
2004	1	19	15	0	0	5.53	0	2.26	0	0
2004	1	19	16	0	0	6.473	0	2.295	0	0
2004	1	19	17	0	0	6.603	0	2.27	0	0
2004	1	19	18	0	0	6.674	0	2.29	0	0
2004	1	19	19	0	0	7.283	0	2.245	0	0
2004	1	19	20	0	0	7.704	0	2.133	0	0
2004	1	19	21	0	0	7.248	0	2.02	0	0
2004	1	19	22	0	0	7.745	0	1.965	0	0
2004	1	19	23	0	0	7.961	0	1.83	0	0
2004	1	20	0	0	0	8.098	0	1.72	0	0
2004	1	20	1	0	0	8.263	0	1.785	0	0
2004	1	20	2	0	0	9.566	0	1.6	0	0
2004	1	20	3	0	0	9.548	0	1.55	0	0
2004	1	20	4	0	0	9.432	0	1.575	0	0
2004	1	20	5	0	0	9.804	0	1.553	0	0
2004	1	20	6	0	0	9.12	0	1.62	0	0
2004	1	20	7	0	0	9.283	0	1.575	0	0
2004	1	20	8	0	0	8.049	0	1.567	0	0
2004	1	20	9	0	0	8.998	0	1.68	0	0
2004	1	20	10	0	0	7.467	0	1.61	0	0
2004	1	20	11	0	0	7.47	0	1.62	0	0
2004	1	20	12	0	0	7.664	0	1.59	0	0
2004	1	20	13	0	0	6.995	0	1.445	0	0
2004	1	20	14	0	0	6.661	0	1.413	0	0
2004	1	20	15	0	0	8.404	0	1.38	0	0
2004	1	20	16	0	0	7.552	0	1.35	0	0
2004	1	20	17	0	0	6.183	0	1.477	0	0
2004	1	20	18	0	0	6.088	0	1.57	0	0
2004	1	20	19	0	0	5.392	0	1.49	0	0
2004	1	20	20	0	0	5.849	0	1.437	0	0
2004	1	20	21	0	0	5.158	0	1.29	0	0
2004	1	20	22	0	0	4.382	0	1.315	0	0
2004	1	20	23	0	0	3.586	0	1.273	0	0
2004	1	21	0	0	0	5.45	0	1.25	0	0
2004	1	21	1	0	0	3.932	0	1.18	0	0
2004	1	21	2	0	0	4.367	0	0.997	0	0
2004	1	21	3	0	0	4.876	0	1.03	0	0
2004	1	21	4	0	0	5.543	0	0.945	0	0
2004	1	21	5	0	0	4.917	0	0.87	0	0
2004	1	21	6	0	0	5.238	0	0.85	0	0
2004	1	21	7	0	0	4.573	0	0.83	0	0
2004	1	21	8	0	0	4.046	0	0.837	0	0
2004	1	21	9	0	0	4.246	0	0.83	0	0
2004	1	21	10	0	0	3.812	0	0.78	0	0
2004	1	21	11	0	0	3.077	0	0.74	0	0
2004	1	21	12	0	0	3.454	0	0.77	0	0
2004	1	21	13	0	0	2.793	0	0.73	0	0
2004	1	21	14	0	0	2.301	0	0.643	0	0
2004	1	21	15	0	0	2.444	0	0.62	0	0
2004	1	21	16	0	0	2.817	0	0.605	0	0
2004	1	21	17	0	0	2.483	0	0.57	0	0
2004	1	21	18	0	0	3.784	0	0.53	0	0
2004	1	21	19	0	0	4.543	0	0.515	0	0
2004	1	21	20	0	0	5.504	0	0.45	0	0
2004	1	21	21	0	0	6.348	0	0.44	0	0
2004	1	21	22	0	0	6.763	0	0.5	0	0
2004	1	21	23	0	0	7.23	0	0.53	0	0
2004	1	22	0	0	0	7.52	0	0.56	0	0
2004	1	22	1	0	0	8.31	0	0.61	0	0
2004	1	22	2	0	0	8.999	0	0.723	0	0
2004	1	22	3	0	0	9.87	0	0.84	0	0
2004	1	22	4	0	0	9.592	0	0.845	0	0
2004	1	22	5	0	0	9.576	0	0.91	0	0
2004	1	22	6	0	0	9.598	0	1.05	0	0
2004	1	22	7	0	0	9.745	0	1.105	0	0
2004	1	22	8	0	0	10.11	0	1.157	0	0
2004	1	22	9	0	0	11.588	0	1.26	0	0
2004	1	22	10	0	0	12.305	0	1.33	0	0
2004	1	22	11	0	0	11.949	0	1.52	0	0
2004	1	22	12	0	0	11.65	0	1.75	0	0
2004	1	22	13	0	0	11.788	0	1.75	0	0
2004	1	22	14	0	0	11.927	0	1.603	0	0
2004	1	22	15	0	0	12.702	0	1.51	0	0
2004	1	22	16	0	0	12.35	0	1.57	0	0
2004	1	22	17	0	0	12.207	0	1.653	0	0
2004	1	22	18	0	0	12.002	0	1.63	0	0
2004	1	22	19	0	0	12.028	0	1.58	0	0
2004	1	22	20	0	0	11.799	0	1.717	0	0
2004	1	22	21	0	0	11.28	0	1.6	0	0
2004	1	22	22	0	0	11.413	0	1.555	0	0
2004	1	22	23	0	0	11.217	0	1.393	0	0
2004	1	23	0	0	0	10.554	0	1.41	0	0
2004	1	23	1	0	0	10.18	0	1.345	0	0
2004	1	23	2	0	0	9.733	0	1.317	0	0
2004	1	23	3	0	0	9.914	0	1.26	0	0
2004	1	23	4	0	0	9.222	0	1.305	0	0
2004	1	23	5	0	0	9.127	0	1.237	0	0
2004	1	23	6	0	0	8.902	0	1.17	0	0
2004	1	23	7	0	0	9.662	0	1.205	0	0
2004	1	23	8	0	0	9.037	0	1.2	0	0
2004	1	23	9	0	0	8.528	0	1.27	0	0
2004	1	23	10	0	0	8.225	0	1.2	0	0
2004	1	23	11	0	0	8.009	0	1.183	0	0
2004	1	23	12	0	0	8.882	0	1.14	0	0
2004	1	23	13	0	0	9.278	0	1.115	0	0
2004	1	23	14	0	0	8.169	0	1.063	0	0
2004	1	23	15	0	0	8.524	0	1.05	0	0
2004	1	23	16	0	0	8.608	0	0.99	0	0
2004	1	23	17	0	0	9.281	0	0.917	0	0
2004	1	23	18	0	0	9.342	0	0.95	0	0
2004	1	23	19	0	0	9.095	0	0.935	0	0
2004	1	23	20	0	0	9.3	0	0.967	0	0
2004	1	23	21	0	0	9.936	0	1.01	0	0
2004	1	23	22	0	0	10.062	0	1.055	0	0
2004	1	23	23	0	0	10.051	0	1.087	0	0
2004	1	24	0	0	0	10.39	0	1.11	0	0
2004	1	24	1	0	0	10.707	0	1.115	0	0
2004	1	24	2	0	0	11.67	0	1.163	0	0
2004	1	24	3	0	0	11.576	0	1.23	0	0
2004	1	24	4	0	0	11.368	0	1.245	0	0
2004	1	24	5	0	0	12.371	0	1.277	0	0
2004	1	24	6	0	0	12.828	0	1.23	0	0
2004	1	24	7	0	0	12.378	0	1.215	0	0
2004	1	24	8	0	0	12.527	0	1.313	0	0
2004	1	24	9	0	0	12.33	0	1.48	0	0
2004	1	24	10	0	0	11.748	0	1.475	0	0
2004	1	24	11	0	0	11.537	0	1.593	0	0
2004	1	24	12	0	0	10.542	0	1.48	0	0
2004	1	24	13	0	0	9.578	0	1.57	0	0
2004	1	24	14	0	0	7.241	0	1.433	0	0
2004	1	24	15	0	0	9.1	0	1.28	0	0
2004	1	24	16	0	0	9.283	0	1.165	0	0
2004	1	24	17	0	0	9.446	0	0.953	0	0
2004	1	24	18	0	0	9.446	0	0.85	0	0
2004	1	24	19	0	0	9.645	0	0.815	0	0
2004	1	24	20	0	0	9.699	0	0.817	0	0
2004	1	24	21	0	0	9.186	0	0.85	0	0
2004	1	24	22	0	0	9.483	0	0.925	0	0
2004	1	24	23	0	0	8.78	0	0.983	0	0
2004	1	25	0	0	0	8.948	0	1.05	0	0
2004	1	25	1	0	0	8.777	0	1.09	0	0
2004	1	25	2	0	0	8.819	0	1.17	0	0
2004	1	25	3	0	0	8.444	0	1.19	0	0
2004	1	25	4	0	0	7.542	0	1.235	0	0
2004	1	25	5	0	0	6.977	0	1.163	0	0
2004	1	25	6	0	0	7.446	0	1.1	0	0
2004	1	25	7	0	0	7.578	0	1.185	0	0
2004	1	25	8	0	0	5.51	0	1.153	0	0
2004	1	25	9	0	0	4.944	0	1.09	0	0
2004	1	25	10	0	0	5.382	0	1.23	0	0
2004	1	25	11	0	0	5.114	0	1.263	0	0
2004	1	25	12	0	0	5.434	0	1.25	0	0
2004	1	25	13	0	0	5.502	0	1.17	0	0
2004	1	25	14	0	0	4.641	0	1.117	0	0
2004	1	25	15	0	0	5.322	0	1.08	0	0
2004	1	25	16	0	0	4.343	0	1.1	0	0
2004	1	25	17	0	0	3.926	0	1.067	0	0
2004	1	25	18	0	0	3.782	0	1.09	0	0
2004	1	25	19	0	0	4.088	0	1.045	0	0
2004	1	25	20	0	0	3.509	0	0.993	0	0
2004	1	25	21	0	0	4.01	0	1.02	0	0
2004	1	25	22	0	0	3.732	0	1.105	0	0
2004	1	25	23	0	0	3.924	0	1.147	0	0
2004	1	26	0	0	0	2.672	0	1.14	0	0
2004	1	26	1	0	0	2.508	0	1.03	0	0
2004	1	26	2	0	0	1.733	0	0.99	0	0
2004	1	26	3	0	0	1.06	0	0.96	0	0
2004	1	26	4	0	0	2.027	0	0.975	0	0
2004	1	26	5	0	0	1.321	0	1.007	0	0
2004	1	26	6	0	0	2.094	0	1.04	0	0
2004	1	26	7	0	0	2.768	0	0.92	0	0
2004	1	26	8	0	0	2.681	0	0.887	0	0
2004	1	26	9	0	0	3.396	0	0.9	0	0
2004	1	26	10	0	0	3.275	0	0.935	0	0
2004	1	26	11	0	0	4.454	0	0.953	0	0
2004	1	26	12	0	0	2.856	0	0.96	0	0
2004	1	26	13	0	0	2.347	0	0.985	0	0
2004	1	26	14	0	0	2.629	0	1.033	0	0
2004	1	26	15	0	0	3.478	0	0.94	0	0
2004	1	26	16	0	0	5.577	0	0.97	0	0
2004	1	26	17	0	0	6.414	0	0.97	0	0
2004	1	26	18	0	0	5.788	0	1.11	0	0
2004	1	26	19	0	0	6.202	0	1.065	0	0
2004	1	26	20	0	0	5.543	0	1.06	0	0
2004	1	26	21	0	0	4.632	0	1.04	0	0
2004	1	26	22	0	0	3.635	0	1.12	0	0
2004	1	26	23	0	0	3.421	0	1.107	0	0
2004	1	27	0	0	0	3.284	0	1.08	0	0
2004	1	27	1	0	0	3.342	0	1.165	0	0
2004	1	27	2	0	0	2.81	0	1.137	0	0
2004	1	27	3	0	0	1.458	0	1.03	0	0
2004	1	27	4	0	0	1.38	0	1.24	0	0
2004	1	27	5	0	0	1.366	0	1.107	0	0
2004	1	27	6	0	0	1.216	0	1.24	0	0
2004	1	27	7	0	0	1.258	0	1.075	0	0
2004	1	27	8	0	0	2.136	0	0.983	0	0
2004	1	27	9	0	0	2.854	0	1.02	0	0
2004	1	27	10	0	0	4.473	0	0.975	0	0
2004	1	27	11	0	0	5.79	0	0.987	0	0
2004	1	27	12	0	0	6.076	0	1.03	0	0
2004	1	27	13	0	0	7.038	0	2.185	0	0
2004	1	27	14	0	0	7.531	0	2.31	0	0
2004	1	27	15	0	0	7.6	0	2.156	0	0
2004	1	27	16	0	0	5.778	0	2.491	0	0
2004	1	27	17	0	0	6.473	0	2.736	0	0
2004	1	27	18	0	0	3.23	0	2.674	0	0
2004	1	27	19	0	0	4.278	0	2.197	0	0
2004	1	27	20	0	0	3.887	0	1.71	0	0
2004	1	27	21	0	0	2.652	0	1.072	0	0
2004	1	27	22	0	0	5.548	0	1.279	0	0
2004	1	27	23	0	0	2.629	0	1.657	0	0
2004	1	28	0	0	0	3.782	0	1.916	0	0
2004	1	28	1	0	0	3.592	0	1.867	0	0
2004	1	28	2	0	0	4.877	0	2.014	0	0
2004	1	28	3	0	0	5.782	0	2.156	0	0
2004	1	28	4	0	0	7.228	0	2.227	0	0
2004	1	28	5	0	0	8.251	0	2.174	0	0
2004	1	28	6	0	0	8.252	0	1.7	0	0
2004	1	28	7	0	0	6.64	0	1.651	0	0
2004	1	28	8	0	0	7.469	0	1.001	0	0
2004	1	28	9	0	0	6.986	0	1.169	0	0
2004	1	28	10	0	0	7.7	0	1.355	0	0
2004	1	28	11	0	0	8.643	0	1.473	0	0
2004	1	28	12	0	0	7.736	0	1.55	0	0
2004	1	28	13	0	0	9.155	0	1.788	0	0
2004	1	28	14	0	0	11.686	0	1.797	0	0
2004	1	28	15	0	0	10.18	0	1.627	0	0
2004	1	28	16	0	0	11.665	0	1.276	0	0
2004	1	28	17	0	0	6.48	0	2.109	0	0
2004	1	28	18	0	0	4.644	0	2.558	0	0
2004	1	28	19	0	0	8.802	0	2.225	0	0
2004	1	28	20	0	0	7.306	0	2.417	0	0
2004	1	28	21	0	0	10.778	0	2.879	0	0
2004	1	28	22	0	0	9.607	0	2.89	0	0
2004	1	28	23	0	0	12.419	0	3.067	0	0
2004	1	29	0	0	0	10.732	0	3.056	0	0
2004	1	29	1	0	0	12.233	0	3.052	0	0
2004	1	29	2	0	0	8.561	0	2.944	0	0
2004	1	29	3	0	0	12.43	0	3.007	0	0
2004	1	29	4	0	0	12.56	0	2.804	0	0
2004	1	29	5	0	0	12.904	0	2.271	0	0
2004	1	29	6	0	0	11.456	0	1.979	0	0
2004	1	29	7	0	0	19.063	0	2.738	0	0
2004	1	29	8	0	0	18.029	0	3.362	0	0
2004	1	29	9	0	0	13.674	0	3.557	0	0
2004	1	29	10	0	0	11.573	0	3.729	0	0
2004	1	29	11	0	0	9.009	0	3.683	0	0
2004	1	29	12	0	0	6.198	0	3.268	0	0
2004	1	29	13	0	0	8.427	0	3.515	0	0
2004	1	29	14	0	0	8.857	0	3.868	0	0
2004	1	29	15	0	0	11.848	0	4.109	0	0
2004	1	29	16	0	0	13.562	0	4.16	0	0
2004	1	29	17	0	0	16.097	0	3.851	0	0
2004	1	29	18	0	0	16.728	0	3.953	0	0
2004	1	29	19	0	0	16.9	0	3.56	0	0
2004	1	29	20	0	0	15.033	0	3.662	0	0
2004	1	29	21	0	0	13.316	0	3.607	0	0
2004	1	29	22	0	0	13.568	0	3.509	0	0
2004	1	29	23	0	0	12.059	0	3.455	0	0
2004	1	30	0	0	0	11.132	0	3.334	0	0
2004	1	30	1	0	0	10.503	0	2.915	0	0
2004	1	30	2	0	0	10.101	0	3.161	0	0
2004	1	30	3	0	0	8.82	0	3.105	0	0
2004	1	30	4	0	0	7.912	0	2.766	0	0
2004	1	30	5	0	0	8.49	0	2.408	0	0
2004	1	30	6	0	0	9.708	0	1.861	0	0
2004	1	30	7	0	0	14.707	0	2.736	0	0
2004	1	30	8	0	0	15.284	0	2.659	0	0
2004	1	30	9	0	0	16.508	0	2.444	0	0
2004	1	30	10	0	0	16.378	0	2.61	0	0
2004	1	30	11	0	0	16.657	0	2.846	0	0
2004	1	30	12	0	0	16.84	0	2.907	0	0
2004	1	30	13	0	0	17.288	0	2.916	0	0
2004	1	30	14	0	0	17.054	0	2.907	0	0
2004	1	30	15	0	0	16.428	0	2.879	0	0
2004	1	30	16	0	0	16.897	0	2.876	0	0
2004	1	30	17	0	0	17.276	0	2.854	0	0
2004	1	30	18	0	0	17.056	0	2.836	0	0
2004	1	30	19	0	0	19.15	0	2.446	0	0
2004	1	30	20	0	0	20.559	0	2.63	0	0
2004	1	30	21	0	0	20.1	0	2.715	0	0
2004	1	30	22	0	0	18.688	0	2.857	0	0
2004	1	30	23	0	0	18.474	0	2.968	0	0
2004	1	31	0	0	0	19.474	0	2.773	0	0
2004	1	31	1	0	0	19.215	0	2.459	0	0
2004	1	31	2	0	0	19.2	0	2.82	0	0
2004	1	31	3	0	0	20.422	0	2.823	0	0
2004	1	31	4	0	0	20.317	0	2.814	0	0
2004	1	31	5	0	0	21.083	0	2.918	0	0
2004	1	31	6	0	0	20.17	0	3.091	0	0
2004	1	31	7	0	0	20.712	0	2.99	0	0
2004	1	31	8	0	0	20.273	0	2.916	0	0
2004	1	31	9	0	0	19.764	0	2.79	0	0
2004	1	31	10	0	0	18.753	0	2.265	0	0
2004	1	31	11	0	0	17.673	0	2.027	0	0
2004	1	31	12	0	0	18.202	0	1.603	0	0
2004	1	31	13	0	0	19.568	0	1.655	0	0
2004	1	31	14	0	0	19.627	0	1.642	0	0
2004	1	31	15	0	0	19.312	0	1.362	0	0
2004	1	31	16	0	0	19.218	0	1.511	0	0
2004	1	31	17	0	0	21.284	0	1.271	0	0
2004	1	31	18	0	0	22.41	0	1.695	0	0
2004	1	31	19	0	0	22.518	0	2.924	0	0
2004	1	31	20	0	0	22.959	0	2.844	0	0
2004	1	31	21	0	0	22.874	0	3.207	0	0
2004	1	31	22	0	0	24.04	0	3.119	0	0
2004	1	31	23	0	0	24.871	0	3.365	0	0
2004	2	1	0	0	0	23.806	0	3.602	0	0
2004	2	1	1	0	0	24.417	0	3.723	0	0
2004	2	1	2	0	0	20.746	0	3.86	0	0
2004	2	1	3	0	0	18.2	0	3.547	0	0
2004	2	1	4	0	0	15.793	0	3.485	0	0
2004	2	1	5	0	0	12.45	0	2.652	0	0
2004	2	1	6	0	0	9.844	0	2.502	0	0
2004	2	1	7	0	0	6.795	0	2.644	0	0
2004	2	1	8	0	0	4.629	0	2.569	0	0
2004	2	1	9	0	0	2.9	0	2.48	0	0
2004	2	1	10	0	0	3.49	0	1.171	0	0
2004	2	1	11	0	0	2.879	0	1.227	0	0
2004	2	1	12	0	0	2.826	0	1.085	0	0
2004	2	1	13	0	0	1.698	0	1.84	0	0
2004	2	1	14	0	0	3.081	0	1.73	0	0
2004	2	1	15	0	0	9.418	0	1.56	0	0
2004	2	1	16	0	0	12.015	0	1.535	0	0
2004	2	1	17	0	0	13.52	0	1.553	0	0
2004	2	1	18	0	0	13.108	0	1.51	0	0
2004	2	1	19	0	0	13.11	0	1.635	0	0
2004	2	1	20	0	0	15.857	0	1.657	0	0
2004	2	1	21	0	0	14.52	0	1.61	0	0
2004	2	1	22	0	0	13.757	0	1.57	0	0
2004	2	1	23	0	0	13.887	0	1.503	0	0
2004	2	2	0	0	0	12.318	0	1.42	0	0
2004	2	2	1	0	0	14.087	0	1.355	0	0
2004	2	2	2	0	0	17.739	0	1.32	0	0
2004	2	2	3	0	0	19.836	0	1.33	0	0
2004	2	2	4	0	0	20.085	0	1.61	0	0
2004	2	2	5	0	0	19.119	0	2.1	0	0
2004	2	2	6	0	0	17.628	0	2.41	0	0
2004	2	2	7	0	0	17.728	0	2.385	0	0
2004	2	2	8	0	0	18.054	0	2.163	0	0
2004	2	2	9	0	0	15.534	0	2.106	0	0
2004	2	2	10	0	0	14.855	0	2.09	0	0
2004	2	2	11	0	0	15.131	0	1.999	0	0
2004	2	2	12	0	0	14.604	0	1.958	0	0
2004	2	2	13	0	0	14.713	0	1.888	0	0
2004	2	2	14	0	0	13.607	0	1.77	0	0
2004	2	2	15	0	0	13.892	0	1.585	0	0
2004	2	2	16	0	0	12.95	0	1.627	0	0
2004	2	2	17	0	0	11.909	0	1.562	0	0
2004	2	2	18	0	0	11.704	0	1.489	0	0
2004	2	2	19	0	0	12.667	0	1.349	0	0
2004	2	2	20	0	0	14.004	0	1.73	0	0
2004	2	2	21	0	0	15.47	0	1.869	0	0
2004	2	2	22	0	0	16.267	0	1.624	0	0
2004	2	2	23	0	0	16.291	0	1.454	0	0
2004	2	3	0	0	0	16.322	0	1.583	0	0
2004	2	3	1	0	0	17.462	0	1.686	0	0
2004	2	3	2	0	0	18.333	0	1.701	0	0
2004	2	3	3	0	0	20.096	0	1.78	0	0
2004	2	3	4	0	0	19.027	0	1.896	0	0
2004	2	3	5	0	0	19.067	0	1.715	0	0
2004	2	3	6	0	0	18.822	0	1.147	0	0
2004	2	3	7	0	0	18.938	0	1.357	0	0
2004	2	3	8	0	0	19.347	0	1.603	0	0
2004	2	3	9	0	0	19.992	0	1.69	0	0
2004	2	3	10	0	0	19.86	0	1.69	0	0
2004	2	3	11	0	0	19.983	0	1.835	0	0
2004	2	3	12	0	0	19.966	0	1.84	0	0
2004	2	3	13	0	0	19.977	0	2.092	0	0
2004	2	3	14	0	0	22.224	0	2.341	0	0
2004	2	3	15	0	0	22.774	0	2.408	0	0
2004	2	3	16	0	0	22.855	0	2.485	0	0
2004	2	3	17	0	0	22.496	0	2.557	0	0
2004	2	3	18	0	0	21.838	0	2.686	0	0
2004	2	3	19	0	0	21.727	0	2.801	0	0
2004	2	3	20	0	0	20.304	0	2.7	0	0
2004	2	3	21	0	0	20.082	0	2.708	0	0
2004	2	3	22	0	0	20.898	0	2.693	0	0
2004	2	3	23	0	0	21.471	0	2.493	0	0
2004	2	4	0	0	0	20.904	0	2.365	0	0
2004	2	4	1	0	0	20.017	0	2.706	0	0
2004	2	4	2	0	0	18.95	0	2.646	0	0
2004	2	4	3	0	0	19.06	0	2.505	0	0
2004	2	4	4	0	0	18.95	0	2.48	0	0
2004	2	4	5	0	0	18.621	0	2.357	0	0
2004	2	4	6	0	0	17.882	0	2.203	0	0
2004	2	4	7	0	0	18.017	0	2.07	0	0
2004	2	4	8	0	0	17.031	0	1.886	0	0
2004	2	4	9	0	0	16.952	0	1.892	0	0
2004	2	4	10	0	0	16.385	0	1.877	0	0
2004	2	4	11	0	0	16.103	0	1.732	0	0
2004	2	4	12	0	0	14.876	0	1.138	0	0
2004	2	4	13	0	0	16.313	0	1.036	0	0
2004	2	4	14	0	0	17.926	0	0.999	0	0
2004	2	4	15	0	0	18.616	0	0.951	0	0
2004	2	4	16	0	0	18.045	0	1.615	0	0
2004	2	4	17	0	0	20.22	0	1.928	0	0
2004	2	4	18	0	0	21.316	0	1.855	0	0
2004	2	4	19	0	0	20.922	0	2.058	0	0
2004	2	4	20	0	0	22.264	0	1.919	0	0
2004	2	4	21	0	0	24.704	0	2.468	0	0
2004	2	4	22	0	0	22.827	0	2.655	0	0
2004	2	4	23	0	0	22.22	0	2.636	0	0
2004	2	5	0	0	0	21.354	0	2.722	0	0
2004	2	5	1	0	0	20.273	0	2.716	0	0
2004	2	5	2	0	0	20.653	0	2.581	0	0
2004	2	5	3	0	0	19.88	0	2.628	0	0
2004	2	5	4	0	0	19.08	0	2.62	0	0
2004	2	5	5	0	0	19.206	0	2.601	0	0
2004	2	5	6	0	0	18.53	0	2.414	0	0
2004	2	5	7	0	0	17.037	0	2.311	0	0
2004	2	5	8	0	0	16.946	0	2.238	0	0
2004	2	5	9	0	0	17.884	0	2.253	0	0
2004	2	5	10	0	0	17.422	0	2.143	0	0
2004	2	5	11	0	0	17.197	0	1.988	0	0
2004	2	5	12	0	0	17.11	0	2	0	0
2004	2	5	13	0	0	17.413	0	1.908	0	0
2004	2	5	14	0	0	15.933	0	1.898	0	0
2004	2	5	15	0	0	16.816	0	1.885	0	0
2004	2	5	16	0	0	17.525	0	1.811	0	0
2004	2	5	17	0	0	17.466	0	1.799	0	0
2004	2	5	18	0	0	16.856	0	1.805	0	0
2004	2	5	19	0	0	15.115	0	1.814	0	0
2004	2	5	20	0	0	14.4	0	1.798	0	0
2004	2	5	21	0	0	14.032	0	1.855	0	0
2004	2	5	22	0	0	13.713	0	1.817	0	0
2004	2	5	23	0	0	13.911	0	1.721	0	0
2004	2	6	0	0	0	13.544	0	1.684	0	0
2004	2	6	1	0	0	15.265	0	1.609	0	0
2004	2	6	2	0	0	14.88	0	1.565	0	0
2004	2	6	3	0	0	14.954	0	1.479	0	0
2004	2	6	4	0	0	15.982	0	1.469	0	0
2004	2	6	5	0	0	15.306	0	1.368	0	0
2004	2	6	6	0	0	15.91	0	1.181	0	0
2004	2	6	7	0	0	17.925	0	1.394	0	0
2004	2	6	8	0	0	17.11	0	1.57	0	0
2004	2	6	9	0	0	16.28	0	1.704	0	0
2004	2	6	10	0	0	15.938	0	1.747	0	0
2004	2	6	11	0	0	14.824	0	1.686	0	0
2004	2	6	12	0	0	11.4	0	1.126	0	0
2004	2	6	13	0	0	9.607	0	1.075	0	0
2004	2	6	14	0	0	7.591	0	1.046	0	0
2004	2	6	15	0	0	7.22	0	1.272	0	0
2004	2	6	16	0	0	5.908	0	1.486	0	0
2004	2	6	17	0	0	4.991	0	1.544	0	0
2004	2	6	18	0	0	6.154	0	1.626	0	0
2004	2	6	19	0	0	6.757	0	1.524	0	0
2004	2	6	20	0	0	7.216	0	1.438	0	0
2004	2	6	21	0	0	8.094	0	1.379	0	0
2004	2	6	22	0	0	9.778	0	1.345	0	0
2004	2	6	23	0	0	10.629	0	1.281	0	0
2004	2	7	0	0	0	9.08	0	0.899	0	0
2004	2	7	1	0	0	7.418	0	0.963	0	0
2004	2	7	2	0	0	7.349	0	1.159	0	0
2004	2	7	3	0	0	11.51	0	1.172	0	0
2004	2	7	4	0	0	12.805	0	0.888	0	0
2004	2	7	5	0	0	11.831	0	0.941	0	0
2004	2	7	6	0	0	13.532	0	1.179	0	0
2004	2	7	7	0	0	11.823	0	1.381	0	0
2004	2	7	8	0	0	13.891	0	1.586	0	0
2004	2	7	9	0	0	15.666	0	1.614	0	0
2004	2	7	10	0	0	14.455	0	1.776	0	0
2004	2	7	11	0	0	13.381	0	2.1	0	0
2004	2	7	12	0	0	15.138	0	2.221	0	0
2004	2	7	13	0	0	17.268	0	2.299	0	0
2004	2	7	14	0	0	16.537	0	2.416	0	0
2004	2	7	15	0	0	18.044	0	2.859	0	0
2004	2	7	16	0	0	17.23	0	2.994	0	0
2004	2	7	17	0	0	15.806	0	3.152	0	0
2004	2	7	18	0	0	14.654	0	3.208	0	0
2004	2	7	19	0	0	15.577	0	2.84	0	0
2004	2	7	20	0	0	14.961	0	3.288	0	0
2004	2	7	21	0	0	16.092	0	3.238	0	0
2004	2	7	22	0	0	14.003	0	2.815	0	0
2004	2	7	23	0	0	17.699	0	3.148	0	0
2004	2	8	0	0	0	19.958	0	3.093	0	0
2004	2	8	1	0	0	18.315	0	2.119	0	0
2004	2	8	2	0	0	12.581	0	3.195	0	0
2004	2	8	3	0	0	13.568	0	3.274	0	0
2004	2	8	4	0	0	12.933	0	3.036	0	0
2004	2	8	5	0	0	10.886	0	3.092	0	0
2004	2	8	6	0	0	9.92	0	2.863	0	0
2004	2	8	7	0	0	6.598	0	2.325	0	0
2004	2	8	8	0	0	3.893	0	2.169	0	0
2004	2	8	9	0	0	8.396	0	3.107	0	0
2004	2	8	10	0	0	13.312	0	3.199	0	0
2004	2	8	11	0	0	15.094	0	2.984	0	0
2004	2	8	12	0	0	15.136	0	2.931	0	0
2004	2	8	13	0	0	16.968	0	2.476	0	0
2004	2	8	14	0	0	18.141	0	2.347	0	0
2004	2	8	15	0	0	17.92	0	2.801	0	0
2004	2	8	16	0	0	17.153	0	3.203	0	0
2004	2	8	17	0	0	16.403	0	3.264	0	0
2004	2	8	18	0	0	15.398	0	3.304	0	0
2004	2	8	19	0	0	15.888	0	3.086	0	0
2004	2	8	20	0	0	16.866	0	3.056	0	0
2004	2	8	21	0	0	21.866	0	3.393	0	0
2004	2	8	22	0	0	21.827	0	3.971	0	0
2004	2	8	23	0	0	21.889	0	4.675	0	0
2004	2	9	0	0	0	19.784	0	4.752	0	0
2004	2	9	1	0	0	18.623	0	4.351	0	0
2004	2	9	2	0	0	20.366	0	4.938	0	0
2004	2	9	3	0	0	20.41	0	4.968	0	0
2004	2	9	4	0	0	20.623	0	4.874	0	0
2004	2	9	5	0	0	18.789	0	4.82	0	0
2004	2	9	6	0	0	17.362	0	4.862	0	0
2004	2	9	7	0	0	14.792	0	4.586	0	0
2004	2	9	8	0	0	16.076	0	4.478	0	0
2004	2	9	9	0	0	17.21	0	4.32	0	0
2004	2	9	10	0	0	14.412	0	3.958	0	0
2004	2	9	11	0	0	13.76	0	3.964	0	0
2004	2	9	12	0	0	13.522	0	3.534	0	0
2004	2	9	13	0	0	13.865	0	3.772	0	0
2004	2	9	14	0	0	14.373	0	3.728	0	0
2004	2	9	15	0	0	14.206	0	3.639	0	0
2004	2	9	16	0	0	12.973	0	3.646	0	0
2004	2	9	17	0	0	11.776	0	3.513	0	0
2004	2	9	18	0	0	12.202	0	3.492	0	0
2004	2	9	19	0	0	11.127	0	3.302	0	0
2004	2	9	20	0	0	10.689	0	3.262	0	0
2004	2	9	21	0	0	9.348	0	3.055	0	0
2004	2	9	22	0	0	7.71	0	3.079	0	0
2004	2	9	23	0	0	10.819	0	3.059	0	0
2004	2	10	0	0	0	11.782	0	2.945	0	0
2004	2	10	1	0	0	11.378	0	2.774	0	0
2004	2	10	2	0	0	10.671	0	2.635	0	0
2004	2	10	3	0	0	9.266	0	2.536	0	0
2004	2	10	4	0	0	9.925	0	2.427	0	0
2004	2	10	5	0	0	11.319	0	2.306	0	0
2004	2	10	6	0	0	11.088	0	2.167	0	0
2004	2	10	7	0	0	10.823	0	2.082	0	0
2004	2	10	8	0	0	11.077	0	2.007	0	0
2004	2	10	9	0	0	12.002	0	1.962	0	0
2004	2	10	10	0	0	15.087	0	1.66	0	0
2004	2	10	11	0	0	15.589	0	1.502	0	0
2004	2	10	12	0	0	16.016	0	1.588	0	0
2004	2	10	13	0	0	17.477	0	1.897	0	0
2004	2	10	14	0	0	18.137	0	2.067	0	0
2004	2	10	15	0	0	18.792	0	2.04	0	0
2004	2	10	16	0	0	18.048	0	1.64	0	0
2004	2	10	17	0	0	18.253	0	1.961	0	0
2004	2	10	18	0	0	18.226	0	1.916	0	0
2004	2	10	19	0	0	16.638	0	2.34	0	0
2004	2	10	20	0	0	16.503	0	2.36	0	0
2004	2	10	21	0	0	15.76	0	2.465	0	0
2004	2	10	22	0	0	15.188	0	3.042	0	0
2004	2	10	23	0	0	14.523	0	3.003	0	0
2004	2	11	0	0	0	14.22	0	2.922	0	0
2004	2	11	1	0	0	13.895	0	2.906	0	0
2004	2	11	2	0	0	13.063	0	2.829	0	0
2004	2	11	3	0	0	12.338	0	2.678	0	0
2004	2	11	4	0	0	12.15	0	2.499	0	0
2004	2	11	5	0	0	9.893	0	2.36	0	0
2004	2	11	6	0	0	9.606	0	2.385	0	0
2004	2	11	7	0	0	8.767	0	2.282	0	0
2004	2	11	8	0	0	7.831	0	2.114	0	0
2004	2	11	9	0	0	7.038	0	2.109	0	0
2004	2	11	10	0	0	6.87	0	1.83	0	0
2004	2	11	11	0	0	6.236	0	1.722	0	0
2004	2	11	12	0	0	5.486	0	1.652	0	0
2004	2	11	13	0	0	5.348	0	1.595	0	0
2004	2	11	14	0	0	4.873	0	1.527	0	0
2004	2	11	15	0	0	3.704	0	1.44	0	0
2004	2	11	16	0	0	3.693	0	1.295	0	0
2004	2	11	17	0	0	4.929	0	1.129	0	0
2004	2	11	18	0	0	4.598	0	1.05	0	0
2004	2	11	19	0	0	3.298	0	0.943	0	0
2004	2	11	20	0	0	3.401	0	0.838	0	0
2004	2	11	21	0	0	3.352	0	0.837	0	0
2004	2	11	22	0	0	3.263	0	0.884	0	0
2004	2	11	23	0	0	3.1	0	1.007	0	0
2004	2	12	0	0	0	3.458	0	0.94	0	0
2004	2	12	1	0	0	4.037	0	0.98	0	0
2004	2	12	2	0	0	5.1	0	0.885	0	0
2004	2	12	3	0	0	6.352	0	1.171	0	0
2004	2	12	4	0	0	7.312	0	1.272	0	0
2004	2	12	5	0	0	7.84	0	1.229	0	0
2004	2	12	6	0	0	7.53	0	1.096	0	0
2004	2	12	7	0	0	7.578	0	0.979	0	0
2004	2	12	8	0	0	8.131	0	0.882	0	0
2004	2	12	9	0	0	8.04	0	0.804	0	0
2004	2	12	10	0	0	10.267	0	0.915	0	0
2004	2	12	11	0	0	10.647	0	0.991	0	0
2004	2	12	12	0	0	10.286	0	1.006	0	0
2004	2	12	13	0	0	10.067	0	1.078	0	0
2004	2	12	14	0	0	9.434	0	1.075	0	0
2004	2	12	15	0	0	8.382	0	1.031	0	0
2004	2	12	16	0	0	6.857	0	0.986	0	0
2004	2	12	17	0	0	6.819	0	0.9	0	0
2004	2	12	18	0	0	7.788	0	0.895	0	0
2004	2	12	19	0	0	7.788	0	0.889	0	0
2004	2	12	20	0	0	7.983	0	0.878	0	0
2004	2	12	21	0	0	8.99	0	0.884	0	0
2004	2	12	22	0	0	9.232	0	0.819	0	0
2004	2	12	23	0	0	8.521	0	0.8	0	0
2004	2	13	0	0	0	9.026	0	0.799	0	0
2004	2	13	1	0	0	9.417	0	0.824	0	0
2004	2	13	2	0	0	8.616	0	0.804	0	0
2004	2	13	3	0	0	8.078	0	0.817	0	0
2004	2	13	4	0	0	9.438	0	0.888	0	0
2004	2	13	5	0	0	9.56	0	0.852	0	0
2004	2	13	6	0	0	8.922	0	0.848	0	0
2004	2	13	7	0	0	9.382	0	0.813	0	0
2004	2	13	8	0	0	9.717	0	0.871	0	0
2004	2	13	9	0	0	9.7	0	0.926	0	0
2004	2	13	10	0	0	9.755	0	0.825	0	0
2004	2	13	11	0	0	8.957	0	0.815	0	0
2004	2	13	12	0	0	9.504	0	0.796	0	0
2004	2	13	13	0	0	9.752	0	0.853	0	0
2004	2	13	14	0	0	9.03	0	0.843	0	0
2004	2	13	15	0	0	9.216	0	0.89	0	0
2004	2	13	16	0	0	7.332	0	0.816	0	0
2004	2	13	17	0	0	7.683	0	0.797	0	0
2004	2	13	18	0	0	5.256	0	0.73	0	0
2004	2	13	19	0	0	6.507	0	0.685	0	0
2004	2	13	20	0	0	7.146	0	0.771	0	0
2004	2	13	21	0	0	4.798	0	0.753	0	0
2004	2	13	22	0	0	4.018	0	0.64	0	0
2004	2	13	23	0	0	4.046	0	0.68	0	0
2004	2	14	0	0	0	4.614	0	0.62	0	0
2004	2	14	1	0	0	4.867	0	0.625	0	0
2004	2	14	2	0	0	5.459	0	0.633	0	0
2004	2	14	3	0	0	4.796	0	0.62	0	0
2004	2	14	4	0	0	4.143	0	0.595	0	0
2004	2	14	5	0	0	3.866	0	0.59	0	0
2004	2	14	6	0	0	3.95	0	0.61	0	0
2004	2	14	7	0	0	4.183	0	0.6	0	0
2004	2	14	8	0	0	4.637	0	0.547	0	0
2004	2	14	9	0	0	4.938	0	0.49	0	0
2004	2	14	10	0	0	4.185	0	0.48	0	0
2004	2	14	11	0	0	4.726	0	0.493	0	0
2004	2	14	12	0	0	3.954	0	0.49	0	0
2004	2	14	13	0	0	5.098	0	0.485	0	0
2004	2	14	14	0	0	7.271	0	0.477	0	0
2004	2	14	15	0	0	5.298	0	0.49	0	0
2004	2	14	16	0	0	4.763	0	0.48	0	0
2004	2	14	17	0	0	4.973	0	0.483	0	0
2004	2	14	18	0	0	4.06	0	0.48	0	0
2004	2	14	19	0	0	5	0	0.475	0	0
2004	2	14	20	0	0	4.82	0	0.445	0	0
2004	2	14	21	0	0	4.24	0	0.687	0	0
2004	2	14	22	0	0	3.562	0	0.475	0	0
2004	2	14	23	0	0	3.454	0	0.553	0	0
2004	2	15	0	0	0	3.642	0	0.73	0	0
2004	2	15	1	0	0	3.283	0	0.72	0	0
2004	2	15	2	0	0	2.657	0	0.817	0	0
2004	2	15	3	0	0	2.724	0	0.84	0	0
2004	2	15	4	0	0	2.393	0	0.875	0	0
2004	2	15	5	0	0	2.674	0	0.927	0	0
2004	2	15	6	0	0	1.854	0	0.88	0	0
2004	2	15	7	0	0	1.342	0	0.855	0	0
2004	2	15	8	0	0	0.759	0	0.853	0	0
2004	2	15	9	0	0	1.082	0	0.82	0	0
2004	2	15	10	0	0	2.565	0	0.76	0	0
2004	2	15	11	0	0	3.527	0	0.717	0	0
2004	2	15	12	0	0	2.858	0	0.7	0	0
2004	2	15	13	0	0	1.512	0	0.675	0	0
2004	2	15	14	0	0	1.904	0	0.841	0	0
2004	2	15	15	0	0	3.454	0	1.008	0	0
2004	2	15	16	0	0	3.298	0	0.966	0	0
2004	2	15	17	0	0	3.983	0	0.947	0	0
2004	2	15	18	0	0	4.036	0	0.946	0	0
2004	2	15	19	0	0	3.92	0	0.9	0	0
2004	2	15	20	0	0	3.62	0	0.791	0	0
2004	2	15	21	0	0	4.854	0	1.046	0	0
2004	2	15	22	0	0	5.253	0	1.079	0	0
2004	2	15	23	0	0	4.991	0	1.01	0	0
2004	2	16	0	0	0	4.83	0	0.992	0	0
2004	2	16	1	0	0	6.43	0	1.031	0	0
2004	2	16	2	0	0	6.073	0	1.032	0	0
2004	2	16	3	0	0	4.858	0	1.024	0	0
2004	2	16	4	0	0	4.818	0	0.97	0	0
2004	2	16	5	0	0	6.217	0	0.994	0	0
2004	2	16	6	0	0	6.498	0	1.078	0	0
2004	2	16	7	0	0	5.963	0	1.02	0	0
2004	2	16	8	0	0	5.226	0	0.956	0	0
2004	2	16	9	0	0	4.596	0	0.935	0	0
2004	2	16	10	0	0	4.727	0	0.95	0	0
2004	2	16	11	0	0	4.78	0	0.885	0	0
2004	2	16	12	0	0	4.932	0	0.879	0	0
2004	2	16	13	0	0	4.667	0	0.831	0	0
2004	2	16	14	0	0	5.051	0	0.8	0	0
2004	2	16	15	0	0	5.682	0	0.886	0	0
2004	2	16	16	0	0	5.763	0	0.877	0	0
2004	2	16	17	0	0	5.033	0	0.797	0	0
2004	2	16	18	0	0	6.292	0	0.874	0	0
2004	2	16	19	0	0	6.737	0	0.921	0	0
2004	2	16	20	0	0	7.246	0	0.878	0	0
2004	2	16	21	0	0	8.63	0	0.902	0	0
2004	2	16	22	0	0	7.448	0	0.9	0	0
2004	2	16	23	0	0	6.77	0	0.959	0	0
2004	2	17	0	0	0	7.076	0	0.964	0	0
2004	2	17	1	0	0	7.13	0	0.914	0	0
2004	2	17	2	0	0	7.744	0	0.896	0	0
2004	2	17	3	0	0	8.304	0	0.89	0	0
2004	2	17	4	0	0	7.725	0	0.82	0	0
2004	2	17	5	0	0	8.156	0	0.843	0	0
2004	2	17	6	0	0	8.834	0	0.9	0	0
2004	2	17	7	0	0	11.022	0	0.901	0	0
2004	2	17	8	0	0	10.42	0	0.927	0	0
2004	2	17	9	0	0	9.956	0	1.006	0	0
2004	2	17	10	0	0	8.87	0	1.13	0	0
2004	2	17	11	0	0	8.763	0	1.082	0	0
2004	2	17	12	0	0	9.262	0	1.026	0	0
2004	2	17	13	0	0	10.047	0	1.001	0	0
2004	2	17	14	0	0	9.987	0	1.033	0	0
2004	2	17	15	0	0	10.094	0	1.187	0	0
2004	2	17	16	0	0	10.618	0	1.248	0	0
2004	2	17	17	0	0	12.02	0	1.26	0	0
2004	2	17	18	0	0	13.184	0	1.417	0	0
2004	2	17	19	0	0	12.788	0	1.547	0	0
2004	2	17	20	0	0	13.367	0	1.822	0	0
2004	2	17	21	0	0	13.112	0	2.165	0	0
2004	2	17	22	0	0	13.475	0	2.529	0	0
2004	2	17	23	0	0	14.553	0	2.679	0	0
2004	2	18	0	0	0	13.876	0	2.659	0	0
2004	2	18	1	0	0	13.99	0	2.695	0	0
2004	2	18	2	0	0	13.883	0	2.542	0	0
2004	2	18	3	0	0	13.304	0	2.441	0	0
2004	2	18	4	0	0	12.422	0	2.68	0	0
2004	2	18	5	0	0	13.21	0	2.732	0	0
2004	2	18	6	0	0	12.016	0	2.681	0	0
2004	2	18	7	0	0	10.922	0	2.623	0	0
2004	2	18	8	0	0	9.809	0	2.476	0	0
2004	2	18	9	0	0	9.292	0	2.442	0	0
2004	2	18	10	0	0	7.68	0	2.26	0	0
2004	2	18	11	0	0	7.141	0	2.237	0	0
2004	2	18	12	0	0	7.514	0	2.219	0	0
2004	2	18	13	0	0	7.302	0	2.135	0	0
2004	2	18	14	0	0	6.706	0	2.047	0	0
2004	2	18	15	0	0	8.774	0	2.159	0	0
2004	2	18	16	0	0	9.743	0	2.029	0	0
2004	2	18	17	0	0	11.637	0	2.057	0	0
2004	2	18	18	0	0	10.776	0	2.063	0	0
2004	2	18	19	0	0	12.185	0	2.062	0	0
2004	2	18	20	0	0	14.159	0	2.132	0	0
2004	2	18	21	0	0	14.536	0	2.028	0	0
2004	2	18	22	0	0	13.988	0	1.955	0	0
2004	2	18	23	0	0	13.247	0	1.91	0	0
2004	2	19	0	0	0	12.32	0	1.842	0	0
2004	2	19	1	0	0	12.205	0	1.766	0	0
2004	2	19	2	0	0	11.521	0	1.639	0	0
2004	2	19	3	0	0	10.472	0	1.578	0	0
2004	2	19	4	0	0	10.072	0	1.531	0	0
2004	2	19	5	0	0	9.786	0	1.494	0	0
2004	2	19	6	0	0	9.48	0	1.399	0	0
2004	2	19	7	0	0	9.11	0	1.342	0	0
2004	2	19	8	0	0	8.924	0	1.346	0	0
2004	2	19	9	0	0	8.872	0	1.35	0	0
2004	2	19	10	0	0	8.718	0	1.344	0	0
2004	2	19	11	0	0	8.987	0	1.405	0	0
2004	2	19	12	0	0	9.318	0	1.332	0	0
2004	2	19	13	0	0	9.45	0	1.313	0	0
2004	2	19	14	0	0	9.573	0	1.313	0	0
2004	2	19	15	0	0	9.65	0	1.161	0	0
2004	2	19	16	0	0	10.055	0	1.125	0	0
2004	2	19	17	0	0	10.844	0	1.122	0	0
2004	2	19	18	0	0	10.788	0	1.077	0	0
2004	2	19	19	0	0	10.768	0	1.019	0	0
2004	2	19	20	0	0	10.64	0	1.085	0	0
2004	2	19	21	0	0	9.964	0	1.242	0	0
2004	2	19	22	0	0	9.795	0	1.384	0	0
2004	2	19	23	0	0	9.829	0	1.355	0	0
2004	2	20	0	0	0	8.366	0	1.289	0	0
2004	2	20	1	0	0	8.158	0	1.066	0	0
2004	2	20	2	0	0	8.801	0	0.94	0	0
2004	2	20	3	0	0	8.648	0	0.8	0	0
2004	2	20	4	0	0	8.787	0	0.888	0	0
2004	2	20	5	0	0	9.096	0	1.07	0	0
2004	2	20	6	0	0	9.772	0	0.83	0	0
2004	2	20	7	0	0	10.075	0	0.825	0	0
2004	2	20	8	0	0	10.16	0	0.875	0	0
2004	2	20	9	0	0	11.118	0	0.941	0	0
2004	2	20	10	0	0	11.293	0	1.226	0	0
2004	2	20	11	0	0	11.904	0	1.268	0	0
2004	2	20	12	0	0	11.864	0	1.342	0	0
2004	2	20	13	0	0	11.952	0	1.384	0	0
2004	2	20	14	0	0	13.759	0	1.445	0	0
2004	2	20	15	0	0	15.336	0	1.57	0	0
2004	2	20	16	0	0	15.782	0	1.6	0	0
2004	2	20	17	0	0	15.17	0	1.6	0	0
2004	2	20	18	0	0	16.038	0	1.66	0	0
2004	2	20	19	0	0	17.118	0	1.774	0	0
2004	2	20	20	0	0	16.914	0	1.82	0	0
2004	2	20	21	0	0	15.424	0	1.9	0	0
2004	2	20	22	0	0	14.373	0	1.879	0	0
2004	2	20	23	0	0	13.243	0	1.82	0	0
2004	2	21	0	0	0	12.332	0	1.744	0	0
2004	2	21	1	0	0	11.81	0	1.7	0	0
2004	2	21	2	0	0	11.061	0	1.56	0	0
2004	2	21	3	0	0	9.59	0	1.359	0	0
2004	2	21	4	0	0	8.418	0	1.144	0	0
2004	2	21	5	0	0	7.873	0	1.037	0	0
2004	2	21	6	0	0	7.522	0	0.925	0	0
2004	2	21	7	0	0	7.813	0	0.911	0	0
2004	2	21	8	0	0	8.774	0	0.863	0	0
2004	2	21	9	0	0	7.556	0	0.8	0	0
2004	2	21	10	0	0	7.122	0	0.8	0	0
2004	2	21	11	0	0	6.506	0	0.8	0	0
2004	2	21	12	0	0	6.494	0	0.8	0	0
2004	2	21	13	0	0	6.318	0	0.8	0	0
2004	2	21	14	0	0	7.203	0	0.8	0	0
2004	2	21	15	0	0	7.82	0	0.8	0	0
2004	2	21	16	0	0	7.335	0	0.8	0	0
2004	2	21	17	0	0	6.631	0	0.8	0	0
2004	2	21	18	0	0	7.256	0	0.8	0	0
2004	2	21	19	0	0	7.278	0	0.8	0	0
2004	2	21	20	0	0	6.757	0	0.8	0	0
2004	2	21	21	0	0	6.102	0	0.878	0	0
2004	2	21	22	0	0	6.255	0	0.927	0	0
2004	2	21	23	0	0	7.389	0	1	0	0
2004	2	22	0	0	0	7.36	0	0.988	0	0
2004	2	22	1	0	0	7.897	0	0.9	0	0
2004	2	22	2	0	0	9.006	0	0.9	0	0
2004	2	22	3	0	0	8.49	0	0.882	0	0
2004	2	22	4	0	0	9.492	0	0.8	0	0
2004	2	22	5	0	0	9.956	0	0.8	0	0
2004	2	22	6	0	0	10.244	0	0.831	0	0
2004	2	22	7	0	0	10.26	0	0.913	0	0
2004	2	22	8	0	0	8.989	0	1.2	0	0
2004	2	22	9	0	0	9.896	0	1.3	0	0
2004	2	22	10	0	0	13.598	0	1.358	0	0
2004	2	22	11	0	0	15.94	0	1.671	0	0
2004	2	22	12	0	0	16.17	0	2.053	0	0
2004	2	22	13	0	0	15.995	0	2.528	0	0
2004	2	22	14	0	0	14.949	0	2.85	0	0
2004	2	22	15	0	0	14.948	0	3.063	0	0
2004	2	22	16	0	0	14.858	0	3.037	0	0
2004	2	22	17	0	0	14.866	0	3.165	0	0
2004	2	22	18	0	0	13.28	0	3.163	0	0
2004	2	22	19	0	0	14.57	0	3.46	0	0
2004	2	22	20	0	0	15.434	0	3.516	0	0
2004	2	22	21	0	0	16.05	0	3.483	0	0
2004	2	22	22	0	0	14.333	0	3.442	0	0
2004	2	22	23	0	0	12.781	0	3.405	0	0
2004	2	23	0	0	0	14.74	0	3.56	0	0
2004	2	23	1	0	0	15.403	0	3.49	0	0
2004	2	23	2	0	0	15.204	0	3.639	0	0
2004	2	23	3	0	0	15.058	0	3.616	0	0
2004	2	23	4	0	0	14.67	0	3.55	0	0
2004	2	23	5	0	0	14.287	0	3.495	0	0
2004	2	23	6	0	0	13.4	0	3.321	0	0
2004	2	23	7	0	0	12.822	0	3.255	0	0
2004	2	23	8	0	0	12.401	0	3.247	0	0
2004	2	23	9	0	0	11.336	0	3.206	0	0
2004	2	23	10	0	0	11.282	0	3.145	0	0
2004	2	23	11	0	0	10.797	0	3.13	0	0
2004	2	23	12	0	0	9.896	0	3.074	0	0
2004	2	23	13	0	0	9.11	0	3.021	0	0
2004	2	23	14	0	0	7.67	0	2.9	0	0
2004	2	23	15	0	0	7.964	0	2.826	0	0
2004	2	23	16	0	0	8.958	0	2.93	0	0
2004	2	23	17	0	0	8.323	0	2.68	0	0
2004	2	23	18	0	0	7.968	0	2.443	0	0
2004	2	23	19	0	0	7.318	0	2.457	0	0
2004	2	23	20	0	0	6.264	0	2.495	0	0
2004	2	23	21	0	0	5.406	0	2.33	0	0
2004	2	23	22	0	0	4.178	0	1.995	0	0
2004	2	23	23	0	0	6.334	0	2.143	0	0
2004	2	24	0	0	0	5.954	0	2.039	0	0
2004	2	24	1	0	0	5.998	0	1.758	0	0
2004	2	24	2	0	0	8.311	0	1.976	0	0
2004	2	24	3	0	0	9.962	0	2.016	0	0
2004	2	24	4	0	0	11.755	0	1.959	0	0
2004	2	24	5	0	0	11.719	0	1.783	0	0
2004	2	24	6	0	0	14.518	0	1.685	0	0
2004	2	24	7	0	0	15.79	0	1.32	0	0
2004	2	24	8	0	0	15.664	0	1.685	0	0
2004	2	24	9	0	0	17.522	0	1.965	0	0
2004	2	24	10	0	0	18.178	0	2.122	0	0
2004	2	24	11	0	0	18.59	0	2.195	0	0
2004	2	24	12	0	0	15.136	0	1.678	0	0
2004	2	24	13	0	0	8.218	0	1.853	0	0
2004	2	24	14	0	0	7.454	0	1.72	0	0
2004	2	24	15	0	0	9.704	0	2.17	0	0
2004	2	24	16	0	0	7.003	0	2.067	0	0
2004	2	24	17	0	0	6.737	0	2.414	0	0
2004	2	24	18	0	0	7.438	0	2.342	0	0
2004	2	24	19	0	0	8.265	0	2.32	0	0
2004	2	24	20	0	0	8.453	0	2.325	0	0
2004	2	24	21	0	0	9.172	0	2.275	0	0
2004	2	24	22	0	0	9.468	0	2.45	0	0
2004	2	24	23	0	0	10.317	0	3.055	0	0
2004	2	25	0	0	0	8.372	0	3.065	0	0
2004	2	25	1	0	0	9.95	0	3.047	0	0
2004	2	25	2	0	0	11.14	0	3.23	0	0
2004	2	25	3	0	0	10.2	0	3.163	0	0
2004	2	25	4	0	0	10.593	0	3.065	0	0
2004	2	25	5	0	0	9.313	0	3.005	0	0
2004	2	25	6	0	0	10.35	0	3.206	0	0
2004	2	25	7	0	0	9.758	0	3.03	0	0
2004	2	25	8	0	0	10.771	0	3.005	0	0
2004	2	25	9	0	0	8.54	0	2.884	0	0
2004	2	25	10	0	0	10.048	0	2.863	0	0
2004	2	25	11	0	0	10.903	0	2.816	0	0
2004	2	25	12	0	0	9.706	0	2.744	0	0
2004	2	25	13	0	0	11.132	0	2.653	0	0
2004	2	25	14	0	0	11.784	0	2.55	0	0
2004	2	25	15	0	0	10.246	0	2.443	0	0
2004	2	25	16	0	0	11.858	0	2.34	0	0
2004	2	25	17	0	0	12.607	0	2.232	0	0
2004	2	25	18	0	0	11.612	0	2.274	0	0
2004	2	25	19	0	0	11.69	0	2.4	0	0
2004	2	25	20	0	0	10.351	0	2.352	0	0
2004	2	25	21	0	0	8.734	0	2.284	0	0
2004	2	25	22	0	0	8.83	0	2.37	0	0
2004	2	25	23	0	0	10.97	0	2.5	0	0
2004	2	26	0	0	0	9.096	0	2.187	0	0
2004	2	26	1	0	0	9.435	0	2.25	0	0
2004	2	26	2	0	0	8.641	0	2.209	0	0
2004	2	26	3	0	0	8.342	0	2.267	0	0
2004	2	26	4	0	0	8.278	0	2.274	0	0
2004	2	26	5	0	0	8.767	0	2.205	0	0
2004	2	26	6	0	0	9.528	0	2.15	0	0
2004	2	26	7	0	0	10.285	0	2.127	0	0
2004	2	26	8	0	0	9.487	0	2.017	0	0
2004	2	26	9	0	0	9.954	0	2	0	0
2004	2	26	10	0	0	9.873	0	1.889	0	0
2004	2	26	11	0	0	8.097	0	1.905	0	0
2004	2	26	12	0	0	6.97	0	1.9	0	0
2004	2	26	13	0	0	5.81	0	1.78	0	0
2004	2	26	14	0	0	5.554	0	1.705	0	0
2004	2	26	15	0	0	5.402	0	1.717	0	0
2004	2	26	16	0	0	6.993	0	1.961	0	0
2004	2	26	17	0	0	7.314	0	2.053	0	0
2004	2	26	18	0	0	7.2	0	2.18	0	0
2004	2	26	19	0	0	6.635	0	2.121	0	0
2004	2	26	20	0	0	7.176	0	2.15	0	0
2004	2	26	21	0	0	8.988	0	2.259	0	0
2004	2	26	22	0	0	8.678	0	2.205	0	0
2004	2	26	23	0	0	7.899	0	2.095	0	0
2004	2	27	0	0	0	7.42	0	1.958	0	0
2004	2	27	1	0	0	8.353	0	1.95	0	0
2004	2	27	2	0	0	9.233	0	2.09	0	0
2004	2	27	3	0	0	8.816	0	2.033	0	0
2004	2	27	4	0	0	8.375	0	1.837	0	0
2004	2	27	5	0	0	7.77	0	1.832	0	0
2004	2	27	6	0	0	6.43	0	1.668	0	0
2004	2	27	7	0	0	5.967	0	1.52	0	0
2004	2	27	8	0	0	6.424	0	1.595	0	0
2004	2	27	9	0	0	6.938	0	1.617	0	0
2004	2	27	10	0	0	6.143	0	1.52	0	0
2004	2	27	11	0	0	6.267	0	1.533	0	0
2004	2	27	12	0	0	6.408	0	1.6	0	0
2004	2	27	13	0	0	6.027	0	1.6	0	0
2004	2	27	14	0	0	5.663	0	1.52	0	0
2004	2	27	15	0	0	5.6	0	1.584	0	0
2004	2	27	16	0	0	5.557	0	1.579	0	0
2004	2	27	17	0	0	4.676	0	1.375	0	0
2004	2	27	18	0	0	4.208	0	1.268	0	0
2004	2	27	19	0	0	3.947	0	1.211	0	0
2004	2	27	20	0	0	3.329	0	0.993	0	0
2004	2	27	21	0	0	2.846	0	0.8	0	0
2004	2	27	22	0	0	3.658	0	0.978	0	0
2004	2	27	23	0	0	3.469	0	0.882	0	0
2004	2	28	0	0	0	3.658	0	0.92	0	0
2004	2	28	1	0	0	3.352	0	0.843	0	0
2004	2	28	2	0	0	2.663	0	0.824	0	0
2004	2	28	3	0	0	2.342	0	0.81	0	0
2004	2	28	4	0	0	2.122	0	0.803	0	0
2004	2	28	5	0	0	2.296	0	0.8	0	0
2004	2	28	6	0	0	1.502	0	0.8	0	0
2004	2	28	7	0	0	1.717	0	0.813	0	0
2004	2	28	8	0	0	1.024	0	0.85	0	0
2004	2	28	9	0	0	0.658	0	0.907	0	0
2004	2	28	10	0	0	0.912	0	0.98	0	0
2004	2	28	11	0	0	2.611	0	1.067	0	0
2004	2	28	12	0	0	2.89	0	1.235	0	0
2004	2	28	13	0	0	1.483	0	0.8	0	0
2004	2	28	14	0	0	1.169	0	0.802	0	0
2004	2	28	15	0	0	0.97	0	0.809	0	0
2004	2	28	16	0	0	1.66	0	0.82	0	0
2004	2	28	17	0	0	2.046	0	0.838	0	0
2004	2	28	18	0	0	3.002	0	0.861	0	0
2004	2	28	19	0	0	3.747	0	0.892	0	0
2004	2	28	20	0	0	4.266	0	1.031	0	0
2004	2	28	21	0	0	3.614	0	0.947	0	0
2004	2	28	22	0	0	3.657	0	0.969	0	0
2004	2	28	23	0	0	4.644	0	1.36	0	0
2004	2	29	0	0	0	5.456	0	1.62	0	0
2004	2	29	1	0	0	6.668	0	1.867	0	0
2004	2	29	2	0	0	6.214	0	1.85	0	0
2004	2	29	3	0	0	7.104	0	1.84	0	0
2004	2	29	4	0	0	8.177	0	1.86	0	0
2004	2	29	5	0	0	8.766	0	1.745	0	0
2004	2	29	6	0	0	8.812	0	1.54	0	0
2004	2	29	7	0	0	9.182	0	1.489	0	0
2004	2	29	8	0	0	9.361	0	1.348	0	0
2004	2	29	9	0	0	9.38	0	1.2	0	0
2004	2	29	10	0	0	10.472	0	1.14	0	0
2004	2	29	11	0	0	9.963	0	1.14	0	0
2004	2	29	12	0	0	9.252	0	1.106	0	0
2004	2	29	13	0	0	8.695	0	1.1	0	0
2004	2	29	14	0	0	7.597	0	1.111	0	0
2004	2	29	15	0	0	6.634	0	1.18	0	0
2004	2	29	16	0	0	6.347	0	1.27	0	0
2004	2	29	17	0	0	6.193	0	1.3	0	0
2004	2	29	18	0	0	6.544	0	1.395	0	0
2004	2	29	19	0	0	6.953	0	1.384	0	0
2004	2	29	20	0	0	6.62	0	1.23	0	0
2004	2	29	21	0	0	6.276	0	1.268	0	0
2004	2	29	22	0	0	6.322	0	1.225	0	0
2004	2	29	23	0	0	5.606	0	1.157	0	0
2004	3	1	0	0	0	4.31	0	0.953	0	0
2004	3	1	1	0	0	4.127	0	0.945	0	0
2004	3	1	2	0	0	4.219	0	1.05	0	0
2004	3	1	3	0	0	4.044	0	1.137	0	0
2004	3	1	4	0	0	4.637	0	1.16	0	0
2004	3	1	5	0	0	6.019	0	1.237	0	0
2004	3	1	6	0	0	6.394	0	1.245	0	0
2004	3	1	7	0	0	6.945	0	1.158	0	0
2004	3	1	8	0	0	7.276	0	1.1	0	0
2004	3	1	9	0	0	7.284	0	1.1	0	0
2004	3	1	10	0	0	8.153	0	1.021	0	0
2004	3	1	11	0	0	9.597	0	0.96	0	0
2004	3	1	12	0	0	10.976	0	0.816	0	0
2004	3	1	13	0	0	11.65	0	0.921	0	0
2004	3	1	14	0	0	12.57	0	1.265	0	0
2004	3	1	15	0	0	12.996	0	1.345	0	0
2004	3	1	16	0	0	13.877	0	1.585	0	0
2004	3	1	17	0	0	14.049	0	1.845	0	0
2004	3	1	18	0	0	13.678	0	1.99	0	0
2004	3	1	19	0	0	13.555	0	2.1	0	0
2004	3	1	20	0	0	13.517	0	2.184	0	0
2004	3	1	21	0	0	13.182	0	2.3	0	0
2004	3	1	22	0	0	12.95	0	2.163	0	0
2004	3	1	23	0	0	12.437	0	2.18	0	0
2004	3	2	0	0	0	12.338	0	2.126	0	0
2004	3	2	1	0	0	13.143	0	2.195	0	0
2004	3	2	2	0	0	13.044	0	2.222	0	0
2004	3	2	3	0	0	12.87	0	2.16	0	0
2004	3	2	4	0	0	12.115	0	2.16	0	0
2004	3	2	5	0	0	10.543	0	2.1	0	0
2004	3	2	6	0	0	10.138	0	2.015	0	0
2004	3	2	7	0	0	9.375	0	1.99	0	0
2004	3	2	8	0	0	9.743	0	1.94	0	0
2004	3	2	9	0	0	11.918	0	1.981	0	0
2004	3	2	10	0	0	12.188	0	1.807	0	0
2004	3	2	11	0	0	12.056	0	1.8	0	0
2004	3	2	12	0	0	11.596	0	1.833	0	0
2004	3	2	13	0	0	10.417	0	1.784	0	0
2004	3	2	14	0	0	10.734	0	1.768	0	0
2004	3	2	15	0	0	10.864	0	1.8	0	0
2004	3	2	16	0	0	11.402	0	1.837	0	0
2004	3	2	17	0	0	10.734	0	1.865	0	0
2004	3	2	18	0	0	10.592	0	1.775	0	0
2004	3	2	19	0	0	9.683	0	1.82	0	0
2004	3	2	20	0	0	11.631	0	1.885	0	0
2004	3	2	21	0	0	11.234	0	1.915	0	0
2004	3	2	22	0	0	10.12	0	1.884	0	0
2004	3	2	23	0	0	10.137	0	1.9	0	0
2004	3	3	0	0	0	9.918	0	1.9	0	0
2004	3	3	1	0	0	10.49	0	1.953	0	0
2004	3	3	2	0	0	9.463	0	1.895	0	0
2004	3	3	3	0	0	9.782	0	1.861	0	0
2004	3	3	4	0	0	9.845	0	1.859	0	0
2004	3	3	5	0	0	8.94	0	1.9	0	0
2004	3	3	6	0	0	8.384	0	1.9	0	0
2004	3	3	7	0	0	7.813	0	1.85	0	0
2004	3	3	8	0	0	6.369	0	1.8	0	0
2004	3	3	9	0	0	4.02	0	1.637	0	0
2004	3	3	10	0	0	3.393	0	1.372	0	0
2004	3	3	11	0	0	3.476	0	1.224	0	0
2004	3	3	12	0	0	3.998	0	1.3	0	0
2004	3	3	13	0	0	3.738	0	1.195	0	0
2004	3	3	14	0	0	2.573	0	0.933	0	0
2004	3	3	15	0	0	1.446	0	0.902	0	0
2004	3	3	16	0	0	0.99	0	0.876	0	0
2004	3	3	17	0	0	1.62	0	0.855	0	0
2004	3	3	18	0	0	2.384	0	0.838	0	0
2004	3	3	19	0	0	2.993	0	0.825	0	0
2004	3	3	20	0	0	3.609	0	0.815	0	0
2004	3	3	21	0	0	4.192	0	0.808	0	0
2004	3	3	22	0	0	4.358	0	0.803	0	0
2004	3	3	23	0	0	4.756	0	0.801	0	0
2004	3	4	0	0	0	5.544	0	0.8	0	0
2004	3	4	1	0	0	6.892	0	0.8	0	0
2004	3	4	2	0	0	8.884	0	0.8	0	0
2004	3	4	3	0	0	9.556	0	0.8	0	0
2004	3	4	4	0	0	9.312	0	0.8	0	0
2004	3	4	5	0	0	9.43	0	0.8	0	0
2004	3	4	6	0	0	9.286	0	0.826	0	0
2004	3	4	7	0	0	9.003	0	0.9	0	0
2004	3	4	8	0	0	8.726	0	0.905	0	0
2004	3	4	9	0	0	9.112	0	0.879	0	0
2004	3	4	10	0	0	8.468	0	0.878	0	0
2004	3	4	11	0	0	9.519	0	0.875	0	0
2004	3	4	12	0	0	10.862	0	0.835	0	0
2004	3	4	13	0	0	11.06	0	0.855	0	0
2004	3	4	14	0	0	11.194	0	0.842	0	0
2004	3	4	15	0	0	11.716	0	0.922	0	0
2004	3	4	16	0	0	12.155	0	1.092	0	0
2004	3	4	17	0	0	12.529	0	1.17	0	0
2004	3	4	18	0	0	12.46	0	1.284	0	0
2004	3	4	19	0	0	14.008	0	1.39	0	0
2004	3	4	20	0	0	14.643	0	1.4	0	0
2004	3	4	21	0	0	14.894	0	1.437	0	0
2004	3	4	22	0	0	14.838	0	1.539	0	0
2004	3	4	23	0	0	14.483	0	1.686	0	0
2004	3	5	0	0	0	14.514	0	1.7	0	0
2004	3	5	1	0	0	14.018	0	1.665	0	0
2004	3	5	2	0	0	14.256	0	1.585	0	0
2004	3	5	3	0	0	14.096	0	1.515	0	0
2004	3	5	4	0	0	14.187	0	1.52	0	0
2004	3	5	5	0	0	14.607	0	1.56	0	0
2004	3	5	6	0	0	14.902	0	1.545	0	0
2004	3	5	7	0	0	14.83	0	1.611	0	0
2004	3	5	8	0	0	14.084	0	1.7	0	0
2004	3	5	9	0	0	13.284	0	1.674	0	0
2004	3	5	10	0	0	11.263	0	1.616	0	0
2004	3	5	11	0	0	9.8	0	1.505	0	0
2004	3	5	12	0	0	9.122	0	1.421	0	0
2004	3	5	13	0	0	9.202	0	1.365	0	0
2004	3	5	14	0	0	10.171	0	1.25	0	0
2004	3	5	15	0	0	10.342	0	1.095	0	0
2004	3	5	16	0	0	10.443	0	0.942	0	0
2004	3	5	17	0	0	10.654	0	0.98	0	0
2004	3	5	18	0	0	11.094	0	1.075	0	0
2004	3	5	19	0	0	10.812	0	1.16	0	0
2004	3	5	20	0	0	10.914	0	1.115	0	0
2004	3	5	21	0	0	10.894	0	1.135	0	0
2004	3	5	22	0	0	10.405	0	1.14	0	0
2004	3	5	23	0	0	9.106	0	1.1	0	0
2004	3	6	0	0	0	8.394	0	1.1	0	0
2004	3	6	1	0	0	7.638	0	1	0	0
2004	3	6	2	0	0	6.721	0	0.925	0	0
2004	3	6	3	0	0	5.548	0	0.853	0	0
2004	3	6	4	0	0	4.477	0	0.8	0	0
2004	3	6	5	0	0	4.801	0	0.8	0	0
2004	3	6	6	0	0	4.328	0	0.8	0	0
2004	3	6	7	0	0	4.308	0	0.8	0	0
2004	3	6	8	0	0	3.331	0	0.8	0	0
2004	3	6	9	0	0	3.596	0	0.8	0	0
2004	3	6	10	0	0	4.155	0	0.8	0	0
2004	3	6	11	0	0	4.711	0	0.8	0	0
2004	3	6	12	0	0	4.794	0	0.8	0	0
2004	3	6	13	0	0	4.023	0	0.8	0	0
2004	3	6	14	0	0	3.46	0	0.8	0	0
2004	3	6	15	0	0	3.764	0	0.8	0	0
2004	3	6	16	0	0	3.197	0	0.8	0	0
2004	3	6	17	0	0	4.33	0	0.801	0	0
2004	3	6	18	0	0	4.736	0	0.801	0	0
2004	3	6	19	0	0	5.808	0	0.801	0	0
2004	3	6	20	0	0	6.29	0	0.801	0	0
2004	3	6	21	0	0	6.866	0	0.801	0	0
2004	3	6	22	0	0	6.13	0	0.801	0	0
2004	3	6	23	0	0	5.401	0	0.802	0	0
2004	3	7	0	0	0	5.42	0	0.802	0	0
2004	3	7	1	0	0	4.933	0	0.802	0	0
2004	3	7	2	0	0	3.793	0	0.802	0	0
2004	3	7	3	0	0	4.574	0	0.803	0	0
2004	3	7	4	0	0	4.588	0	0.803	0	0
2004	3	7	5	0	0	4.181	0	0.804	0	0
2004	3	7	6	0	0	3.314	0	0.804	0	0
2004	3	7	7	0	0	3.052	0	0.805	0	0
2004	3	7	8	0	0	3.051	0	0.805	0	0
2004	3	7	9	0	0	3.284	0	0.806	0	0
2004	3	7	10	0	0	3.733	0	0.806	0	0
2004	3	7	11	0	0	4.026	0	0.807	0	0
2004	3	7	12	0	0	4.83	0	0.807	0	0
2004	3	7	13	0	0	5.682	0	0.808	0	0
2004	3	7	14	0	0	6.401	0	0.809	0	0
2004	3	7	15	0	0	5.878	0	0.81	0	0
2004	3	7	16	0	0	6.34	0	0.811	0	0
2004	3	7	17	0	0	6.696	0	0.811	0	0
2004	3	7	18	0	0	6.682	0	0.812	0	0
2004	3	7	19	0	0	7.065	0	0.813	0	0
2004	3	7	20	0	0	7.376	0	0.814	0	0
2004	3	7	21	0	0	6.852	0	0.816	0	0
2004	3	7	22	0	0	6.56	0	0.817	0	0
2004	3	7	23	0	0	6.549	0	0.886	0	0
2004	3	8	0	0	0	6.282	0	0.989	0	0
2004	3	8	1	0	0	5.633	0	1.03	0	0
2004	3	8	2	0	0	5.533	0	1.1	0	0
2004	3	8	3	0	0	5.196	0	1.125	0	0
2004	3	8	4	0	0	5.325	0	1.253	0	0
2004	3	8	5	0	0	6.354	0	1.355	0	0
2004	3	8	6	0	0	6.578	0	1.389	0	0
2004	3	8	7	0	0	5.978	0	1.4	0	0
2004	3	8	8	0	0	6.247	0	1.4	0	0
2004	3	8	9	0	0	6.624	0	1.4	0	0
2004	3	8	10	0	0	6.557	0	1.305	0	0
2004	3	8	11	0	0	6.77	0	1.276	0	0
2004	3	8	12	0	0	7.018	0	1.289	0	0
2004	3	8	13	0	0	6.232	0	1.239	0	0
2004	3	8	14	0	0	5.446	0	1.215	0	0
2004	3	8	15	0	0	7.09	0	1.353	0	0
2004	3	8	16	0	0	6.708	0	1.3	0	0
2004	3	8	17	0	0	8.66	0	1.406	0	0
2004	3	8	18	0	0	10.014	0	1.4	0	0
2004	3	8	19	0	0	10.985	0	1.333	0	0
2004	3	8	20	0	0	11.903	0	1.3	0	0
2004	3	8	21	0	0	13.26	0	1.3	0	0
2004	3	8	22	0	0	12.883	0	1.3	0	0
2004	3	8	23	0	0	12.561	0	1.395	0	0
2004	3	9	0	0	0	10.588	0	1.647	0	0
2004	3	9	1	0	0	9.773	0	1.711	0	0
2004	3	9	2	0	0	11.181	0	1.705	0	0
2004	3	9	3	0	0	11.238	0	1.7	0	0
2004	3	9	4	0	0	10.805	0	1.605	0	0
2004	3	9	5	0	0	10.24	0	1.47	0	0
2004	3	9	6	0	0	9.982	0	1.4	0	0
2004	3	9	7	0	0	10.093	0	1.305	0	0
2004	3	9	8	0	0	11.124	0	1.3	0	0
2004	3	9	9	0	0	11.854	0	1.3	0	0
2004	3	9	10	0	0	11.373	0	1.3	0	0
2004	3	9	11	0	0	10.226	0	1.3	0	0
2004	3	9	12	0	0	10.56	0	1.3	0	0
2004	3	9	13	0	0	11.062	0	1.347	0	0
2004	3	9	14	0	0	11.003	0	1.38	0	0
2004	3	9	15	0	0	11.188	0	1.4	0	0
2004	3	9	16	0	0	11.585	0	1.405	0	0
2004	3	9	17	0	0	11.849	0	1.361	0	0
2004	3	9	18	0	0	11.958	0	1.326	0	0
2004	3	9	19	0	0	12.117	0	1.355	0	0
2004	3	9	20	0	0	13.21	0	1.314	0	0
2004	3	9	21	0	0	13.464	0	1.4	0	0
2004	3	9	22	0	0	13.282	0	1.511	0	0
2004	3	9	23	0	0	12.809	0	1.689	0	0
2004	3	10	0	0	0	12.714	0	1.709	0	0
2004	3	10	1	0	0	12.54	0	1.74	0	0
2004	3	10	2	0	0	12.797	0	1.745	0	0
2004	3	10	3	0	0	12.556	0	1.7	0	0
2004	3	10	4	0	0	12.612	0	1.711	0	0
2004	3	10	5	0	0	13.061	0	1.637	0	0
2004	3	10	6	0	0	13.114	0	1.635	0	0
2004	3	10	7	0	0	13.063	0	1.621	0	0
2004	3	10	8	0	0	12.99	0	1.647	0	0
2004	3	10	9	0	0	13.444	0	1.7	0	0
2004	3	10	10	0	0	13.707	0	1.789	0	0
2004	3	10	11	0	0	13.16	0	1.9	0	0
2004	3	10	12	0	0	13.394	0	1.9	0	0
2004	3	10	13	0	0	13.547	0	1.9	0	0
2004	3	10	14	0	0	14.177	0	1.9	0	0
2004	3	10	15	0	0	14.314	0	2	0	0
2004	3	10	16	0	0	14.228	0	2.1	0	0
2004	3	10	17	0	0	14.756	0	2.037	0	0
2004	3	10	18	0	0	13.766	0	1.894	0	0
2004	3	10	19	0	0	13.97	0	1.811	0	0
2004	3	10	20	0	0	13.003	0	1.81	0	0
2004	3	10	21	0	0	11.77	0	1.772	0	0
2004	3	10	22	0	0	10.943	0	1.721	0	0
2004	3	10	23	0	0	10.634	0	1.78	0	0
2004	3	11	0	0	0	9.32	0	1.7	0	0
2004	3	11	1	0	0	9.717	0	1.66	0	0
2004	3	11	2	0	0	10.233	0	1.49	0	0
2004	3	11	3	0	0	9.724	0	1.465	0	0
2004	3	11	4	0	0	10.023	0	1.429	0	0
2004	3	11	5	0	0	9.196	0	1.368	0	0
2004	3	11	6	0	0	8.962	0	1.24	0	0
2004	3	11	7	0	0	8.915	0	1.1	0	0
2004	3	11	8	0	0	8.86	0	1.02	0	0
2004	3	11	9	0	0	8.094	0	1	0	0
2004	3	11	10	0	0	7.275	0	0.937	0	0
2004	3	11	11	0	0	7.719	0	0.9	0	0
2004	3	11	12	0	0	7.726	0	0.942	0	0
2004	3	11	13	0	0	7.76	0	1.02	0	0
2004	3	11	14	0	0	7.64	0	1.061	0	0
2004	3	11	15	0	0	8.626	0	1.05	0	0
2004	3	11	16	0	0	8.525	0	0.954	0	0
2004	3	11	17	0	0	8.917	0	0.909	0	0
2004	3	11	18	0	0	9.568	0	0.843	0	0
2004	3	11	19	0	0	9.908	0	0.862	0	0
2004	3	11	20	0	0	9.631	0	1.04	0	0
2004	3	11	21	0	0	11.012	0	0.812	0	0
2004	3	11	22	0	0	11.203	0	0.816	0	0
2004	3	11	23	0	0	11.654	0	0.839	0	0
2004	3	12	0	0	0	11.682	0	0.986	0	0
2004	3	12	1	0	0	12.067	0	1.258	0	0
2004	3	12	2	0	0	10.953	0	1.31	0	0
2004	3	12	3	0	0	11.228	0	1.375	0	0
2004	3	12	4	0	0	11.792	0	1.372	0	0
2004	3	12	5	0	0	12.104	0	1.314	0	0
2004	3	12	6	0	0	12.434	0	1.19	0	0
2004	3	12	7	0	0	11.8	0	1.085	0	0
2004	3	12	8	0	0	10.777	0	1.134	0	0
2004	3	12	9	0	0	11.142	0	1.168	0	0
2004	3	12	10	0	0	10.348	0	1.196	0	0
2004	3	12	11	0	0	9.391	0	1.277	0	0
2004	3	12	12	0	0	9.52	0	1.234	0	0
2004	3	12	13	0	0	8.705	0	1.203	0	0
2004	3	12	14	0	0	9.589	0	1.262	0	0
2004	3	12	15	0	0	10.442	0	1.204	0	0
2004	3	12	16	0	0	12.203	0	1.219	0	0
2004	3	12	17	0	0	12.771	0	1.112	0	0
2004	3	12	18	0	0	12.018	0	0.996	0	0
2004	3	12	19	0	0	12.205	0	0.907	0	0
2004	3	12	20	0	0	12.034	0	0.839	0	0
2004	3	12	21	0	0	12.742	0	1.05	0	0
2004	3	12	22	0	0	11.302	0	0.975	0	0
2004	3	12	23	0	0	10.389	0	0.963	0	0
2004	3	13	0	0	0	10.594	0	0.819	0	0
2004	3	13	1	0	0	10.592	0	0.921	0	0
2004	3	13	2	0	0	11.407	0	0.997	0	0
2004	3	13	3	0	0	11.57	0	0.951	0	0
2004	3	13	4	0	0	11.618	0	0.838	0	0
2004	3	13	5	0	0	11.6	0	0.887	0	0
2004	3	13	6	0	0	11.802	0	0.97	0	0
2004	3	13	7	0	0	12.465	0	0.955	0	0
2004	3	13	8	0	0	13.474	0	0.973	0	0
2004	3	13	9	0	0	13.366	0	0.835	0	0
2004	3	13	10	0	0	14.198	0	0.832	0	0
2004	3	13	11	0	0	12.546	0	0.861	0	0
2004	3	13	12	0	0	15.32	0	0.808	0	0
2004	3	13	13	0	0	17.13	0	0.806	0	0
2004	3	13	14	0	0	18.939	0	1.046	0	0
2004	3	13	15	0	0	18.374	0	1.48	0	0
2004	3	13	16	0	0	17.907	0	1.871	0	0
2004	3	13	17	0	0	16.304	0	1.995	0	0
2004	3	13	18	0	0	14.458	0	1.727	0	0
2004	3	13	19	0	0	14.248	0	1.641	0	0
2004	3	13	20	0	0	14.267	0	1.611	0	0
2004	3	13	21	0	0	14.378	0	1.518	0	0
2004	3	13	22	0	0	14.745	0	1.49	0	0
2004	3	13	23	0	0	15.459	0	1.479	0	0
2004	3	14	0	0	0	15.472	0	1.419	0	0
2004	3	14	1	0	0	15.552	0	1.413	0	0
2004	3	14	2	0	0	15.923	0	1.351	0	0
2004	3	14	3	0	0	15.254	0	1.305	0	0
2004	3	14	4	0	0	14.31	0	1.345	0	0
2004	3	14	5	0	0	14.471	0	1.297	0	0
2004	3	14	6	0	0	15.432	0	1.296	0	0
2004	3	14	7	0	0	15.025	0	1.294	0	0
2004	3	14	8	0	0	15.424	0	1.239	0	0
2004	3	14	9	0	0	15.232	0	1.177	0	0
2004	3	14	10	0	0	15.118	0	0.933	0	0
2004	3	14	11	0	0	15.047	0	1.044	0	0
2004	3	14	12	0	0	16.074	0	1.066	0	0
2004	3	14	13	0	0	16.273	0	1.318	0	0
2004	3	14	14	0	0	17.647	0	1.542	0	0
2004	3	14	15	0	0	17.296	0	1.623	0	0
2004	3	14	16	0	0	17.447	0	1.616	0	0
2004	3	14	17	0	0	18.73	0	1.698	0	0
2004	3	14	18	0	0	19.28	0	1.68	0	0
2004	3	14	19	0	0	19.56	0	1.354	0	0
2004	3	14	20	0	0	20.007	0	1.668	0	0
2004	3	14	21	0	0	19.502	0	1.796	0	0
2004	3	14	22	0	0	19.483	0	1.846	0	0
2004	3	14	23	0	0	19.861	0	2.111	0	0
2004	3	15	0	0	0	19.548	0	2.069	0	0
2004	3	15	1	0	0	20.578	0	2.402	0	0
2004	3	15	2	0	0	19.986	0	2.569	0	0
2004	3	15	3	0	0	18.99	0	2.589	0	0
2004	3	15	4	0	0	18.202	0	2.436	0	0
2004	3	15	5	0	0	17.657	0	2.397	0	0
2004	3	15	6	0	0	17.042	0	2.244	0	0
2004	3	15	7	0	0	16.448	0	2.112	0	0
2004	3	15	8	0	0	16.246	0	2.033	0	0
2004	3	15	9	0	0	15.616	0	1.836	0	0
2004	3	15	10	0	0	15.122	0	1.73	0	0
2004	3	15	11	0	0	15.507	0	1.647	0	0
2004	3	15	12	0	0	15.692	0	1.632	0	0
2004	3	15	13	0	0	15.498	0	1.528	0	0
2004	3	15	14	0	0	16.979	0	1.57	0	0
2004	3	15	15	0	0	17.52	0	1.481	0	0
2004	3	15	16	0	0	19.257	0	1.617	0	0
2004	3	15	17	0	0	20.726	0	1.692	0	0
2004	3	15	18	0	0	21.352	0	1.624	0	0
2004	3	15	19	0	0	20.458	0	1.734	0	0
2004	3	15	20	0	0	20.246	0	1.922	0	0
2004	3	15	21	0	0	20.64	0	2.052	0	0
2004	3	15	22	0	0	20.527	0	2.061	0	0
2004	3	15	23	0	0	19.507	0	2.122	0	0
2004	3	16	0	0	0	20.11	0	2.105	0	0
2004	3	16	1	0	0	20.053	0	2.182	0	0
2004	3	16	2	0	0	18.489	0	2.011	0	0
2004	3	16	3	0	0	17.918	0	1.922	0	0
2004	3	16	4	0	0	18.113	0	1.954	0	0
2004	3	16	5	0	0	18.124	0	1.926	0	0
2004	3	16	6	0	0	17.102	0	1.856	0	0
2004	3	16	7	0	0	16.2	0	1.782	0	0
2004	3	16	8	0	0	17.627	0	1.612	0	0
2004	3	16	9	0	0	17.9	0	1.709	0	0
2004	3	16	10	0	0	16.92	0	1.61	0	0
2004	3	16	11	0	0	16.141	0	1.583	0	0
2004	3	16	12	0	0	15.588	0	1.606	0	0
2004	3	16	13	0	0	16.345	0	1.59	0	0
2004	3	16	14	0	0	16.846	0	1.567	0	0
2004	3	16	15	0	0	17.34	0	1.463	0	0
2004	3	16	16	0	0	16.61	0	1.4	0	0
2004	3	16	17	0	0	17.059	0	1.433	0	0
2004	3	16	18	0	0	19.13	0	1.484	0	0
2004	3	16	19	0	0	19.292	0	1.4	0	0
2004	3	16	20	0	0	15.92	0	1.347	0	0
2004	3	16	21	0	0	15.488	0	1.3	0	0
2004	3	16	22	0	0	15.592	0	1.218	0	0
2004	3	16	23	0	0	16.393	0	1.195	0	0
2004	3	17	0	0	0	15.438	0	1.142	0	0
2004	3	17	1	0	0	15.692	0	1.1	0	0
2004	3	17	2	0	0	16.513	0	1.12	0	0
2004	3	17	3	0	0	16.902	0	1.1	0	0
2004	3	17	4	0	0	17.195	0	1.09	0	0
2004	3	17	5	0	0	15.959	0	1.075	0	0
2004	3	17	6	0	0	15.83	0	1.018	0	0
2004	3	17	7	0	0	15.157	0	1.06	0	0
2004	3	17	8	0	0	15.074	0	1.08	0	0
2004	3	17	9	0	0	15.316	0	0.99	0	0
2004	3	17	10	0	0	15.05	0	0.865	0	0
2004	3	17	11	0	0	13.804	0	0.8	0	0
2004	3	17	12	0	0	13.006	0	0.822	0	0
2004	3	17	13	0	0	11.96	0	0.8	0	0
2004	3	17	14	0	0	9.243	0	0.8	0	0
2004	3	17	15	0	0	9.414	0	0.8	0	0
2004	3	17	16	0	0	9.607	0	0.8	0	0
2004	3	17	17	0	0	7.819	0	0.8	0	0
2004	3	17	18	0	0	7.624	0	0.8	0	0
2004	3	17	19	0	0	7.497	0	0.8	0	0
2004	3	17	20	0	0	7.24	0	0.8	0	0
2004	3	17	21	0	0	7.042	0	0.803	0	0
2004	3	17	22	0	0	6.215	0	0.812	0	0
2004	3	17	23	0	0	6.696	0	0.826	0	0
2004	3	18	0	0	0	5.73	0	0.842	0	0
2004	3	18	1	0	0	5.517	0	0.86	0	0
2004	3	18	2	0	0	5.254	0	0.88	0	0
2004	3	18	3	0	0	5.128	0	0.898	0	0
2004	3	18	4	0	0	4.793	0	0.914	0	0
2004	3	18	5	0	0	4.824	0	0.928	0	0
2004	3	18	6	0	0	3.46	0	0.937	0	0
2004	3	18	7	0	0	3.738	0	0.94	0	0
2004	3	18	8	0	0	5.117	0	0.867	0	0
2004	3	18	9	0	0	5.758	0	0.853	0	0
2004	3	18	10	0	0	7.403	0	0.841	0	0
2004	3	18	11	0	0	9.277	0	0.831	0	0
2004	3	18	12	0	0	10.568	0	0.823	0	0
2004	3	18	13	0	0	10.84	0	0.816	0	0
2004	3	18	14	0	0	10.679	0	0.811	0	0
2004	3	18	15	0	0	11.176	0	0.806	0	0
2004	3	18	16	0	0	9.382	0	0.803	0	0
2004	3	18	17	0	0	10.884	0	0.801	0	0
2004	3	18	18	0	0	11.712	0	0.8	0	0
2004	3	18	19	0	0	13.49	0	0.8	0	0
2004	3	18	20	0	0	14.407	0	0.8	0	0
2004	3	18	21	0	0	15.516	0	0.8	0	0
2004	3	18	22	0	0	17.877	0	0.85	0	0
2004	3	18	23	0	0	17.201	0	0.873	0	0
2004	3	19	0	0	0	16.252	0	0.889	0	0
2004	3	19	1	0	0	15.987	0	0.925	0	0
2004	3	19	2	0	0	15.286	0	1.4	0	0
2004	3	19	3	0	0	14.81	0	1.517	0	0
2004	3	19	4	0	0	13.937	0	1.458	0	0
2004	3	19	5	0	0	13.536	0	1.44	0	0
2004	3	19	6	0	0	14.258	0	1.4	0	0
2004	3	19	7	0	0	14.093	0	1.337	0	0
2004	3	19	8	0	0	13.31	0	1.344	0	0
2004	3	19	9	0	0	15.058	0	1.4	0	0
2004	3	19	10	0	0	15.388	0	1.45	0	0
2004	3	19	11	0	0	15.65	0	1.327	0	0
2004	3	19	12	0	0	17.572	0	1.361	0	0
2004	3	19	13	0	0	20.212	0	1.425	0	0
2004	3	19	14	0	0	23.233	0	1.459	0	0
2004	3	19	15	0	0	22.734	0	1.284	0	0
2004	3	19	16	0	0	22.765	0	1.571	0	0
2004	3	19	17	0	0	23.681	0	2.802	0	0
2004	3	19	18	0	0	20.622	0	3.039	0	0
2004	3	19	19	0	0	19.333	0	3.053	0	0
2004	3	19	20	0	0	19.167	0	2.934	0	0
2004	3	19	21	0	0	20.416	0	2.867	0	0
2004	3	19	22	0	0	20.317	0	2.956	0	0
2004	3	19	23	0	0	19.533	0	2.916	0	0
2004	3	20	0	0	0	18.346	0	2.948	0	0
2004	3	20	1	0	0	18.503	0	3.049	0	0
2004	3	20	2	0	0	17.716	0	3.065	0	0
2004	3	20	3	0	0	16.684	0	3.063	0	0
2004	3	20	4	0	0	17.363	0	2.969	0	0
2004	3	20	5	0	0	15.929	0	2.763	0	0
2004	3	20	6	0	0	14.956	0	2.622	0	0
2004	3	20	7	0	0	13.72	0	2.518	0	0
2004	3	20	8	0	0	13.62	0	2.028	0	0
2004	3	20	9	0	0	10.878	0	1.511	0	0
2004	3	20	10	0	0	10.375	0	1.723	0	0
2004	3	20	11	0	0	15.747	0	2.36	0	0
2004	3	20	12	0	0	19.828	0	2.18	0	0
2004	3	20	13	0	0	21.115	0	2	0	0
2004	3	20	14	0	0	22.176	0	2.42	0	0
2004	3	20	15	0	0	22.23	0	2.639	0	0
2004	3	20	16	0	0	25.585	0	2.79	0	0
2004	3	20	17	0	0	27.156	0	2.9	0	0
2004	3	20	18	0	0	28.236	0	2.873	0	0
2004	3	20	19	0	0	26.803	0	3.105	0	0
2004	3	20	20	0	0	23.893	0	3.175	0	0
2004	3	20	21	0	0	24.74	0	3.164	0	0
2004	3	20	22	0	0	26.853	0	3.272	0	0
2004	3	20	23	0	0	26.774	0	3.51	0	0
2004	3	21	0	0	0	26.916	0	3.763	0	0
2004	3	21	1	0	0	27.05	0	3.919	0	0
2004	3	21	2	0	0	25.103	0	3.993	0	0
2004	3	21	3	0	0	24.198	0	4.089	0	0
2004	3	21	4	0	0	23.22	0	4	0	0
2004	3	21	5	0	0	22.796	0	3.876	0	0
2004	3	21	6	0	0	22.22	0	3.815	0	0
2004	3	21	7	0	0	20.655	0	3.639	0	0
2004	3	21	8	0	0	20.6	0	3.64	0	0
2004	3	21	9	0	0	20.716	0	3.355	0	0
2004	3	21	10	0	0	19.207	0	3.2	0	0
2004	3	21	11	0	0	18.367	0	3.015	0	0
2004	3	21	12	0	0	16.914	0	2.9	0	0
2004	3	21	13	0	0	16.683	0	2.75	0	0
2004	3	21	14	0	0	15.617	0	2.43	0	0
2004	3	21	15	0	0	16.678	0	2.495	0	0
2004	3	21	16	0	0	14.992	0	2.485	0	0
2004	3	21	17	0	0	13.346	0	2.42	0	0
2004	3	21	18	0	0	13.158	0	2.325	0	0
2004	3	21	19	0	0	12.762	0	2.242	0	0
2004	3	21	20	0	0	12.836	0	2.226	0	0
2004	3	21	21	0	0	12.716	0	2.174	0	0
2004	3	21	22	0	0	11.528	0	1.95	0	0
2004	3	21	23	0	0	11.276	0	1.888	0	0
2004	3	22	0	0	0	12.568	0	2.03	0	0
2004	3	22	1	0	0	12.065	0	1.767	0	0
2004	3	22	2	0	0	9.643	0	1.453	0	0
2004	3	22	3	0	0	9.61	0	1.444	0	0
2004	3	22	4	0	0	9.032	0	1.495	0	0
2004	3	22	5	0	0	8.586	0	1.5	0	0
2004	3	22	6	0	0	8.434	0	1.489	0	0
2004	3	22	7	0	0	9.092	0	1.565	0	0
2004	3	22	8	0	0	9.244	0	1.611	0	0
2004	3	22	9	0	0	10.986	0	1.584	0	0
2004	3	22	10	0	0	11.74	0	1.555	0	0
2004	3	22	11	0	0	11.681	0	1.584	0	0
2004	3	22	12	0	0	12.262	0	1.537	0	0
2004	3	22	13	0	0	12.028	0	1.511	0	0
2004	3	22	14	0	0	11.21	0	1.43	0	0
2004	3	22	15	0	0	10.644	0	1.4	0	0
2004	3	22	16	0	0	11.132	0	1.458	0	0
2004	3	22	17	0	0	11.13	0	1.55	0	0
2004	3	22	18	0	0	11.692	0	1.716	0	0
2004	3	22	19	0	0	11.715	0	1.735	0	0
2004	3	22	20	0	0	10.944	0	1.76	0	0
2004	3	22	21	0	0	10.642	0	1.794	0	0
2004	3	22	22	0	0	11.398	0	1.724	0	0
2004	3	22	23	0	0	10.113	0	1.605	0	0
2004	3	23	0	0	0	9.79	0	1.644	0	0
2004	3	23	1	0	0	9.447	0	1.6	0	0
2004	3	23	2	0	0	9.486	0	1.6	0	0
2004	3	23	3	0	0	8.936	0	1.544	0	0
2004	3	23	4	0	0	8.675	0	1.415	0	0
2004	3	23	5	0	0	7.917	0	1.32	0	0
2004	3	23	6	0	0	7.912	0	1.3	0	0
2004	3	23	7	0	0	7.588	0	1.3	0	0
2004	3	23	8	0	0	7.347	0	1.279	0	0
2004	3	23	9	0	0	6.672	0	1.22	0	0
2004	3	23	10	0	0	6.107	0	1.179	0	0
2004	3	23	11	0	0	5.924	0	1.055	0	0
2004	3	23	12	0	0	5.552	0	1.119	0	0
2004	3	23	13	0	0	5.66	0	1.06	0	0
2004	3	23	14	0	0	5.601	0	1.156	0	0
2004	3	23	15	0	0	5.202	0	1.205	0	0
2004	3	23	16	0	0	5.017	0	1.263	0	0
2004	3	23	17	0	0	4.57	0	1.232	0	0
2004	3	23	18	0	0	4.072	0	1	0	0
2004	3	23	19	0	0	3.69	0	1	0	0
2004	3	23	20	0	0	4.22	0	1.001	0	0
2004	3	23	21	0	0	3.504	0	1.002	0	0
2004	3	23	22	0	0	3.3	0	1.003	0	0
2004	3	23	23	0	0	4.021	0	1.005	0	0
2004	3	24	0	0	0	3.196	0	1.007	0	0
2004	3	24	1	0	0	3.078	0	1.009	0	0
2004	3	24	2	0	0	4.994	0	1.012	0	0
2004	3	24	3	0	0	4.492	0	1.015	0	0
2004	3	24	4	0	0	4.205	0	1.018	0	0
2004	3	24	5	0	0	5.536	0	1.021	0	0
2004	3	24	6	0	0	5.692	0	1.025	0	0
2004	3	24	7	0	0	5.598	0	1.029	0	0
2004	3	24	8	0	0	6.883	0	1.033	0	0
[truncated: 76,168 more rows]
