# Supplementary material
Source: MDPI journal article supplement (https://www.mdpi.com/1996-1073/10/7/925)
Supplement: s1 [file s1 › S4_Heimdal.txt]

2004	6	21	7	40	0	3.2	0	1.7	0	0
2004	6	21	8	0	0	3	0	1.8	0	0
2004	6	21	8	20	0	3.3	0	1.4	0	0
2004	6	21	8	40	0	3.1	0	1.3	0	0
2004	6	21	9	0	0	3.1	0	1.4	0	0
2004	6	21	9	20	0	3.1	0	1.7	0	0
2004	6	21	9	40	0	3.2	0	1.5	0	0
2004	6	21	10	0	0	3.6	0	1.4	0	0
2004	6	21	10	20	0	3.1	0	1.5	0	0
2004	6	21	10	40	0	2.7	0	1.2	0	0
2004	6	21	11	0	0	3	0	1.6	0	0
2004	6	21	11	20	0	2.8	0	1.3	0	0
2004	6	21	11	40	0	3.9	0	1.6	0	0
2004	6	21	12	0	0	4.1	0	1.6	0	0
2004	6	21	12	20	0	4.2	0	1.3	0	0
2004	6	21	12	40	0	3.8	0	1.3	0	0
2004	6	21	13	0	0	4	0	1.5	0	0
2004	6	21	13	20	0	3.7	0	1.2	0	0
2004	6	21	13	40	0	3.4	0	1.2	0	0
2004	6	21	14	0	0	3.3	0	1.4	0	0
2004	6	21	14	20	0	3.5	0	1.4	0	0
2004	6	21	14	40	0	3.2	0	1.5	0	0
2004	6	21	15	0	0	3.3	0	1.3	0	0
2004	6	21	15	20	0	3.2	0	1.4	0	0
2004	6	21	15	40	0	1.6	0	1.3	0	0
2004	6	21	16	0	0	1.5	0	1.2	0	0
2004	6	21	16	20	0	1.8	0	1.4	0	0
2004	6	21	16	40	0	1.7	0	1.4	0	0
2004	6	21	17	0	0	1.7	0	1.3	0	0
2004	6	21	17	20	0	2.1	0	1.3	0	0
2004	6	21	17	40	0	2.2	0	1.5	0	0
2004	6	21	18	0	0	1	0	1.3	0	0
2004	6	21	18	20	0	1.4	0	1.3	0	0
2004	6	21	18	40	0	1.6	0	1.4	0	0
2004	6	21	19	0	0	1.5	0	1.4	0	0
2004	6	21	19	20	0	1.6	0	1.3	0	0
2004	6	21	19	40	0	1	0	1.5	0	0
2004	6	21	20	0	0	1.1	0	1.4	0	0
2004	6	21	20	20	0	1.1	0	1.3	0	0
2004	6	21	20	40	0	1.3	0	1.5	0	0
2004	6	21	21	0	0	1	0	1.2	0	0
2004	6	21	21	20	0	1.3	0	1.5	0	0
2004	6	21	21	40	0	1.9	0	1.4	0	0
2004	6	21	22	0	0	2.4	0	1.4	0	0
2004	6	21	22	20	0	2.7	0	1.3	0	0
2004	6	21	22	40	0	1.7	0	1.7	0	0
2004	6	21	23	0	0	1.8	0	1.2	0	0
2004	6	21	23	20	0	1.3	0	1.5	0	0
2004	6	21	23	40	0	1.7	0	1.6	0	0
2004	6	22	0	0	0	1	0	1.8	0	0
2004	6	22	0	20	0	0.6	0	1.3	0	0
2004	6	22	0	40	0	0.3	0	1.2	0	0
2004	6	22	1	0	0	0.4	0	1.2	0	0
2004	6	22	1	20	0	0.6	0	1.2	0	0
2004	6	22	1	40	0	0.9	0	1.3	0	0
2004	6	22	2	0	0	1.5	0	1.2	0	0
2004	6	22	2	20	0	1.3	0	1.1	0	0
2004	6	22	2	40	0	1.5	0	1.2	0	0
2004	6	22	3	0	0	1.7	0	1.2	0	0
2004	6	22	3	20	0	2.1	0	1.2	0	0
2004	6	22	3	40	0	1.9	0	1.5	0	0
2004	6	22	4	0	0	1.9	0	1.5	0	0
2004	6	22	4	20	0	1.8	0	1.4	0	0
2004	6	22	4	40	0	1.8	0	1.1	0	0
2004	6	22	5	0	0	1.1	0	1.4	0	0
2004	6	22	5	20	0	0.9	0	1.2	0	0
2004	6	22	5	40	0	0.8	0	1.3	0	0
2004	6	22	6	0	0	1.4	0	1.2667	0	0
2004	6	22	6	20	0	1.7	0	1.2333	0	0
2004	6	22	6	40	0	1.1	0	1.2	0	0
2004	6	22	7	0	0	1.1	0	1.2	0	0
2004	6	22	7	20	0	1.1	0	1.2	0	0
2004	6	22	7	40	0	0.8	0	1.1	0	0
2004	6	22	8	0	0	0.4	0	1.2	0	0
2004	6	22	8	20	0	0.5	0	1.1	0	0
2004	6	22	8	40	0	0.5	0	1	0	0
2004	6	22	9	0	0	0.3	0	1	0	0
2004	6	22	9	20	0	0.9	0	1	0	0
2004	6	22	9	40	0	1.4	0	1.1	0	0
2004	6	22	10	0	0	1.8	0	0.9	0	0
2004	6	22	10	20	0	2	0	1.1	0	0
2004	6	22	10	40	0	2	0	1	0	0
2004	6	22	11	0	0	1.8	0	0.9	0	0
2004	6	22	11	20	0	1.4	0	0.9	0	0
2004	6	22	11	40	0	1.2	0	1.1	0	0
2004	6	22	12	0	0	1	0	1.1	0	0
2004	6	22	12	20	0	1	0	1	0	0
2004	6	22	12	40	0	1.3	0	1	0	0
2004	6	22	13	0	0	1.1	0	1	0	0
2004	6	22	13	20	0	2.6	0	1	0	0
2004	6	22	13	40	0	3.2	0	1	0	0
2004	6	22	14	0	0	3.4	0	1	0	0
2004	6	22	14	20	0	3.6	0	1	0	0
2004	6	22	14	40	0	3.5	0	1.1	0	0
2004	6	22	15	0	0	3.6	0	0.9	0	0
2004	6	22	15	20	0	3.3	0	1	0	0
2004	6	22	15	40	0	4	0	0.9	0	0
2004	6	22	16	0	0	3.7	0	0.9	0	0
2004	6	22	16	20	0	3.6	0	0.8	0	0
2004	6	22	16	40	0	3.2	0	0.9	0	0
2004	6	22	17	0	0	3.2	0	0.9	0	0
2004	6	22	17	20	0	2.8	0	0.8	0	0
2004	6	22	17	40	0	2.6	0	0.8	0	0
2004	6	22	18	0	0	3.1	0	1	0	0
2004	6	22	18	20	0	2.3	0	0.8	0	0
2004	6	22	18	40	0	3.2	0	0.8	0	0
2004	6	22	19	0	0	3	0	0.8	0	0
2004	6	22	19	20	0	4.4	0	0.8	0	0
2004	6	22	19	40	0	4.1	0	0.8	0	0
2004	6	22	20	0	0	3.7	0	0.7	0	0
2004	6	22	20	20	0	3.5	0	0.8	0	0
2004	6	22	20	40	0	3.3	0	0.7	0	0
2004	6	22	21	0	0	3.1	0	0.8	0	0
2004	6	22	21	20	0	2.6	0	0.7	0	0
2004	6	22	21	40	0	2.7	0	0.6	0	0
2004	6	22	22	0	0	2.4	0	0.7	0	0
2004	6	22	22	20	0	2.4	0	0.8	0	0
2004	6	22	22	40	0	2.6	0	0.7	0	0
2004	6	22	23	0	0	2.6	0	0.8	0	0
2004	6	22	23	20	0	2.7	0	0.6	0	0
2004	6	22	23	40	0	3	0	0.7	0	0
2004	6	23	0	0	0	3.1	0	0.7	0	0
2004	6	23	0	20	0	3.6	0	0.7	0	0
2004	6	23	0	40	0	3.9	0	0.6	0	0
2004	6	23	1	0	0	4	0	0.6	0	0
2004	6	23	1	20	0	4.4	0	0.7	0	0
2004	6	23	1	40	0	4.6	0	0.6	0	0
2004	6	23	2	0	0	4.7	0	0.6	0	0
2004	6	23	2	20	0	4.6	0	0.6	0	0
2004	6	23	2	40	0	4.9	0	0.7	0	0
2004	6	23	3	0	0	4.4	0	0.6	0	0
2004	6	23	3	20	0	2.4	0	0.7	0	0
2004	6	23	3	40	0	1.5	0	0.6	0	0
2004	6	23	4	0	0	2.2	0	0.6	0	0
2004	6	23	4	20	0	2.2	0	0.5	0	0
2004	6	23	4	40	0	2.5	0	0.6	0	0
2004	6	23	5	0	0	2.7	0	0.6	0	0
2004	6	23	5	20	0	2.7	0	0.6	0	0
2004	6	23	5	40	0	2.9	0	0.6	0	0
2004	6	23	6	0	0	2.7	0	0.65	0	0
2004	6	23	6	20	0	2.5	0	0.7	0	0
2004	6	23	6	40	0	2.7	0	0.7	0	0
2004	6	23	7	0	0	2.7	0	0.6	0	0
2004	6	23	7	20	0	2.8	0	0.6	0	0
2004	6	23	7	40	0	2.7	0	0.7	0	0
2004	6	23	8	0	0	2.9	0	0.6	0	0
2004	6	23	8	20	0	2.3	0	0.6	0	0
2004	6	23	8	40	0	2.4	0	0.6	0	0
2004	6	23	9	0	0	2.9	0	0.6	0	0
2004	6	23	9	20	0	3	0	0.6	0	0
2004	6	23	9	40	0	3.6	0	0.6	0	0
2004	6	23	10	0	0	4.2	0	0.6	0	0
2004	6	23	10	20	0	4.6	0	0.6	0	0
2004	6	23	10	40	0	6.4	0	0.6	0	0
2004	6	23	11	0	0	6.2	0	0.6	0	0
2004	6	23	11	20	0	6.4	0	0.6	0	0
2004	6	23	11	40	0	5.8	0	0.6	0	0
2004	6	23	12	0	0	5.9	0	0.7	0	0
2004	6	23	12	20	0	5.8	0	0.7	0	0
2004	6	23	12	40	0	6	0	0.7	0	0
2004	6	23	13	0	0	6.3	0	0.8	0	0
2004	6	23	13	20	0	5.7	0	0.8	0	0
2004	6	23	13	40	0	6.3	0	0.8	0	0
2004	6	23	14	0	0	7	0	0.7	0	0
2004	6	23	14	20	0	5.5	0	0.8	0	0
2004	6	23	14	40	0	4.3	0	0.9	0	0
2004	6	23	15	0	0	5.1	0	0.8	0	0
2004	6	23	15	20	0	6	0	0.9	0	0
2004	6	23	15	40	0	6.7	0	0.9	0	0
2004	6	23	16	0	0	7.6	0	0.8	0	0
2004	6	23	16	20	0	7.2	0	0.9	0	0
2004	6	23	16	40	0	7.3	0	0.9	0	0
2004	6	23	17	0	0	7.9	0	1	0	0
2004	6	23	17	20	0	8.1	0	0.9	0	0
2004	6	23	17	40	0	8.2	0	1	0	0
2004	6	23	18	0	0	8.9	0	1.1	0	0
2004	6	23	18	20	0	9.9	0	1	0	0
2004	6	23	18	40	0	9.2	0	1.2	0	0
2004	6	23	19	0	0	8.9	0	1.2	0	0
2004	6	23	19	20	0	8	0	1.2	0	0
2004	6	23	19	40	0	8.6	0	1.4	0	0
2004	6	23	20	0	0	8.2	0	1.5	0	0
2004	6	23	20	20	0	8.7	0	1.4	0	0
2004	6	23	20	40	0	6.4	0	1.5	0	0
2004	6	23	21	0	0	5.6	0	1.6	0	0
2004	6	23	21	20	0	6.9	0	1.4	0	0
2004	6	23	21	40	0	6.7	0	1.5	0	0
2004	6	23	22	0	0	6.7	0	1.5	0	0
2004	6	23	22	20	0	5.7	0	1.4	0	0
2004	6	23	22	40	0	5	0	1.4	0	0
2004	6	23	23	0	0	5.6	0	1.4	0	0
2004	6	23	23	20	0	6	0	1.5	0	0
2004	6	23	23	40	0	6.2	0	1.6	0	0
2004	6	24	0	0	0	6.3	0	1.4	0	0
2004	6	24	0	20	0	6	0	1.6	0	0
2004	6	24	0	40	0	7.1	0	1.6	0	0
2004	6	24	1	0	0	6.2	0	1.5	0	0
2004	6	24	1	20	0	6.2	0	1.5	0	0
2004	6	24	1	40	0	5.3	0	1.6	0	0
2004	6	24	2	0	0	5.7	0	1.7	0	0
2004	6	24	2	20	0	7.7	0	1.6	0	0
2004	6	24	2	40	0	5.1	0	1.6	0	0
2004	6	24	3	0	0	4.7	0	1.6	0	0
2004	6	24	3	20	0	5.1	0	1.7	0	0
2004	6	24	3	40	0	6.5	0	1.8	0	0
2004	6	24	4	0	0	6	0	1.5	0	0
2004	6	24	4	20	0	5.8	0	1.7	0	0
2004	6	24	4	40	0	6.7	0	1.8	0	0
2004	6	24	5	0	0	6.2	0	1.6	0	0
2004	6	24	5	20	0	6.1	0	1.8	0	0
2004	6	24	5	40	0	6.9	0	1.7	0	0
2004	6	24	6	0	0	7	0	1.8	0	0
2004	6	24	6	20	0	7.4	0	1.6	0	0
2004	6	24	6	40	0	7	0	1.8	0	0
2004	6	24	7	0	0	6.5	0	1.5	0	0
2004	6	24	7	20	0	5.6	0	1.5	0	0
2004	6	24	7	40	0	5	0	1.6	0	0
2004	6	24	8	0	0	4.8	0	1.7	0	0
2004	6	24	8	20	0	4.4	0	1.4	0	0
2004	6	24	8	40	0	3.9	0	1.6	0	0
2004	6	24	9	0	0	3.5	0	1.6	0	0
2004	6	24	9	20	0	2.4	0	1.6	0	0
2004	6	24	9	40	0	2.5	0	1.6	0	0
2004	6	24	10	0	0	3.1	0	1.6	0	0
2004	6	24	10	20	0	3	0	1.6	0	0
2004	6	24	10	40	0	3.9	0	1.5	0	0
2004	6	24	11	0	0	3.7	0	1.4	0	0
2004	6	24	11	20	0	3.4	0	1.5	0	0
2004	6	24	11	40	0	5.3	0	1.5	0	0
2004	6	24	12	0	0	4.2	0	1.2	0	0
2004	6	24	12	20	0	4.2	0	1.5	0	0
2004	6	24	12	40	0	4	0	1.3	0	0
2004	6	24	13	0	0	4.9	0	1.3	0	0
2004	6	24	13	20	0	6.3	0	1.4	0	0
2004	6	24	13	40	0	5.3	0	1.2	0	0
2004	6	24	14	0	0	5.7	0	1.2	0	0
2004	6	24	14	20	0	6.5	0	1.3	0	0
2004	6	24	14	40	0	6.9	0	1.1	0	0
2004	6	24	15	0	0	6.4	0	1.3	0	0
2004	6	24	15	20	0	6.4	0	1.5	0	0
2004	6	24	15	40	0	6.4	0	1.3	0	0
2004	6	24	16	0	0	6.3	0	1.3	0	0
2004	6	24	16	20	0	6.8	0	1.3	0	0
2004	6	24	16	40	0	6.9	0	1.3	0	0
2004	6	24	17	0	0	6.5	0	1.5	0	0
2004	6	24	17	20	0	6.4	0	1.5	0	0
2004	6	24	17	40	0	6.3	0	1.7	0	0
2004	6	24	18	0	0	6.9	0	1.5	0	0
2004	6	24	18	20	0	6.7	0	1.6	0	0
2004	6	24	18	40	0	7.1	0	1.7	0	0
2004	6	24	19	0	0	7	0	1.7	0	0
2004	6	24	19	20	0	6.9	0	1.6	0	0
2004	6	24	19	40	0	7.2	0	1.7	0	0
2004	6	24	20	0	0	7.5	0	1.6	0	0
2004	6	24	20	20	0	8	0	1.6	0	0
2004	6	24	20	40	0	7.7	0	1.7	0	0
2004	6	24	21	0	0	8.7	0	1.6	0	0
2004	6	24	21	20	0	7.4	0	1.8	0	0
2004	6	24	21	40	0	8.8	0	1.7	0	0
2004	6	24	22	0	0	8.5	0	1.6	0	0
2004	6	24	22	20	0	7.8	0	1.9	0	0
2004	6	24	22	40	0	7.3	0	1.8	0	0
2004	6	24	23	0	0	8.3	0	1.7	0	0
2004	6	24	23	20	0	9	0	1.6	0	0
2004	6	24	23	40	0	9.3	0	1.7	0	0
2004	6	25	0	0	0	9	0	1.8	0	0
2004	6	25	0	20	0	9.3	0	1.9	0	0
2004	6	25	0	40	0	10	0	1.7	0	0
2004	6	25	1	0	0	9.7	0	1.6	0	0
2004	6	25	1	20	0	10	0	1.8	0	0
2004	6	25	1	40	0	11	0	1.8	0	0
2004	6	25	2	0	0	10.3	0	1.8	0	0
2004	6	25	2	20	0	10.5	0	1.9	0	0
2004	6	25	2	40	0	10.1	0	2	0	0
2004	6	25	3	0	0	9.7	0	1.8	0	0
2004	6	25	3	20	0	10.3	0	1.9	0	0
2004	6	25	3	40	0	10.1	0	1.9	0	0
2004	6	25	4	0	0	9.8	0	1.9	0	0
2004	6	25	4	20	0	10.6	0	1.8	0	0
2004	6	25	4	40	0	9.9	0	2	0	0
2004	6	25	5	0	0	9.9	0	1.9	0	0
2004	6	25	5	20	0	10.8	0	1.8	0	0
2004	6	25	5	40	0	10.6	0	1.7	0	0
2004	6	25	6	0	0	10.9	0	2	0	0
2004	6	25	6	20	0	11	0	2	0	0
2004	6	25	6	40	0	10.8	0	2	0	0
2004	6	25	7	0	0	10.9	0	2	0	0
2004	6	25	7	20	0	10.7	0	2.3	0	0
2004	6	25	7	40	0	10.9	0	2.1	0	0
2004	6	25	8	0	0	11.5	0	2.1	0	0
2004	6	25	8	20	0	11.4	0	2.1	0	0
2004	6	25	8	40	0	11	0	2.2	0	0
2004	6	25	9	0	0	11.8	0	2.2	0	0
2004	6	25	9	20	0	11.7	0	2.4	0	0
2004	6	25	9	40	0	11.6	0	2.4	0	0
2004	6	25	10	0	0	11.5	0	2.5	0	0
2004	6	25	10	20	0	12.9	0	2.4	0	0
2004	6	25	10	40	0	11.6	0	2.4	0	0
2004	6	25	11	0	0	12	0	2.5	0	0
2004	6	25	11	20	0	12.6	0	2.6	0	0
2004	6	25	11	40	0	12.5	0	2.8	0	0
2004	6	25	12	0	0	12.5	0	3	0	0
2004	6	25	12	20	0	12.2	0	2.5	0	0
2004	6	25	12	40	0	12	0	3.1	0	0
2004	6	25	13	0	0	12.6	0	2.7	0	0
2004	6	25	13	20	0	12.1	0	2.7	0	0
2004	6	25	13	40	0	12.6	0	2.8	0	0
2004	6	25	14	0	0	12.9	0	2.8	0	0
2004	6	25	14	20	0	13.4	0	3.1	0	0
2004	6	25	14	40	0	12.7	0	3.2	0	0
2004	6	25	15	0	0	13.1	0	3	0	0
2004	6	25	15	20	0	12.2	0	2.8	0	0
2004	6	25	15	40	0	11.6	0	2.5	0	0
2004	6	25	16	0	0	12.2	0	3.3	0	0
2004	6	25	16	20	0	11.4	0	3	0	0
2004	6	25	16	40	0	12.7	0	2.7	0	0
2004	6	25	17	0	0	11.9	0	2.8	0	0
2004	6	25	17	20	0	11.8	0	2.9	0	0
2004	6	25	17	40	0	12.3	0	2.8	0	0
2004	6	25	18	0	0	12.2	0	2.8	0	0
2004	6	25	18	20	0	11.8	0	3.2	0	0
2004	6	25	18	40	0	11.6	0	2.9	0	0
2004	6	25	19	0	0	11.7	0	2.9	0	0
2004	6	25	19	20	0	11.5	0	2.7	0	0
2004	6	25	19	40	0	11.1	0	3	0	0
2004	6	25	20	0	0	11.9	0	2.7	0	0
2004	6	25	20	20	0	10.6	0	2.7	0	0
2004	6	25	20	40	0	10.7	0	2.6	0	0
2004	6	25	21	0	0	11.2	0	3	0	0
2004	6	25	21	20	0	10.9	0	3	0	0
2004	6	25	21	40	0	10.6	0	2.5	0	0
2004	6	25	22	0	0	10.4	0	2.6	0	0
2004	6	25	22	20	0	10.6	0	2.5	0	0
2004	6	25	22	40	0	9.3	0	2.5	0	0
2004	6	25	23	0	0	9.6	0	2.3	0	0
2004	6	25	23	20	0	9.9	0	2.3	0	0
2004	6	25	23	40	0	9.6	0	2.4	0	0
2004	6	26	0	0	0	9	0	2.7	0	0
2004	6	26	0	20	0	8.3	0	2.5	0	0
2004	6	26	0	40	0	8.6	0	2.6	0	0
2004	6	26	1	0	0	7.8	0	2.3	0	0
2004	6	26	1	20	0	8.4	0	2.25	0	0
2004	6	26	1	40	0	8.2	0	2.2	0	0
2004	6	26	2	0	0	7.8	0	2	0	0
2004	6	26	2	20	0	8	0	2.2	0	0
2004	6	26	2	40	0	7.5	0	2.4	0	0
2004	6	26	3	0	0	7.6	0	2.1	0	0
2004	6	26	3	20	0	7.8	0	1.9	0	0
2004	6	26	3	40	0	7.1	0	1.8	0	0
2004	6	26	4	0	0	6.7	0	2.1	0	0
2004	6	26	4	20	0	7.1	0	2	0	0
2004	6	26	4	40	0	5.5	0	1.9	0	0
2004	6	26	5	0	0	6.5	0	1.8	0	0
2004	6	26	5	20	0	6.1	0	1.6	0	0
2004	6	26	5	40	0	5.5	0	1.7	0	0
2004	6	26	6	0	0	4.8	0	1.8	0	0
2004	6	26	6	20	0	5.4	0	1.7	0	0
2004	6	26	6	40	0	5.6	0	1.7	0	0
2004	6	26	7	0	0	5.9	0	1.8	0	0
2004	6	26	7	20	0	5.4	0	1.5	0	0
2004	6	26	7	40	0	5.3	0	1.4	0	0
2004	6	26	8	0	0	4.5	0	1.4	0	0
2004	6	26	8	20	0	4.4	0	1.5	0	0
2004	6	26	8	40	0	4.7	0	1.6	0	0
2004	6	26	9	0	0	4.5	0	1.6	0	0
2004	6	26	9	20	0	2.4	0	1.4	0	0
2004	6	26	9	40	0	3.1	0	1.5	0	0
2004	6	26	10	0	0	2	0	1.2	0	0
2004	6	26	10	20	0	2.3	0	1.3	0	0
2004	6	26	10	40	0	2.2	0	1.1	0	0
2004	6	26	11	0	0	2.7	0	1.2	0	0
2004	6	26	11	20	0	3.1	0	1.3	0	0
2004	6	26	11	40	0	4.2	0	1.2	0	0
2004	6	26	12	0	0	3.5	0	1.2	0	0
2004	6	26	12	20	0	2.8	0	1	0	0
2004	6	26	12	40	0	3.3	0	0.95	0	0
2004	6	26	13	0	0	3.1	0	0.9	0	0
2004	6	26	13	20	0	5.3	0	0.8	0	0
2004	6	26	13	40	0	5	0	1	0	0
2004	6	26	14	0	0	4.6	0	0.9	0	0
2004	6	26	14	20	0	2.1	0	1	0	0
2004	6	26	14	40	0	2.8	0	1.2	0	0
2004	6	26	15	0	0	2.2	0	1.1	0	0
2004	6	26	15	20	0	1.8	0	1.4	0	0
2004	6	26	15	40	0	1.6	0	1.2	0	0
2004	6	26	16	0	0	1.4	0	1.2	0	0
2004	6	26	16	20	0	1.4	0	1.2	0	0
2004	6	26	16	40	0	1.5	0	1.3	0	0
2004	6	26	17	0	0	1.4	0	1.2	0	0
2004	6	26	17	20	0	2.1	0	1.1	0	0
2004	6	26	17	40	0	3	0	1.1	0	0
2004	6	26	18	0	0	3	0	1	0	0
2004	6	26	18	20	0	2	0	1	0	0
2004	6	26	18	40	0	1.8	0	1.1	0	0
2004	6	26	19	0	0	1.5	0	1	0	0
2004	6	26	19	20	0	1.5	0	1.1	0	0
2004	6	26	19	40	0	1.8	0	1.1	0	0
2004	6	26	20	0	0	1	0	1	0	0
2004	6	26	20	20	0	1.2	0	1.1	0	0
2004	6	26	20	40	0	1.4	0	1	0	0
2004	6	26	21	0	0	1.4	0	1.1	0	0
2004	6	26	21	20	0	1.5	0	1	0	0
2004	6	26	21	40	0	1.2	0	1.1	0	0
2004	6	26	22	0	0	1.3	0	1	0	0
2004	6	26	22	20	0	1.3	0	1.05	0	0
2004	6	26	22	40	0	0.8	0	1.1	0	0
2004	6	26	23	0	0	1.3	0	1	0	0
2004	6	26	23	20	0	1.3	0	1.05	0	0
2004	6	26	23	40	0	1.4	0	1.1	0	0
2004	6	27	0	0	0	1.9	0	1.1	0	0
2004	6	27	0	20	0	0.9	0	1.1	0	0
2004	6	27	0	40	0	0.8	0	1	0	0
2004	6	27	1	0	0	1.4	0	1	0	0
2004	6	27	1	20	0	1.5	0	1.3	0	0
2004	6	27	1	40	0	1.1	0	1.1	0	0
2004	6	27	2	0	0	1	0	0.9	0	0
2004	6	27	2	20	0	1.3	0	1.1	0	0
2004	6	27	2	40	0	1.9	0	1.1	0	0
2004	6	27	3	0	0	2.4	0	1.1	0	0
2004	6	27	3	20	0	3	0	1	0	0
2004	6	27	3	40	0	3	0	1.3	0	0
2004	6	27	4	0	0	2.9	0	1.2	0	0
2004	6	27	4	20	0	2.9	0	1	0	0
2004	6	27	4	40	0	3	0	1.1	0	0
2004	6	27	5	0	0	2.9	0	1.2	0	0
2004	6	27	5	20	0	3	0	1.3	0	0
2004	6	27	5	40	0	3.8	0	1.1	0	0
2004	6	27	6	0	0	3.4	0	1.1	0	0
2004	6	27	6	20	0	3	0	1.3	0	0
2004	6	27	6	40	0	3.2	0	1.1	0	0
2004	6	27	7	0	0	2.8	0	1.1	0	0
2004	6	27	7	20	0	3.5	0	1.2	0	0
2004	6	27	7	40	0	5.6	0	1.1	0	0
2004	6	27	8	0	0	5.4	0	1.1	0	0
2004	6	27	8	20	0	5.7	0	1	0	0
2004	6	27	8	40	0	6.6	0	1.2	0	0
2004	6	27	9	0	0	7.1	0	1.2	0	0
2004	6	27	9	20	0	7.1	0	1	0	0
2004	6	27	9	40	0	5.5	0	1.1	0	0
2004	6	27	10	0	0	6.2	0	1.1	0	0
2004	6	27	10	20	0	7.5	0	1.1	0	0
2004	6	27	10	40	0	7.6	0	1.1	0	0
2004	6	27	11	0	0	7.3	0	1.1	0	0
2004	6	27	11	20	0	7.7	0	1	0	0
2004	6	27	11	40	0	7.7	0	1.1	0	0
2004	6	27	12	0	0	7.5	0	1.1	0	0
2004	6	27	12	20	0	7.2	0	1.1	0	0
2004	6	27	12	40	0	7.3	0	1.1	0	0
2004	6	27	13	0	0	6.8	0	1.1	0	0
2004	6	27	13	20	0	6.3	0	1.1	0	0
2004	6	27	13	40	0	8	0	1.2	0	0
2004	6	27	14	0	0	7	0	1.2	0	0
2004	6	27	14	20	0	7.3	0	1.1	0	0
2004	6	27	14	40	0	7.5	0	1.2	0	0
2004	6	27	15	0	0	7.4	0	1.2	0	0
2004	6	27	15	20	0	7.7	0	1.2	0	0
2004	6	27	15	40	0	8.2	0	1.2	0	0
2004	6	27	16	0	0	8.1	0	1.1	0	0
2004	6	27	16	20	0	7.3	0	1.3	0	0
2004	6	27	16	40	0	3.6	0	1.2	0	0
2004	6	27	17	0	0	3.9	0	1.3	0	0
2004	6	27	17	20	0	3.2	0	1.3	0	0
2004	6	27	17	40	0	2.2	0	1.5	0	0
2004	6	27	18	0	0	2.4	0	1.4	0	0
2004	6	27	18	20	0	2.7	0	1.3	0	0
2004	6	27	18	40	0	1.5	0	1.3	0	0
2004	6	27	19	0	0	1.8	0	1.3	0	0
2004	6	27	19	20	0	1.5	0	1.2	0	0
2004	6	27	19	40	0	2.2	0	1.3	0	0
2004	6	27	20	0	0	3.2	0	1.3	0	0
2004	6	27	20	20	0	2	0	1.2	0	0
2004	6	27	20	40	0	1.9	0	1.2	0	0
2004	6	27	21	0	0	1.3	0	1.3	0	0
2004	6	27	21	20	0	1.9	0	1.4	0	0
2004	6	27	21	40	0	4.1	0	1.2	0	0
2004	6	27	22	0	0	1.5	0	1.2	0	0
2004	6	27	22	20	0	1.3	0	1.2	0	0
2004	6	27	22	40	0	1.6	0	1.2	0	0
2004	6	27	23	0	0	2	0	1.3	0	0
2004	6	27	23	20	0	1.7	0	1.2	0	0
2004	6	27	23	40	0	2	0	1.2	0	0
2004	6	28	0	0	0	3.6	0	1.1	0	0
2004	6	28	0	20	0	5.7	0	1	0	0
2004	6	28	0	40	0	6.2	0	1.1	0	0
2004	6	28	1	0	0	2.5	0	1	0	0
2004	6	28	1	20	0	2.7	0	1	0	0
2004	6	28	1	40	0	4	0	1	0	0
2004	6	28	2	0	0	3	0	0.95	0	0
2004	6	28	2	20	0	2	0	0.9	0	0
2004	6	28	2	40	0	4.6	0	0.9	0	0
2004	6	28	3	0	0	5.1	0	0.9	0	0
2004	6	28	3	20	0	4.8	0	0.8	0	0
2004	6	28	3	40	0	5.2	0	0.9	0	0
2004	6	28	4	0	0	4.3	0	0.9	0	0
2004	6	28	4	20	0	4.1	0	0.8	0	0
2004	6	28	4	40	0	3.8	0	0.9	0	0
2004	6	28	5	0	0	3.9	0	0.9	0	0
2004	6	28	5	20	0	3.9	0	0.9	0	0
2004	6	28	5	40	0	4.5	0	0.9	0	0
2004	6	28	6	0	0	3.4	0	0.8	0	0
2004	6	28	6	20	0	1.4	0	0.8	0	0
2004	6	28	6	40	0	1.1	0	0.9	0	0
2004	6	28	7	0	0	0.7	0	0.9	0	0
2004	6	28	7	20	0	0.6	0	0.9	0	0
2004	6	28	7	40	0	0.9	0	0.8	0	0
2004	6	28	8	0	0	2	0	0.9	0	0
2004	6	28	8	20	0	1.5	0	0.9	0	0
2004	6	28	8	40	0	1.1	0	0.8	0	0
2004	6	28	9	0	0	0.7	0	1	0	0
2004	6	28	9	20	0	0.4	0	0.9	0	0
2004	6	28	9	40	0	0.4	0	0.8	0	0
2004	6	28	10	0	0	0.9	0	0.8	0	0
2004	6	28	10	20	0	0.5	0	0.8	0	0
2004	6	28	10	40	0	0.5	0	0.9	0	0
2004	6	28	11	0	0	1.1	0	0.9	0	0
2004	6	28	11	20	0	1.1	0	0.8	0	0
2004	6	28	11	40	0	1.7	0	0.8	0	0
2004	6	28	12	0	0	2	0	0.7	0	0
2004	6	28	12	20	0	1.9	0	0.6	0	0
2004	6	28	12	40	0	2	0	0.7	0	0
2004	6	28	13	0	0	2.5	0	0.6	0	0
2004	6	28	13	20	0	3.4	0	0.7	0	0
2004	6	28	13	40	0	4.8	0	0.6	0	0
2004	6	28	14	0	0	5.1	0	0.6	0	0
2004	6	28	14	20	0	5.3	0	0.6	0	0
2004	6	28	14	40	0	5	0	0.6	0	0
2004	6	28	15	0	0	5.5	0	0.7	0	0
2004	6	28	15	20	0	5.2	0	0.6	0	0
2004	6	28	15	40	0	4.9	0	0.6	0	0
2004	6	28	16	0	0	5.1	0	0.7	0	0
2004	6	28	16	20	0	6.1	0	0.5	0	0
2004	6	28	16	40	0	7.2	0	0.6	0	0
2004	6	28	17	0	0	7.6	0	0.7	0	0
2004	6	28	17	20	0	7.5	0	0.7	0	0
2004	6	28	17	40	0	7.3	0	0.8	0	0
2004	6	28	18	0	0	7.6	0	1.1	0	0
2004	6	28	18	20	0	7.2	0	1.1	0	0
2004	6	28	18	40	0	7.3	0	1.2	0	0
2004	6	28	19	0	0	7.3	0	1.1	0	0
2004	6	28	19	20	0	7.3	0	1.1	0	0
2004	6	28	19	40	0	6.8	0	1.2	0	0
2004	6	28	20	0	0	6.8	0	1.3	0	0
2004	6	28	20	20	0	6.6	0	1.2	0	0
2004	6	28	20	40	0	7	0	1.3	0	0
2004	6	28	21	0	0	7.2	0	1.3	0	0
2004	6	28	21	20	0	7.1	0	1.5	0	0
2004	6	28	21	40	0	7.7	0	1.1	0	0
2004	6	28	22	0	0	7.7	0	1.2	0	0
2004	6	28	22	20	0	7.8	0	1.2	0	0
2004	6	28	22	40	0	7.8	0	1.1	0	0
2004	6	28	23	0	0	7.9	0	1.1	0	0
2004	6	28	23	20	0	7.6	0	1.1	0	0
2004	6	28	23	40	0	7.3	0	1.2	0	0
2004	6	29	0	0	0	7.2	0	1.1	0	0
2004	6	29	0	20	0	6.6	0	1.1	0	0
2004	6	29	0	40	0	7	0	1	0	0
2004	6	29	1	0	0	5.6	0	0.95	0	0
2004	6	29	1	20	0	4.4	0	0.9	0	0
2004	6	29	1	40	0	5.5	0	1	0	0
2004	6	29	2	0	0	5.9	0	0.9	0	0
2004	6	29	2	20	0	6.1	0	1	0	0
2004	6	29	2	40	0	5.1	0	0.9	0	0
2004	6	29	3	0	0	5	0	0.9	0	0
2004	6	29	3	20	0	4.8	0	0.9	0	0
2004	6	29	3	40	0	4.2	0	0.9	0	0
2004	6	29	4	0	0	4.2	0	0.9	0	0
2004	6	29	4	20	0	4.7	0	0.9	0	0
2004	6	29	4	40	0	5.1	0	0.8	0	0
2004	6	29	5	0	0	5.2	0	1	0	0
2004	6	29	5	20	0	5.4	0	0.9	0	0
2004	6	29	5	40	0	5	0	0.9	0	0
2004	6	29	6	0	0	4.9	0	0.9	0	0
2004	6	29	6	20	0	4.8	0	0.9	0	0
2004	6	29	6	40	0	4.7	0	0.9	0	0
2004	6	29	7	0	0	4.6	0	0.9	0	0
2004	6	29	7	20	0	4.8	0	0.9	0	0
2004	6	29	7	40	0	4.5	0	0.9	0	0
2004	6	29	8	0	0	4.4	0	0.9	0	0
2004	6	29	8	20	0	4.5	0	1	0	0
2004	6	29	8	40	0	3.8	0	1	0	0
2004	6	29	9	0	0	3.9	0	1	0	0
2004	6	29	9	20	0	5	0	1	0	0
2004	6	29	9	40	0	5.3	0	0.9	0	0
2004	6	29	10	0	0	6.4	0	0.9	0	0
2004	6	29	10	20	0	7.1	0	0.9	0	0
2004	6	29	10	40	0	8.3	0	1	0	0
2004	6	29	11	0	0	7.8	0	1	0	0
2004	6	29	11	20	0	7.7	0	1	0	0
2004	6	29	11	40	0	7.2	0	1	0	0
2004	6	29	12	0	0	6.9	0	1	0	0
2004	6	29	12	20	0	6.6	0	0.9	0	0
2004	6	29	12	40	0	3.7	0	0.9	0	0
2004	6	29	13	0	0	3.1	0	1	0	0
2004	6	29	13	20	0	2.4	0	0.9	0	0
2004	6	29	13	40	0	2.5	0	0.9	0	0
2004	6	29	14	0	0	2.5	0	1	0	0
2004	6	29	14	20	0	2.1	0	1	0	0
2004	6	29	14	40	0	2.4	0	0.9	0	0
2004	6	29	15	0	0	1.8	0	0.9	0	0
2004	6	29	15	20	0	1.9	0	0.9	0	0
2004	6	29	15	40	0	2	0	0.9	0	0
2004	6	29	16	0	0	1.7	0	0.9	0	0
2004	6	29	16	20	0	1.5	0	0.9	0	0
2004	6	29	16	40	0	1.5	0	0.9	0	0
2004	6	29	17	0	0	1.3	0	0.9	0	0
2004	6	29	17	20	0	1.2	0	0.9	0	0
2004	6	29	17	40	0	1.2	0	0.8	0	0
2004	6	29	18	0	0	1.2	0	0.9	0	0
2004	6	29	18	20	0	0.9	0	0.9	0	0
2004	6	29	18	40	0	0.7	0	0.9	0	0
2004	6	29	19	0	0	0.9	0	0.8	0	0
2004	6	29	19	20	0	0.5	0	0.9	0	0
2004	6	29	19	40	0	0.4	0	1	0	0
2004	6	29	20	0	0	0.7	0	1.1	0	0
2004	6	29	20	20	0	0.9	0	0.9	0	0
2004	6	29	20	40	0	0.5	0	1	0	0
2004	6	29	21	0	0	0.5	0	1	0	0
2004	6	29	21	20	0	0.8	0	1	0	0
2004	6	29	21	40	0	0.8	0	1	0	0
2004	6	29	22	0	0	0.3	0	1	0	0
2004	6	29	22	20	0	0.8	0	1	0	0
2004	6	29	22	40	0	0.9	0	1	0	0
2004	6	29	23	0	0	0.5	0	1	0	0
2004	6	29	23	20	0	0.6	0	1	0	0
2004	6	29	23	40	0	2.5	0	1.1	0	0
2004	6	30	0	0	0	2.8	0	0.9	0	0
2004	6	30	0	20	0	3.2	0	1.1	0	0
2004	6	30	0	40	0	3.5	0	0.9	0	0
2004	6	30	1	0	0	3.8	0	0.9	0	0
2004	6	30	1	20	0	4.3	0	0.9	0	0
2004	6	30	1	40	0	3.4	0	1	0	0
2004	6	30	2	0	0	4.3	0	0.9	0	0
2004	6	30	2	20	0	4.8	0	0.9	0	0
2004	6	30	2	40	0	2.4	0	0.9	0	0
2004	6	30	3	0	0	2.2	0	1	0	0
2004	6	30	3	20	0	2.3	0	0.9	0	0
2004	6	30	3	40	0	2.1	0	1.1	0	0
2004	6	30	4	0	0	1.6	0	1	0	0
2004	6	30	4	20	0	1.2	0	1	0	0
2004	6	30	4	40	0	1.6	0	1.2	0	0
2004	6	30	5	0	0	1.3	0	0.9	0	0
2004	6	30	5	20	0	1.2	0	0.9	0	0
2004	6	30	5	40	0	1.2	0	1.1	0	0
2004	6	30	6	0	0	1.3	0	1	0	0
2004	6	30	6	20	0	1.1	0	1.1	0	0
2004	6	30	6	40	0	1.2	0	1.1	0	0
2004	6	30	7	0	0	1.4	0	1	0	0
2004	6	30	7	20	0	3.2	0	1	0	0
2004	6	30	7	40	0	5.4	0	1	0	0
2004	6	30	8	0	0	5.8	0	1.1	0	0
2004	6	30	8	20	0	8.1	0	1.1	0	0
2004	6	30	8	40	0	9.1	0	1.2	0	0
2004	6	30	9	0	0	8.7	0	1.2	0	0
2004	6	30	9	20	0	8.8	0	1.3	0	0
2004	6	30	9	40	0	8.5	0	1.2	0	0
2004	6	30	10	0	0	9.3	0	1.3	0	0
2004	6	30	10	20	0	8.1	0	1.3	0	0
2004	6	30	10	40	0	9.2	0	1.4	0	0
2004	6	30	11	0	0	9.5	0	1.4	0	0
2004	6	30	11	20	0	8.2	0	1.4	0	0
2004	6	30	11	40	0	9.6	0	1.4	0	0
2004	6	30	12	0	0	9	0	1.4	0	0
2004	6	30	12	20	0	7.3	0	1.3	0	0
2004	6	30	12	40	0	6.2	0	1.4	0	0
2004	6	30	13	0	0	6.5	0	1.4	0	0
2004	6	30	13	20	0	7.2	0	1.3	0	0
2004	6	30	13	40	0	6.8	0	1.2	0	0
2004	6	30	14	0	0	8	0	1.3	0	0
2004	6	30	14	20	0	9	0	1.3	0	0
2004	6	30	14	40	0	8.6	0	1.4	0	0
2004	6	30	15	0	0	7.8	0	1.3	0	0
2004	6	30	15	20	0	4.2	0	1.3	0	0
2004	6	30	15	40	0	8.7	0	1.4	0	0
2004	6	30	16	0	0	8.5	0	1.4	0	0
2004	6	30	16	20	0	8.3	0	1.4	0	0
2004	6	30	16	40	0	7.4	0	1.3	0	0
2004	6	30	17	0	0	4.9	0	1.3	0	0
2004	6	30	17	20	0	4.3	0	1.2	0	0
2004	6	30	17	40	0	6.4	0	1.2	0	0
2004	6	30	18	0	0	5.8	0	1.3	0	0
2004	6	30	18	20	0	6.6	0	1.3	0	0
2004	6	30	18	40	0	4.9	0	1	0	0
2004	6	30	19	0	0	8.1	0	1.2	0	0
2004	6	30	19	20	0	7.4	0	1.1	0	0
2004	6	30	19	40	0	7.4	0	1.1	0	0
2004	6	30	20	0	0	7.5	0	1.1	0	0
2004	6	30	20	20	0	6.8	0	1.2	0	0
2004	6	30	20	40	0	4	0	1.2	0	0
2004	6	30	21	0	0	2.3	0	1.2	0	0
2004	6	30	21	20	0	1.7	0	1.1	0	0
2004	6	30	21	40	0	2	0	1.2	0	0
2004	6	30	22	0	0	2.9	0	1.2	0	0
2004	6	30	22	20	0	4.6	0	1.3	0	0
2004	6	30	22	40	0	5.9	0	1.2	0	0
2004	6	30	23	0	0	6.1	0	1.3	0	0
2004	6	30	23	20	0	5.8	0	1.3	0	0
2004	6	30	23	40	0	5.4	0	1.2	0	0
2004	7	1	0	0	0	5.4	0	1.2	0	0
2004	7	1	0	20	0	5.1	0	1.2	0	0
2004	7	1	0	40	0	3.9	0	1.1	0	0
2004	7	1	1	0	0	4.2	0	1.3	0	0
2004	7	1	1	20	0	5.3	0	1.1	0	0
2004	7	1	1	40	0	5.4	0	1.1	0	0
2004	7	1	2	0	0	5.7	0	1.1	0	0
2004	7	1	2	20	0	5.8	0	1.2	0	0
2004	7	1	2	40	0	5.8	0	1	0	0
2004	7	1	3	0	0	6.1	0	1	0	0
2004	7	1	3	20	0	6	0	1	0	0
2004	7	1	3	40	0	6.1	0	1.2	0	0
2004	7	1	4	0	0	5.9	0	1.1	0	0
2004	7	1	4	20	0	5.3	0	1.2	0	0
2004	7	1	4	40	0	5.8	0	1	0	0
2004	7	1	5	0	0	3.2	0	1.1	0	0
2004	7	1	5	20	0	2.1	0	1.2	0	0
2004	7	1	5	40	0	2.2	0	1.4	0	0
2004	7	1	6	0	0	2.5	0	1.2	0	0
2004	7	1	6	20	0	2.9	0	1.1	0	0
2004	7	1	6	40	0	2.9	0	1.2	0	0
2004	7	1	7	0	0	3.1	0	1.3	0	0
2004	7	1	7	20	0	3	0	1.2	0	0
2004	7	1	7	40	0	2.4	0	1.2	0	0
2004	7	1	8	0	0	3.6	0	1.3	0	0
2004	7	1	8	20	0	4.4	0	1.4	0	0
2004	7	1	8	40	0	4.5	0	1.4	0	0
2004	7	1	9	0	0	4.3	0	1.2	0	0
2004	7	1	9	20	0	3.1	0	1.3	0	0
2004	7	1	9	40	0	2	0	1.2	0	0
2004	7	1	10	0	0	3.7	0	1.2	0	0
2004	7	1	10	20	0	3.1	0	1.4	0	0
2004	7	1	10	40	0	2.5	0	1.1	0	0
2004	7	1	11	0	0	1.7	0	1.1	0	0
2004	7	1	11	20	0	2.5	0	1.2	0	0
2004	7	1	11	40	0	3.5	0	1.3	0	0
2004	7	1	12	0	0	4.6	0	1.2	0	0
2004	7	1	12	20	0	4.3	0	1.3	0	0
2004	7	1	12	40	0	8.1	0	1.4	0	0
2004	7	1	13	0	0	8.5	0	1.4	0	0
2004	7	1	13	20	0	8.5	0	1.3	0	0
2004	7	1	13	40	0	8.7	0	1.3	0	0
2004	7	1	14	0	0	9.3	0	1.3	0	0
2004	7	1	14	20	0	9.5	0	1.4	0	0
2004	7	1	14	40	0	9.2	0	1.2	0	0
2004	7	1	15	0	0	9.4	0	1.5	0	0
2004	7	1	15	20	0	9.9	0	1.5	0	0
2004	7	1	15	40	0	10.5	0	1.4	0	0
2004	7	1	16	0	0	9.8	0	1.4	0	0
2004	7	1	16	20	0	9.5	0	1.4	0	0
2004	7	1	16	40	0	10.1	0	1.4	0	0
2004	7	1	17	0	0	9.7	0	1.4	0	0
2004	7	1	17	20	0	10.8	0	1.3	0	0
2004	7	1	17	40	0	9.8	0	1.4	0	0
2004	7	1	18	0	0	9.4	0	1.3	0	0
2004	7	1	18	20	0	8.6	0	1.5	0	0
2004	7	1	18	40	0	8.8	0	1.4	0	0
2004	7	1	19	0	0	8.8	0	1.5	0	0
2004	7	1	19	20	0	8.4	0	1.5	0	0
2004	7	1	19	40	0	8.6	0	1.5	0	0
2004	7	1	20	0	0	8.9	0	1.5	0	0
2004	7	1	20	20	0	8.6	0	1.5	0	0
2004	7	1	20	40	0	8.2	0	1.5	0	0
2004	7	1	21	0	0	7.6	0	1.6	0	0
2004	7	1	21	20	0	7.7	0	1.6	0	0
2004	7	1	21	40	0	7	0	1.5	0	0
2004	7	1	22	0	0	7.1	0	1.7	0	0
2004	7	1	22	20	0	7.4	0	1.5	0	0
2004	7	1	22	40	0	7.3	0	1.7	0	0
2004	7	1	23	0	0	7.4	0	1.6	0	0
2004	7	1	23	20	0	6.7	0	1.4	0	0
2004	7	1	23	40	0	6.7	0	1.7	0	0
2004	7	2	0	0	0	6.6	0	1.9	0	0
2004	7	2	0	20	0	6.2	0	1.5	0	0
2004	7	2	0	40	0	6.4	0	1.5	0	0
2004	7	2	1	0	0	6.7	0	1.9	0	0
2004	7	2	1	20	0	6.2	0	1.8	0	0
2004	7	2	1	40	0	5.6	0	1.8	0	0
2004	7	2	2	0	0	4.6	0	1.5	0	0
2004	7	2	2	20	0	4.6	0	1.4	0	0
2004	7	2	2	40	0	4.3	0	1.6	0	0
2004	7	2	3	0	0	3.6	0	1.5	0	0
2004	7	2	3	20	0	3.7	0	1.5	0	0
2004	7	2	3	40	0	3.6	0	1.5	0	0
2004	7	2	4	0	0	3.3	0	1.5	0	0
2004	7	2	4	20	0	3.2	0	1.4	0	0
2004	7	2	4	40	0	3.3	0	1.4	0	0
2004	7	2	5	0	0	3	0	1.3	0	0
2004	7	2	5	20	0	2.5	0	1.4	0	0
2004	7	2	5	40	0	2.8	0	1.2	0	0
2004	7	2	6	0	0	2.9	0	1.4	0	0
2004	7	2	6	20	0	3.4	0	1.3	0	0
2004	7	2	6	40	0	3	0	1.2	0	0
2004	7	2	7	0	0	3.1	0	1.1	0	0
2004	7	2	7	20	0	3	0	1.1	0	0
2004	7	2	7	40	0	3.3	0	1.2	0	0
2004	7	2	8	0	0	3.2	0	1.3	0	0
2004	7	2	8	20	0	3.4	0	1.2	0	0
2004	7	2	8	40	0	3.4	0	1.4	0	0
2004	7	2	9	0	0	3	0	1.2	0	0
2004	7	2	9	20	0	3.2	0	1.1	0	0
2004	7	2	9	40	0	4	0	1.2	0	0
2004	7	2	10	0	0	3.8	0	1.4	0	0
2004	7	2	10	20	0	3.4	0	1.2	0	0
2004	7	2	10	40	0	3.2	0	1.2	0	0
2004	7	2	11	0	0	3.7	0	1.2	0	0
2004	7	2	11	20	0	3.8	0	1.4	0	0
2004	7	2	11	40	0	3.9	0	1.3	0	0
2004	7	2	12	0	0	3.8	0	1.3	0	0
2004	7	2	12	20	0	3.8	0	1.3	0	0
2004	7	2	12	40	0	3.8	0	1.3	0	0
2004	7	2	13	0	0	4.2	0	1.4	0	0
2004	7	2	13	20	0	3.9	0	1.3	0	0
2004	7	2	13	40	0	3.9	0	1.3	0	0
2004	7	2	14	0	0	3.8	0	1.3	0	0
2004	7	2	14	20	0	4	0	1.3	0	0
2004	7	2	14	40	0	4.2	0	1.2	0	0
2004	7	2	15	0	0	3.9	0	1.1	0	0
2004	7	2	15	20	0	4.1	0	1.2	0	0
2004	7	2	15	40	0	4.2	0	1.1	0	0
2004	7	2	16	0	0	4.2	0	1.2	0	0
2004	7	2	16	20	0	3.9	0	1.2	0	0
2004	7	2	16	40	0	3.6	0	1.3	0	0
2004	7	2	17	0	0	3.4	0	1.3	0	0
2004	7	2	17	20	0	3.1	0	1.1	0	0
2004	7	2	17	40	0	3.8	0	1.3	0	0
2004	7	2	18	0	0	3.3	0	1.2	0	0
2004	7	2	18	20	0	3.7	0	1.2	0	0
2004	7	2	18	40	0	3.2	0	1.1	0	0
2004	7	2	19	0	0	3.8	0	1	0	0
2004	7	2	19	20	0	3.4	0	1.3	0	0
2004	7	2	19	40	0	3	0	1.1	0	0
2004	7	2	20	0	0	3.6	0	1.1	0	0
2004	7	2	20	20	0	3.8	0	1	0	0
2004	7	2	20	40	0	3.8	0	0.9	0	0
2004	7	2	21	0	0	3.7	0	0.95	0	0
2004	7	2	21	20	0	4	0	1	0	0
2004	7	2	21	40	0	3.6	0	0.8	0	0
2004	7	2	22	0	0	3.9	0	0.9	0	0
2004	7	2	22	20	0	3.9	0	0.9	0	0
2004	7	2	22	40	0	3.8	0	0.9	0	0
2004	7	2	23	0	0	3.8	0	0.9	0	0
2004	7	2	23	20	0	3.8	0	0.9	0	0
2004	7	2	23	40	0	3.9	0	0.8	0	0
2004	7	3	0	0	0	4.4	0	0.9	0	0
2004	7	3	0	20	0	4.1	0	0.8	0	0
2004	7	3	0	40	0	4	0	0.7	0	0
2004	7	3	1	0	0	3.5	0	0.8	0	0
2004	7	3	1	20	0	3.6	0	0.8	0	0
2004	7	3	1	40	0	3.4	0	0.9	0	0
2004	7	3	2	0	0	3.4	0	0.8	0	0
2004	7	3	2	20	0	3.8	0	0.8	0	0
2004	7	3	2	40	0	4.2	0	1	0	0
2004	7	3	3	0	0	3.4	0	0.9	0	0
2004	7	3	3	20	0	3	0	0.8	0	0
2004	7	3	3	40	0	3	0	0.9	0	0
2004	7	3	4	0	0	1.7	0	1.1	0	0
2004	7	3	4	20	0	1	0	0.9	0	0
2004	7	3	4	40	0	0.7	0	0.9	0	0
2004	7	3	5	0	0	0.9	0	1	0	0
2004	7	3	5	20	0	0.9	0	1	0	0
2004	7	3	5	40	0	1	0	1	0	0
2004	7	3	6	0	0	1	0	1.1	0	0
2004	7	3	6	20	0	1.7	0	0.8	0	0
2004	7	3	6	40	0	1.3	0	0.8	0	0
2004	7	3	7	0	0	1.3	0	0.8	0	0
2004	7	3	7	20	0	2	0	0.95	0	0
2004	7	3	7	40	0	2.8	0	1.1	0	0
2004	7	3	8	0	0	2.7	0	1.1	0	0
2004	7	3	8	20	0	3.4	0	0.9	0	0
2004	7	3	8	40	0	2.3	0	0.8	0	0
2004	7	3	9	0	0	2.6	0	0.9	0	0
2004	7	3	9	20	0	2.5	0	0.9	0	0
2004	7	3	9	40	0	1.5	0	0.8	0	0
2004	7	3	10	0	0	2.2	0	0.9	0	0
2004	7	3	10	20	0	2.3	0	0.8	0	0
2004	7	3	10	40	0	2.2	0	0.8	0	0
2004	7	3	11	0	0	2.2	0	0.8	0	0
2004	7	3	11	20	0	2.3	0	0.7	0	0
2004	7	3	11	40	0	3.2	0	0.7	0	0
2004	7	3	12	0	0	3.9	0	0.7	0	0
2004	7	3	12	20	0	2.7	0	0.7	0	0
2004	7	3	12	40	0	2.8	0	0.7	0	0
2004	7	3	13	0	0	3.2	0	0.9	0	0
2004	7	3	13	20	0	3	0	0.6	0	0
2004	7	3	13	40	0	2.9	0	0.7	0	0
2004	7	3	14	0	0	2.9	0	0.7	0	0
2004	7	3	14	20	0	3	0	0.7	0	0
2004	7	3	14	40	0	2.5	0	0.7	0	0
2004	7	3	15	0	0	2.2	0	0.7	0	0
2004	7	3	15	20	0	2.3	0	0.8	0	0
2004	7	3	15	40	0	2	0	0.6	0	0
2004	7	3	16	0	0	2.3	0	0.8	0	0
2004	7	3	16	20	0	2.2	0	0.7	0	0
2004	7	3	16	40	0	2.2	0	0.7	0	0
2004	7	3	17	0	0	2.2	0	0.8	0	0
2004	7	3	17	20	0	2	0	0.7	0	0
2004	7	3	17	40	0	1.9	0	0.8	0	0
2004	7	3	18	0	0	2.1	0	0.8	0	0
2004	7	3	18	20	0	2.2	0	0.9	0	0
2004	7	3	18	40	0	2.2	0	0.8	0	0
2004	7	3	19	0	0	2.3	0	0.9	0	0
2004	7	3	19	20	0	2.4	0	0.8	0	0
2004	7	3	19	40	0	2.2	0	0.8	0	0
2004	7	3	20	0	0	2.1	0	0.8	0	0
2004	7	3	20	20	0	2.5	0	0.8	0	0
2004	7	3	20	40	0	2.4	0	0.8	0	0
2004	7	3	21	0	0	2	0	0.7	0	0
2004	7	3	21	20	0	1.6	0	0.7	0	0
2004	7	3	21	40	0	2	0	0.7	0	0
2004	7	3	22	0	0	1.5	0	0.7	0	0
2004	7	3	22	20	0	1.5	0	0.6	0	0
2004	7	3	22	40	0	2.2	0	0.7	0	0
2004	7	3	23	0	0	1.7	0	0.7	0	0
2004	7	3	23	20	0	1.7	0	0.6	0	0
2004	7	3	23	40	0	1.4	0	0.6	0	0
2004	7	4	0	0	0	1.5	0	0.6	0	0
2004	7	4	0	20	0	1.3	0	0.6	0	0
2004	7	4	0	40	0	0.8	0	0.6	0	0
2004	7	4	1	0	0	0.9	0	0.6	0	0
2004	7	4	1	20	0	0.8	0	0.7	0	0
2004	7	4	1	40	0	0.9	0	0.7	0	0
2004	7	4	2	0	0	0.9	0	0.7	0	0
2004	7	4	2	20	0	1	0	0.7	0	0
2004	7	4	2	40	0	1.8	0	0.6	0	0
2004	7	4	3	0	0	1	0	0.6	0	0
2004	7	4	3	20	0	1	0	0.6	0	0
2004	7	4	3	40	0	1.3	0	0.6	0	0
2004	7	4	4	0	0	1.6	0	0.7	0	0
2004	7	4	4	20	0	1.7	0	0.6	0	0
2004	7	4	4	40	0	1.7	0	0.6	0	0
2004	7	4	5	0	0	1.6	0	0.6	0	0
2004	7	4	5	20	0	2	0	0.6	0	0
2004	7	4	5	40	0	2	0	0.6	0	0
2004	7	4	6	0	0	1.5	0	0.6	0	0
2004	7	4	6	20	0	1.8	0	0.6	0	0
2004	7	4	6	40	0	1.8	0	0.6	0	0
2004	7	4	7	0	0	1.6	0	0.6	0	0
2004	7	4	7	20	0	1.6	0	0.6	0	0
2004	7	4	7	40	0	1.6	0	0.7	0	0
2004	7	4	8	0	0	1.3	0	0.9	0	0
2004	7	4	8	20	0	1.2	0	0.7	0	0
2004	7	4	8	40	0	1.7	0	0.7	0	0
2004	7	4	9	0	0	1.9	0	0.7	0	0
2004	7	4	9	20	0	1.6	0	0.7	0	0
2004	7	4	9	40	0	1.6	0	0.7	0	0
2004	7	4	10	0	0	1	0	0.7	0	0
2004	7	4	10	20	0	2.2	0	0.6	0	0
2004	7	4	10	40	0	2.7	0	0.6	0	0
2004	7	4	11	0	0	2.3	0	0.7	0	0
2004	7	4	11	20	0	2	0	0.6	0	0
2004	7	4	11	40	0	2	0	0.6	0	0
2004	7	4	12	0	0	1.6	0	0.7	0	0
2004	7	4	12	20	0	1.5	0	0.6	0	0
2004	7	4	12	40	0	2	0	0.6	0	0
2004	7	4	13	0	0	1.6	0	0.7	0	0
2004	7	4	13	20	0	1.6	0	0.7	0	0
2004	7	4	13	40	0	1.6	0	0.8	0	0
2004	7	4	14	0	0	1.5	0	0.7	0	0
2004	7	4	14	20	0	1.7	0	0.8	0	0
2004	7	4	14	40	0	1.9	0	0.7	0	0
2004	7	4	15	0	0	2.3	0	0.8	0	0
2004	7	4	15	20	0	2.4	0	0.6	0	0
2004	7	4	15	40	0	2.6	0	0.8	0	0
2004	7	4	16	0	0	2.9	0	0.8	0	0
2004	7	4	16	20	0	3.2	0	0.8	0	0
2004	7	4	16	40	0	3.2	0	0.8	0	0
2004	7	4	17	0	0	3.1	0	0.8	0	0
2004	7	4	17	20	0	3.4	0	0.8	0	0
2004	7	4	17	40	0	3	0	0.7	0	0
2004	7	4	18	0	0	2.7	0	0.7	0	0
2004	7	4	18	20	0	4.8	0	0.7	0	0
2004	7	4	18	40	0	4.2	0	0.8	0	0
2004	7	4	19	0	0	3.9	0	0.8	0	0
2004	7	4	19	20	0	3.3	0	0.7	0	0
2004	7	4	19	40	0	2.9	0	0.7	0	0
2004	7	4	20	0	0	2.6	0	0.7	0	0
2004	7	4	20	20	0	2.8	0	0.7	0	0
2004	7	4	20	40	0	3.1	0	0.8	0	0
2004	7	4	21	0	0	2.7	0	0.7	0	0
2004	7	4	21	20	0	2.5	0	0.7	0	0
2004	7	4	21	40	0	2.3	0	0.7	0	0
2004	7	4	22	0	0	2.3	0	0.7	0	0
2004	7	4	22	20	0	1.9	0	0.7	0	0
2004	7	4	22	40	0	1.7	0	0.7	0	0
2004	7	4	23	0	0	1.7	0	0.8	0	0
2004	7	4	23	20	0	1.9	0	0.6	0	0
2004	7	4	23	40	0	3.3	0	0.7	0	0
2004	7	5	0	0	0	4.2	0	0.7	0	0
2004	7	5	0	20	0	4.2	0	0.8	0	0
2004	7	5	0	40	0	3.4	0	0.7	0	0
2004	7	5	1	0	0	5.3	0	0.7	0	0
2004	7	5	1	20	0	5.7	0	0.7	0	0
2004	7	5	1	40	0	4.7	0	0.8	0	0
2004	7	5	2	0	0	5.3	0	0.8	0	0
2004	7	5	2	20	0	5.1	0	0.7	0	0
2004	7	5	2	40	0	5	0	0.8	0	0
2004	7	5	3	0	0	5.1	0	0.8	0	0
2004	7	5	3	20	0	5	0	0.8	0	0
2004	7	5	3	40	0	5.2	0	0.6	0	0
2004	7	5	4	0	0	5	0	0.8	0	0
2004	7	5	4	20	0	6.7	0	0.7	0	0
2004	7	5	4	40	0	5.8	0	0.7	0	0
2004	7	5	5	0	0	4.7	0	0.7	0	0
2004	7	5	5	20	0	4.9	0	0.6	0	0
2004	7	5	5	40	0	4.8	0	0.7	0	0
2004	7	5	6	0	0	6.4	0	0.6	0	0
2004	7	5	6	20	0	5.8	0	0.7	0	0
2004	7	5	6	40	0	5	0	0.6	0	0
2004	7	5	7	0	0	4.4	0	0.65	0	0
2004	7	5	7	20	0	4.1	0	0.7	0	0
2004	7	5	7	40	0	4.3	0	0.7	0	0
2004	7	5	8	0	0	4.3	0	0.7	0	0
2004	7	5	8	20	0	4.3	0	0.7	0	0
2004	7	5	8	40	0	4	0	0.6	0	0
2004	7	5	9	0	0	5.6	0	0.6	0	0
2004	7	5	9	20	0	8.4	0	0.7	0	0
2004	7	5	9	40	0	7.7	0	0.7	0	0
2004	7	5	10	0	0	7.5	0	0.8	0	0
2004	7	5	10	20	0	6.3	0	0.9	0	0
2004	7	5	10	40	0	5.8	0	0.9	0	0
2004	7	5	11	0	0	5.3	0	0.9	0	0
2004	7	5	11	20	0	4.4	0	0.9	0	0
2004	7	5	11	40	0	4.5	0	0.8	0	0
2004	7	5	12	0	0	5.4	0	0.9	0	0
2004	7	5	12	20	0	5.1	0	0.8	0	0
2004	7	5	12	40	0	7.5	0	0.8	0	0
2004	7	5	13	0	0	5.8	0	0.9	0	0
2004	7	5	13	20	0	5.3	0	1	0	0
2004	7	5	13	40	0	5.6	0	1	0	0
2004	7	5	14	0	0	5.8	0	0.8	0	0
2004	7	5	14	20	0	6.9	0	1	0	0
2004	7	5	14	40	0	7.1	0	1.1	0	0
2004	7	5	15	0	0	6.5	0	1	0	0
2004	7	5	15	20	0	6.2	0	1	0	0
2004	7	5	15	40	0	6.4	0	1.1	0	0
2004	7	5	16	0	0	6.3	0	1	0	0
2004	7	5	16	20	0	6	0	0.9	0	0
2004	7	5	16	40	0	6.1	0	1.1	0	0
2004	7	5	17	0	0	6.3	0	1	0	0
2004	7	5	17	20	0	6.9	0	1.1	0	0
2004	7	5	17	40	0	6.4	0	0.9	0	0
2004	7	5	18	0	0	6.7	0	1	0	0
2004	7	5	18	20	0	6.2	0	0.9	0	0
2004	7	5	18	40	0	6.9	0	1	0	0
2004	7	5	19	0	0	6.4	0	1	0	0
2004	7	5	19	20	0	6.6	0	1	0	0
2004	7	5	19	40	0	7.3	0	1	0	0
2004	7	5	20	0	0	7.3	0	1	0	0
2004	7	5	20	20	0	7.1	0	1	0	0
2004	7	5	20	40	0	6.9	0	1.1	0	0
2004	7	5	21	0	0	7.2	0	1.1	0	0
2004	7	5	21	20	0	7	0	1.1	0	0
2004	7	5	21	40	0	7.1	0	1.1	0	0
2004	7	5	22	0	0	7.9	0	1.1	0	0
2004	7	5	22	20	0	8	0	1.2	0	0
2004	7	5	22	40	0	7.5	0	1.2	0	0
2004	7	5	23	0	0	7.1	0	1.2	0	0
2004	7	5	23	20	0	6.8	0	1.2	0	0
2004	7	5	23	40	0	6.1	0	1.2	0	0
2004	7	6	0	0	0	5.7	0	1.1	0	0
2004	7	6	0	20	0	5.4	0	1.3	0	0
2004	7	6	0	40	0	4.8	0	1.3	0	0
2004	7	6	1	0	0	4.6	0	1.2	0	0
2004	7	6	1	20	0	4.7	0	1.2	0	0
2004	7	6	1	40	0	4.5	0	1.1	0	0
2004	7	6	2	0	0	4.7	0	1	0	0
2004	7	6	2	20	0	4.4	0	1.1	0	0
2004	7	6	2	40	0	4.7	0	1	0	0
2004	7	6	3	0	0	5.4	0	1.1	0	0
2004	7	6	3	20	0	4.9	0	1	0	0
2004	7	6	3	40	0	3.8	0	1.1	0	0
2004	7	6	4	0	0	4.1	0	1	0	0
2004	7	6	4	20	0	4.2	0	0.9	0	0
2004	7	6	4	40	0	5.2	0	1.1	0	0
2004	7	6	5	0	0	4.8	0	1	0	0
2004	7	6	5	20	0	4.9	0	0.9	0	0
2004	7	6	5	40	0	5.8	0	0.9	0	0
2004	7	6	6	0	0	5.4	0	0.8	0	0
2004	7	6	6	20	0	4.9	0	0.9	0	0
2004	7	6	6	40	0	5	0	0.8	0	0
2004	7	6	7	0	0	4.9	0	0.9	0	0
2004	7	6	7	20	0	5	0	0.8	0	0
2004	7	6	7	40	0	5	0	0.8	0	0
2004	7	6	8	0	0	5	0	0.9	0	0
2004	7	6	8	20	0	6.2	0	0.8	0	0
2004	7	6	8	40	0	5.7	0	0.9	0	0
2004	7	6	9	0	0	4.2	0	0.9	0	0
2004	7	6	9	20	0	6.4	0	0.8	0	0
2004	7	6	9	40	0	5	0	0.9	0	0
2004	7	6	10	0	0	4	0	0.9	0	0
2004	7	6	10	20	0	5.1	0	0.9	0	0
2004	7	6	10	40	0	5.9	0	1.1	0	0
2004	7	6	11	0	0	5.5	0	0.8	0	0
2004	7	6	11	20	0	5.4	0	0.9	0	0
2004	7	6	11	40	0	5.6	0	0.9	0	0
2004	7	6	12	0	0	5.2	0	0.8	0	0
2004	7	6	12	20	0	4.6	0	1	0	0
2004	7	6	12	40	0	5.3	0	1	0	0
2004	7	6	13	0	0	8.7	0	0.9	0	0
2004	7	6	13	20	0	6.3	0	0.9	0	0
2004	7	6	13	40	0	4.8	0	1	0	0
2004	7	6	14	0	0	4.8	0	0.9	0	0
2004	7	6	14	20	0	5.8	0	1.1	0	0
2004	7	6	14	40	0	6.7	0	0.9	0	0
2004	7	6	15	0	0	7.4	0	1	0	0
2004	7	6	15	20	0	6.2	0	1.1	0	0
2004	7	6	15	40	0	5.6	0	1	0	0
2004	7	6	16	0	0	6.1	0	1	0	0
2004	7	6	16	20	0	6.6	0	0.9	0	0
2004	7	6	16	40	0	8	0	1	0	0
2004	7	6	17	0	0	7.5	0	1	0	0
2004	7	6	17	20	0	6.9	0	1	0	0
2004	7	6	17	40	0	6.6	0	1.2	0	0
2004	7	6	18	0	0	6.8	0	1	0	0
2004	7	6	18	20	0	7	0	1	0	0
2004	7	6	18	40	0	5.4	0	1	0	0
2004	7	6	19	0	0	4.2	0	1	0	0
2004	7	6	19	20	0	6.3	0	1	0	0
2004	7	6	19	40	0	6.5	0	0.9	0	0
2004	7	6	20	0	0	6.2	0	1	0	0
2004	7	6	20	20	0	6.3	0	0.9	0	0
2004	7	6	20	40	0	6.4	0	1	0	0
2004	7	6	21	0	0	6.3	0	1	0	0
2004	7	6	21	20	0	6.3	0	1	0	0
2004	7	6	21	40	0	6.2	0	1	0	0
2004	7	6	22	0	0	6.1	0	1.1	0	0
2004	7	6	22	20	0	5.6	0	0.9	0	0
2004	7	6	22	40	0	5.5	0	1.1	0	0
2004	7	6	23	0	0	5.2	0	1	0	0
2004	7	6	23	20	0	5.3	0	0.9	0	0
2004	7	6	23	40	0	5.3	0	1	0	0
2004	7	7	0	0	0	5.6	0	1.1	0	0
2004	7	7	0	20	0	5.6	0	0.9	0	0
2004	7	7	0	40	0	5.7	0	1	0	0
2004	7	7	1	0	0	6.1	0	0.9	0	0
2004	7	7	1	20	0	7.2	0	1	0	0
2004	7	7	1	40	0	6.6	0	1	0	0
2004	7	7	2	0	0	6.7	0	1	0	0
2004	7	7	2	20	0	6.1	0	1.1	0	0
2004	7	7	2	40	0	6.4	0	0.9	0	0
2004	7	7	3	0	0	7.1	0	1	0	0
2004	7	7	3	20	0	8.3	0	1	0	0
2004	7	7	3	40	0	8.2	0	1	0	0
2004	7	7	4	0	0	8.2	0	1	0	0
2004	7	7	4	20	0	7.2	0	1.1	0	0
2004	7	7	4	40	0	7.1	0	1.1	0	0
2004	7	7	5	0	0	7.7	0	1.1	0	0
2004	7	7	5	20	0	8.1	0	1	0	0
2004	7	7	5	40	0	7.5	0	1.1	0	0
2004	7	7	6	0	0	8.1	0	1.1	0	0
2004	7	7	6	20	0	8.2	0	1.1	0	0
2004	7	7	6	40	0	6.8	0	1.1	0	0
2004	7	7	7	0	0	7.8	0	1.2	0	0
2004	7	7	7	20	0	7.5	0	1.1	0	0
2004	7	7	7	40	0	6.8	0	1.2	0	0
2004	7	7	8	0	0	7.1	0	1.1	0	0
2004	7	7	8	20	0	7	0	1.1	0	0
2004	7	7	8	40	0	6.6	0	1.2	0	0
2004	7	7	9	0	0	6.1	0	1.2	0	0
2004	7	7	9	20	0	6.1	0	1.1	0	0
2004	7	7	9	40	0	6.2	0	1.1	0	0
2004	7	7	10	0	0	6.8	0	1.2	0	0
2004	7	7	10	20	0	6.3	0	1.1	0	0
2004	7	7	10	40	0	6.3	0	1	0	0
2004	7	7	11	0	0	7	0	1.2	0	0
2004	7	7	11	20	0	6.1	0	1	0	0
2004	7	7	11	40	0	6.8	0	1.1	0	0
2004	7	7	12	0	0	6.9	0	1.1	0	0
2004	7	7	12	20	0	6.7	0	1.1	0	0
2004	7	7	12	40	0	6.9	0	1	0	0
2004	7	7	13	0	0	6.5	0	1.2	0	0
2004	7	7	13	20	0	6.6	0	1.2	0	0
2004	7	7	13	40	0	6.3	0	1.2	0	0
2004	7	7	14	0	0	6.3	0	1.1	0	0
2004	7	7	14	20	0	6.5	0	1.1	0	0
2004	7	7	14	40	0	8	0	1.1	0	0
2004	7	7	15	0	0	7.1	0	1.1	0	0
2004	7	7	15	20	0	6.7	0	1.1	0	0
2004	7	7	15	40	0	6.4	0	1.1	0	0
2004	7	7	16	0	0	6.4	0	1.1	0	0
2004	7	7	16	20	0	6.9	0	1	0	0
2004	7	7	16	40	0	6.8	0	1	0	0
2004	7	7	17	0	0	6.6	0	1.1	0	0
2004	7	7	17	20	0	6.5	0	1.1	0	0
2004	7	7	17	40	0	6.6	0	1.1	0	0
2004	7	7	18	0	0	6.1	0	1	0	0
2004	7	7	18	20	0	6.4	0	1.1	0	0
2004	7	7	18	40	0	6	0	1.1	0	0
2004	7	7	19	0	0	6	0	1	0	0
2004	7	7	19	20	0	6.1	0	1.1	0	0
2004	7	7	19	40	0	5.6	0	1.1	0	0
2004	7	7	20	0	0	5	0	1	0	0
2004	7	7	20	20	0	5	0	0.9	0	0
2004	7	7	20	40	0	5.2	0	0.95	0	0
2004	7	7	21	0	0	5.4	0	1	0	0
2004	7	7	21	20	0	5.6	0	1.1	0	0
2004	7	7	21	40	0	5.7	0	1.1	0	0
2004	7	7	22	0	0	5.5	0	1.1	0	0
2004	7	7	22	20	0	5.2	0	1	0	0
2004	7	7	22	40	0	4.2	0	1	0	0
2004	7	7	23	0	0	4.5	0	1	0	0
2004	7	7	23	20	0	4.2	0	1	0	0
2004	7	7	23	40	0	4.4	0	1	0	0
2004	7	8	0	0	0	4.4	0	1	0	0
2004	7	8	0	20	0	4.3	0	1	0	0
2004	7	8	0	40	0	4.4	0	0.9	0	0
2004	7	8	1	0	0	4.5	0	0.9	0	0
2004	7	8	1	20	0	5.4	0	0.7	0	0
2004	7	8	1	40	0	4.2	0	0.8	0	0
2004	7	8	2	0	0	3.8	0	0.8	0	0
2004	7	8	2	20	0	4.2	0	0.8	0	0
2004	7	8	2	40	0	3.4	0	0.8	0	0
2004	7	8	3	0	0	4.5	0	0.9	0	0
2004	7	8	3	20	0	3.8	0	0.8	0	0
2004	7	8	3	40	0	4	0	0.8	0	0
2004	7	8	4	0	0	4.4	0	0.8	0	0
2004	7	8	4	20	0	6.4	0	0.8	0	0
2004	7	8	4	40	0	4.4	0	0.7	0	0
2004	7	8	5	0	0	4.1	0	0.7	0	0
2004	7	8	5	20	0	5.2	0	0.7	0	0
2004	7	8	5	40	0	4.3	0	0.7	0	0
2004	7	8	6	0	0	4.5	0	0.7	0	0
2004	7	8	6	20	0	4	0	0.7	0	0
2004	7	8	6	40	0	5.2	0	0.7	0	0
2004	7	8	7	0	0	4.7	0	0.7	0	0
2004	7	8	7	20	0	4.8	0	0.7	0	0
2004	7	8	7	40	0	6.9	0	0.7	0	0
2004	7	8	8	0	0	4.7	0	0.8	0	0
2004	7	8	8	20	0	5	0	0.7	0	0
2004	7	8	8	40	0	5.5	0	0.7	0	0
2004	7	8	9	0	0	5.2	0	0.6	0	0
2004	7	8	9	20	0	5.2	0	0.6	0	0
2004	7	8	9	40	0	5.9	0	0.7	0	0
2004	7	8	10	0	0	5.1	0	0.7	0	0
2004	7	8	10	20	0	4.9	0	0.8	0	0
2004	7	8	10	40	0	4.9	0	0.7	0	0
2004	7	8	11	0	0	5.5	0	0.7	0	0
2004	7	8	11	20	0	5.8	0	0.7	0	0
2004	7	8	11	40	0	5.4	0	0.75	0	0
2004	7	8	12	0	0	4.9	0	0.8	0	0
2004	7	8	12	20	0	5.6	0	0.8	0	0
2004	7	8	12	40	0	6.3	0	0.8	0	0
2004	7	8	13	0	0	7	0	0.8	0	0
2004	7	8	13	20	0	5.2	0	0.8	0	0
2004	7	8	13	40	0	5.2	0	0.8	0	0
2004	7	8	14	0	0	5.4	0	0.8	0	0
2004	7	8	14	20	0	5.8	0	0.7	0	0
2004	7	8	14	40	0	5.4	0	0.8	0	0
2004	7	8	15	0	0	5.6	0	0.8	0	0
2004	7	8	15	20	0	5.5	0	0.8	0	0
2004	7	8	15	40	0	5.2	0	0.8	0	0
2004	7	8	16	0	0	5.3	0	0.9	0	0
2004	7	8	16	20	0	5.7	0	0.9	0	0
2004	7	8	16	40	0	5.6	0	0.9	0	0
2004	7	8	17	0	0	6.1	0	0.9	0	0
2004	7	8	17	20	0	6.5	0	0.9	0	0
2004	7	8	17	40	0	6.4	0	0.9	0	0
2004	7	8	18	0	0	6.1	0	0.9	0	0
2004	7	8	18	20	0	5.8	0	0.9	0	0
2004	7	8	18	40	0	6	0	0.9	0	0
2004	7	8	19	0	0	6	0	0.9	0	0
2004	7	8	19	20	0	5.8	0	0.9	0	0
2004	7	8	19	40	0	5.8	0	0.9	0	0
2004	7	8	20	0	0	5.3	0	0.9	0	0
2004	7	8	20	20	0	5.6	0	1	0	0
2004	7	8	20	40	0	5.6	0	0.9	0	0
2004	7	8	21	0	0	5.6	0	1	0	0
2004	7	8	21	20	0	6.1	0	1.1	0	0
2004	7	8	21	40	0	5.3	0	1.05	0	0
2004	7	8	22	0	0	5.3	0	1	0	0
2004	7	8	22	20	0	5.2	0	0.9	0	0
2004	7	8	22	40	0	4.9	0	1	0	0
2004	7	8	23	0	0	5	0	1	0	0
2004	7	8	23	20	0	4.8	0	1	0	0
2004	7	8	23	40	0	4.8	0	1	0	0
2004	7	9	0	0	0	5.5	0	1	0	0
2004	7	9	0	20	0	4.9	0	1.1	0	0
2004	7	9	0	40	0	4.8	0	1.2	0	0
2004	7	9	1	0	0	5	0	0.9	0	0
2004	7	9	1	20	0	6.1	0	1	0	0
2004	7	9	1	40	0	7.1	0	1	0	0
2004	7	9	2	0	0	7	0	1	0	0
2004	7	9	2	20	0	7.4	0	1	0	0
2004	7	9	2	40	0	8.1	0	1.1	0	0
2004	7	9	3	0	0	8.5	0	1	0	0
2004	7	9	3	20	0	8.4	0	1.1	0	0
2004	7	9	3	40	0	6.6	0	1.1	0	0
2004	7	9	4	0	0	7.3	0	1.2	0	0
2004	7	9	4	20	0	6.8	0	1.1	0	0
2004	7	9	4	40	0	6.5	0	1.3	0	0
2004	7	9	5	0	0	6.6	0	1.1	0	0
2004	7	9	5	20	0	7.8	0	1.1	0	0
2004	7	9	5	40	0	6.8	0	1.2	0	0
2004	7	9	6	0	0	6.4	0	1.2	0	0
2004	7	9	6	20	0	7.3	0	1.2	0	0
2004	7	9	6	40	0	6.4	0	1.2	0	0
2004	7	9	7	0	0	6.4	0	1.2	0	0
2004	7	9	7	20	0	5.7	0	1.2	0	0
2004	7	9	7	40	0	5.6	0	1.1	0	0
2004	7	9	8	0	0	5.5	0	1.2	0	0
2004	7	9	8	20	0	5.6	0	1.1	0	0
2004	7	9	8	40	0	5.5	0	1.1	0	0
2004	7	9	9	0	0	5	0	1.2	0	0
2004	7	9	9	20	0	4.2	0	1.3	0	0
2004	7	9	9	40	0	4.8	0	1.3	0	0
2004	7	9	10	0	0	5.6	0	1.2	0	0
2004	7	9	10	20	0	5.5	0	1.2	0	0
2004	7	9	10	40	0	5.6	0	1.3	0	0
2004	7	9	11	0	0	5.1	0	1.2	0	0
2004	7	9	11	20	0	4.7	0	1.3	0	0
2004	7	9	11	40	0	5.1	0	1.1	0	0
2004	7	9	12	0	0	4.7	0	1.2	0	0
2004	7	9	12	20	0	4.7	0	1.4	0	0
2004	7	9	12	40	0	4	0	1.1	0	0
2004	7	9	13	0	0	4.5	0	1.3	0	0
2004	7	9	13	20	0	4.6	0	1.3	0	0
2004	7	9	13	40	0	4.7	0	1.5	0	0
2004	7	9	14	0	0	4.9	0	1.4	0	0
2004	7	9	14	20	0	5.5	0	1.4	0	0
2004	7	9	14	40	0	5.2	0	1.5	0	0
2004	7	9	15	0	0	5.4	0	1.6	0	0
2004	7	9	15	20	0	5.5	0	1.6	0	0
2004	7	9	15	40	0	5.3	0	1.4	0	0
2004	7	9	16	0	0	4.8	0	1.5	0	0
2004	7	9	16	20	0	4.9	0	1.6	0	0
2004	7	9	16	40	0	6	0	1.4	0	0
2004	7	9	17	0	0	4.7	0	1.4	0	0
2004	7	9	17	20	0	5.5	0	1.5	0	0
2004	7	9	17	40	0	6.2	0	1.6	0	0
2004	7	9	18	0	0	6.4	0	1.4	0	0
2004	7	9	18	20	0	7.6	0	1.5	0	0
2004	7	9	18	40	0	6.6	0	1.5	0	0
2004	7	9	19	0	0	6.1	0	1.4	0	0
2004	7	9	19	20	0	6	0	1.8	0	0
2004	7	9	19	40	0	5.8	0	1.6	0	0
2004	7	9	20	0	0	6	0	1.8	0	0
2004	7	9	20	20	0	6.3	0	1.6	0	0
2004	7	9	20	40	0	5.9	0	1.6	0	0
2004	7	9	21	0	0	6.8	0	1.6	0	0
2004	7	9	21	20	0	6.5	0	1.6	0	0
2004	7	9	21	40	0	6.5	0	1.7	0	0
2004	7	9	22	0	0	6.3	0	1.6	0	0
2004	7	9	22	20	0	6.3	0	1.7	0	0
2004	7	9	22	40	0	6.4	0	1.7	0	0
2004	7	9	23	0	0	6.4	0	1.6	0	0
2004	7	9	23	20	0	6.2	0	1.55	0	0
2004	7	9	23	40	0	5.9	0	1.5	0	0
2004	7	10	0	0	0	5.4	0	1.5	0	0
2004	7	10	0	20	0	5.3	0	1.5	0	0
2004	7	10	0	40	0	5.1	0	1.6	0	0
2004	7	10	1	0	0	5.2	0	1.6	0	0
2004	7	10	1	20	0	5.2	0	1.6	0	0
2004	7	10	1	40	0	4.8	0	1.5	0	0
2004	7	10	2	0	0	4.9	0	1.6	0	0
2004	7	10	2	20	0	5.2	0	1.8	0	0
2004	7	10	2	40	0	5.2	0	1.7	0	0
2004	7	10	3	0	0	5.1	0	1.6	0	0
2004	7	10	3	20	0	4.8	0	1.5	0	0
2004	7	10	3	40	0	5.1	0	1.9	0	0
2004	7	10	4	0	0	5.7	0	1.9	0	0
2004	7	10	4	20	0	4.1	0	1.8	0	0
2004	7	10	4	40	0	3.3	0	1.5	0	0
2004	7	10	5	0	0	4.8	0	1.7	0	0
2004	7	10	5	20	0	4.6	0	1.75	0	0
2004	7	10	5	40	0	4.5	0	1.8	0	0
2004	7	10	6	0	0	4.6	0	1.7	0	0
2004	7	10	6	20	0	4.5	0	2	0	0
2004	7	10	6	40	0	4.5	0	1.8	0	0
2004	7	10	7	0	0	4.5	0	1.8	0	0
2004	7	10	7	20	0	4.2	0	1.8	0	0
2004	7	10	7	40	0	4.1	0	1.5	0	0
2004	7	10	8	0	0	5.4	0	1.6	0	0
2004	7	10	8	20	0	4.9	0	1.4	0	0
2004	7	10	8	40	0	4.6	0	1.5	0	0
2004	7	10	9	0	0	4.4	0	1.5	0	0
2004	7	10	9	20	0	4.3	0	1.6	0	0
2004	7	10	9	40	0	4.5	0	1.6	0	0
2004	7	10	10	0	0	4.4	0	1.7	0	0
2004	7	10	10	20	0	4.3	0	1.3	0	0
2004	7	10	10	40	0	4.7	0	1.5	0	0
2004	7	10	11	0	0	3.3	0	1.4	0	0
2004	7	10	11	20	0	4.1	0	1.4	0	0
2004	7	10	11	40	0	4.4	0	1.4	0	0
2004	7	10	12	0	0	6.1	0	1.3	0	0
2004	7	10	12	20	0	4.8	0	1.3	0	0
2004	7	10	12	40	0	3.2	0	1.4	0	0
2004	7	10	13	0	0	3.3	0	1.3	0	0
2004	7	10	13	20	0	3.3	0	1.4	0	0
2004	7	10	13	40	0	2.7	0	1.4	0	0
2004	7	10	14	0	0	1.9	0	1.4	0	0
2004	7	10	14	20	0	1.3	0	1.4	0	0
2004	7	10	14	40	0	1.2	0	1.5	0	0
2004	7	10	15	0	0	2.3	0	1.3	0	0
2004	7	10	15	20	0	2.8	0	1.5	0	0
2004	7	10	15	40	0	2.2	0	1.3	0	0
2004	7	10	16	0	0	2.2	0	1.2	0	0
2004	7	10	16	20	0	1.6	0	1.4	0	0
2004	7	10	16	40	0	1.5	0	1.1	0	0
2004	7	10	17	0	0	1.2	0	1.3	0	0
2004	7	10	17	20	0	0.5	0	1.2	0	0
2004	7	10	17	40	0	0.5	0	1.3	0	0
2004	7	10	18	0	0	0.8	0	1.6	0	0
2004	7	10	18	20	0	1	0	1.6	0	0
2004	7	10	18	40	0	1	0	1.5	0	0
2004	7	10	19	0	0	1.2	0	1.3	0	0
2004	7	10	19	20	0	1.4	0	1.3	0	0
2004	7	10	19	40	0	1.5	0	1.4	0	0
2004	7	10	20	0	0	2.7	0	1.2	0	0
2004	7	10	20	20	0	5.1	0	1.2	0	0
2004	7	10	20	40	0	5.4	0	1.4	0	0
2004	7	10	21	0	0	4.9	0	1.4	0	0
2004	7	10	21	20	0	5.1	0	1.35	0	0
2004	7	10	21	40	0	4.2	0	1.3	0	0
2004	7	10	22	0	0	4.2	0	1.2	0	0
2004	7	10	22	20	0	4.4	0	1.1	0	0
2004	7	10	22	40	0	4.6	0	1.2	0	0
2004	7	10	23	0	0	5.1	0	1.2	0	0
2004	7	10	23	20	0	5.6	0	1.1	0	0
2004	7	10	23	40	0	4.9	0	1.1	0	0
2004	7	11	0	0	0	6.1	0	1.1	0	0
2004	7	11	0	20	0	6.2	0	1.1	0	0
2004	7	11	0	40	0	6	0	1.1	0	0
2004	7	11	1	0	0	7.2	0	1.2	0	0
2004	7	11	1	20	0	7.4	0	1	0	0
2004	7	11	1	40	0	7.3	0	1.2	0	0
2004	7	11	2	0	0	7.2	0	1.1	0	0
2004	7	11	2	20	0	7.6	0	1.1	0	0
2004	7	11	2	40	0	8.1	0	1.1	0	0
2004	7	11	3	0	0	8.5	0	1.2	0	0
2004	7	11	3	20	0	7.4	0	1.2	0	0
2004	7	11	3	40	0	7.6	0	1.2	0	0
2004	7	11	4	0	0	8	0	1.2	0	0
2004	7	11	4	20	0	8.7	0	1.4	0	0
2004	7	11	4	40	0	8.1	0	1.5	0	0
2004	7	11	5	0	0	9	0	1.6	0	0
2004	7	11	5	20	0	7.5	0	1.6	0	0
2004	7	11	5	40	0	9.4	0	1.6	0	0
2004	7	11	6	0	0	9.3	0	1.8	0	0
2004	7	11	6	20	0	8.6	0	1.8	0	0
2004	7	11	6	40	0	8.5	0	2.1	0	0
2004	7	11	7	0	0	9.3	0	1.9	0	0
2004	7	11	7	20	0	8.9	0	1.9	0	0
2004	7	11	7	40	0	8.9	0	2	0	0
2004	7	11	8	0	0	9.3	0	1.9	0	0
2004	7	11	8	20	0	8.3	0	2.2	0	0
2004	7	11	8	40	0	8.6	0	1.9	0	0
2004	7	11	9	0	0	9.5	0	2.3	0	0
2004	7	11	9	20	0	8.9	0	2	0	0
2004	7	11	9	40	0	8.5	0	1.9	0	0
2004	7	11	10	0	0	7.1	0	1.8	0	0
2004	7	11	10	20	0	8.6	0	2.2	0	0
2004	7	11	10	40	0	9.1	0	1.9	0	0
2004	7	11	11	0	0	9.5	0	1.8	0	0
2004	7	11	11	20	0	8.8	0	1.9	0	0
2004	7	11	11	40	0	8.3	0	1.8	0	0
2004	7	11	12	0	0	8.2	0	1.9	0	0
2004	7	11	12	20	0	7.6	0	1.85	0	0
2004	7	11	12	40	0	7.9	0	1.8	0	0
2004	7	11	13	0	0	9.6	0	1.9	0	0
2004	7	11	13	20	0	9.6	0	1.7	0	0
2004	7	11	13	40	0	9.7	0	1.7	0	0
2004	7	11	14	0	0	9.7	0	2	0	0
2004	7	11	14	20	0	9.8	0	2	0	0
2004	7	11	14	40	0	10.8	0	1.8	0	0
2004	7	11	15	0	0	9.7	0	1.8	0	0
2004	7	11	15	20	0	8.4	0	1.9	0	0
2004	7	11	15	40	0	9.5	0	2.2	0	0
2004	7	11	16	0	0	8.6	0	1.9	0	0
2004	7	11	16	20	0	9.9	0	1.8	0	0
2004	7	11	16	40	0	9.2	0	2	0	0
2004	7	11	17	0	0	10.5	0	2	0	0
2004	7	11	17	20	0	10.2	0	1.8	0	0
2004	7	11	17	40	0	10.5	0	2.1	0	0
2004	7	11	18	0	0	10.4	0	2	0	0
2004	7	11	18	20	0	9.9	0	1.9	0	0
2004	7	11	18	40	0	11	0	1.7	0	0
2004	7	11	19	0	0	10.5	0	1.9	0	0
2004	7	11	19	20	0	10.3	0	2	0	0
2004	7	11	19	40	0	10.9	0	1.7	0	0
2004	7	11	20	0	0	11.6	0	1.9	0	0
2004	7	11	20	20	0	10.2	0	1.8	0	0
2004	7	11	20	40	0	10.7	0	2	0	0
2004	7	11	21	0	0	10.8	0	2	0	0
2004	7	11	21	20	0	10.1	0	1.9	0	0
2004	7	11	21	40	0	10	0	1.9	0	0
2004	7	11	22	0	0	10.3	0	1.9	0	0
2004	7	11	22	20	0	10.6	0	1.9	0	0
2004	7	11	22	40	0	10.1	0	2	0	0
2004	7	11	23	0	0	10.2	0	2.1	0	0
2004	7	11	23	20	0	8.8	0	2.3	0	0
2004	7	11	23	40	0	11	0	2.3	0	0
2004	7	12	0	0	0	12	0	2.2	0	0
2004	7	12	0	20	0	12	0	2.2	0	0
2004	7	12	0	40	0	12	0	2.1	0	0
2004	7	12	1	0	0	12.8	0	2.3	0	0
2004	7	12	1	20	0	11.3	0	2	0	0
2004	7	12	1	40	0	10.3	0	2.2	0	0
2004	7	12	2	0	0	10.1	0	2.2	0	0
2004	7	12	2	20	0	10.5	0	2.2	0	0
2004	7	12	2	40	0	10.7	0	2.2	0	0
2004	7	12	3	0	0	10.8	0	2.4	0	0
2004	7	12	3	20	0	10.6	0	2	0	0
2004	7	12	3	40	0	10	0	2.2	0	0
2004	7	12	4	0	0	9.7	0	2.2	0	0
2004	7	12	4	20	0	10.1	0	2.1	0	0
2004	7	12	4	40	0	9.2	0	2.3	0	0
2004	7	12	5	0	0	10.5	0	2	0	0
2004	7	12	5	20	0	9.5	0	2.1	0	0
2004	7	12	5	40	0	9.5	0	2.2	0	0
2004	7	12	6	0	0	9.4	0	1.9	0	0
2004	7	12	6	20	0	10.4	0	2.2	0	0
2004	7	12	6	40	0	10.2	0	2.1	0	0
2004	7	12	7	0	0	10.2	0	2	0	0
2004	7	12	7	20	0	9	0	2.2	0	0
2004	7	12	7	40	0	9.8	0	1.8	0	0
2004	7	12	8	0	0	10.7	0	1.9	0	0
2004	7	12	8	20	0	10.4	0	2.1	0	0
2004	7	12	8	40	0	10.5	0	2.1	0	0
2004	7	12	9	0	0	9.9	0	2	0	0
2004	7	12	9	20	0	10.6	0	2.1	0	0
2004	7	12	9	40	0	10.6	0	2	0	0
2004	7	12	10	0	0	9.4	0	1.9	0	0
2004	7	12	10	20	0	11	0	2.1	0	0
2004	7	12	10	40	0	9.8	0	1.9	0	0
2004	7	12	11	0	0	9.5	0	1.9	0	0
2004	7	12	11	20	0	9.9	0	2	0	0
2004	7	12	11	40	0	9.3	0	2.1	0	0
2004	7	12	12	0	0	9.2	0	2.2	0	0
2004	7	12	12	20	0	10.1	0	1.8	0	0
2004	7	12	12	40	0	10	0	1.8	0	0
2004	7	12	13	0	0	9.8	0	1.9	0	0
2004	7	12	13	20	0	9.6	0	2.1	0	0
2004	7	12	13	40	0	9.9	0	1.9	0	0
2004	7	12	14	0	0	9.9	0	1.9	0	0
2004	7	12	14	20	0	10.4	0	2	0	0
2004	7	12	14	40	0	9.8	0	2.3	0	0
2004	7	12	15	0	0	10.3	0	2	0	0
2004	7	12	15	20	0	8.6	0	2.1	0	0
2004	7	12	15	40	0	10	0	2	0	0
2004	7	12	16	0	0	10	0	2	0	0
2004	7	12	16	20	0	9.5	0	2	0	0
2004	7	12	16	40	0	10.6	0	1.7	0	0
2004	7	12	17	0	0	10.2	0	1.8	0	0
2004	7	12	17	20	0	9.9	0	1.9	0	0
2004	7	12	17	40	0	10.2	0	2	0	0
2004	7	12	18	0	0	9.9	0	1.8	0	0
2004	7	12	18	20	0	9.4	0	1.9	0	0
2004	7	12	18	40	0	8.9	0	1.6	0	0
2004	7	12	19	0	0	8.8	0	1.7	0	0
2004	7	12	19	20	0	8.6	0	1.5	0	0
2004	7	12	19	40	0	9	0	1.6	0	0
2004	7	12	20	0	0	9.1	0	1.7	0	0
2004	7	12	20	20	0	8.2	0	1.6	0	0
2004	7	12	20	40	0	10.5	0	1.7	0	0
2004	7	12	21	0	0	10.1	0	1.6	0	0
2004	7	12	21	20	0	11.1	0	1.5	0	0
2004	7	12	21	40	0	11.6	0	1.6	0	0
2004	7	12	22	0	0	11.3	0	1.7	0	0
2004	7	12	22	20	0	12	0	1.5	0	0
2004	7	12	22	40	0	11.6	0	1.8	0	0
2004	7	12	23	0	0	12.3	0	1.9	0	0
2004	7	12	23	20	0	10.6	0	1.9	0	0
2004	7	12	23	40	0	11.3	0	2	0	0
2004	7	13	0	0	0	10.3	0	1.9	0	0
2004	7	13	0	20	0	11	0	2	0	0
2004	7	13	0	40	0	10.8	0	2.2	0	0
2004	7	13	1	0	0	10.4	0	1.8	0	0
2004	7	13	1	20	0	10.8	0	1.9	0	0
2004	7	13	1	40	0	10.8	0	1.9	0	0
2004	7	13	2	0	0	10.7	0	1.8	0	0
2004	7	13	2	20	0	11.5	0	1.9	0	0
2004	7	13	2	40	0	11.4	0	2.1	0	0
2004	7	13	3	0	0	12.9	0	1.9	0	0
2004	7	13	3	20	0	10.9	0	2.2	0	0
2004	7	13	3	40	0	12.3	0	2	0	0
2004	7	13	4	0	0	11	0	2.2	0	0
2004	7	13	4	20	0	11.8	0	2.2	0	0
2004	7	13	4	40	0	11.2	0	2.15	0	0
2004	7	13	5	0	0	11.7	0	2.1	0	0
2004	7	13	5	20	0	12	0	1.9	0	0
2004	7	13	5	40	0	11.6	0	2.3	0	0
2004	7	13	6	0	0	11.1	0	2.3	0	0
2004	7	13	6	20	0	10.6	0	2.1	0	0
2004	7	13	6	40	0	10.7	0	2.2	0	0
2004	7	13	7	0	0	10.7	0	2.1	0	0
2004	7	13	7	20	0	9.8	0	2	0	0
2004	7	13	7	40	0	10.3	0	2	0	0
2004	7	13	8	0	0	9.6	0	1.9	0	0
2004	7	13	8	20	0	9.7	0	1.8	0	0
2004	7	13	8	40	0	10.2	0	2	0	0
2004	7	13	9	0	0	8.5	0	1.9	0	0
2004	7	13	9	20	0	7.1	0	2.2	0	0
2004	7	13	9	40	0	7.7	0	1.9	0	0
2004	7	13	10	0	0	8.9	0	2.1	0	0
2004	7	13	10	20	0	8.5	0	1.8	0	0
2004	7	13	10	40	0	7.4	0	2	0	0
2004	7	13	11	0	0	7.8	0	1.8	0	0
2004	7	13	11	20	0	7.6	0	2	0	0
2004	7	13	11	40	0	7.7	0	1.9	0	0
2004	7	13	12	0	0	7.1	0	1.9	0	0
2004	7	13	12	20	0	7.1	0	1.7	0	0
2004	7	13	12	40	0	7.2	0	1.7	0	0
2004	7	13	13	0	0	7.2	0	1.8	0	0
2004	7	13	13	20	0	7.2	0	1.5	0	0
2004	7	13	13	40	0	6	0	1.5	0	0
2004	7	13	14	0	0	5.1	0	1.5	0	0
2004	7	13	14	20	0	4.6	0	1.6	0	0
2004	7	13	14	40	0	3.9	0	1.4	0	0
2004	7	13	15	0	0	3.4	0	1.4	0	0
2004	7	13	15	20	0	3.6	0	1.3	0	0
2004	7	13	15	40	0	3	0	1.3	0	0
2004	7	13	16	0	0	3.9	0	1.3	0	0
2004	7	13	16	20	0	4.4	0	1.2	0	0
2004	7	13	16	40	0	5.3	0	1.2	0	0
2004	7	13	17	0	0	5.9	0	1.1	0	0
2004	7	13	17	20	0	5.4	0	1	0	0
2004	7	13	17	40	0	5.9	0	1.1	0	0
2004	7	13	18	0	0	6.5	0	1.2	0	0
2004	7	13	18	20	0	6.1	0	1.1	0	0
2004	7	13	18	40	0	6.6	0	1.1	0	0
2004	7	13	19	0	0	6.3	0	1.1	0	0
2004	7	13	19	20	0	6.6	0	1.1	0	0
2004	7	13	19	40	0	6.6	0	1.2	0	0
2004	7	13	20	0	0	8	0	1.15	0	0
2004	7	13	20	20	0	7.8	0	1.1	0	0
2004	7	13	20	40	0	7.6	0	1.2	0	0
2004	7	13	21	0	0	7	0	1.1	0	0
2004	7	13	21	20	0	7.3	0	1.2	0	0
2004	7	13	21	40	0	7.4	0	1.2	0	0
2004	7	13	22	0	0	7.3	0	1.1	0	0
2004	7	13	22	20	0	7.5	0	1.2	0	0
2004	7	13	22	40	0	6.7	0	1.2	0	0
2004	7	13	23	0	0	6.2	0	1.2	0	0
2004	7	13	23	20	0	6.2	0	1.2	0	0
2004	7	13	23	40	0	5.8	0	1.2	0	0
2004	7	14	0	0	0	6.2	0	1.1	0	0
2004	7	14	0	20	0	5.8	0	1	0	0
2004	7	14	0	40	0	5	0	1.1	0	0
2004	7	14	1	0	0	5.1	0	1	0	0
2004	7	14	1	20	0	4	0	1.1	0	0
2004	7	14	1	40	0	3.4	0	1	0	0
2004	7	14	2	0	0	3.6	0	1.1	0	0
2004	7	14	2	20	0	3.8	0	1	0	0
2004	7	14	2	40	0	4	0	0.9	0	0
2004	7	14	3	0	0	4.4	0	1	0	0
2004	7	14	3	20	0	4.7	0	1.1	0	0
2004	7	14	3	40	0	6.3	0	1	0	0
2004	7	14	4	0	0	6.8	0	1.1	0	0
2004	7	14	4	20	0	6.6	0	1	0	0
2004	7	14	4	40	0	6.4	0	1	0	0
2004	7	14	5	0	0	5.7	0	1.1	0	0
2004	7	14	5	20	0	7	0	1.2	0	0
2004	7	14	5	40	0	6.2	0	1.1	0	0
2004	7	14	6	0	0	3.4	0	1.1	0	0
2004	7	14	6	20	0	5.2	0	1.2	0	0
2004	7	14	6	40	0	4.2	0	1.1	0	0
2004	7	14	7	0	0	4	0	1.1	0	0
2004	7	14	7	20	0	3.8	0	1.1	0	0
2004	7	14	7	40	0	3.4	0	1.1	0	0
2004	7	14	8	0	0	3.3	0	1.1	0	0
2004	7	14	8	20	0	3.2	0	1.1	0	0
2004	7	14	8	40	0	2.9	0	1.1	0	0
2004	7	14	9	0	0	1.8	0	1	0	0
2004	7	14	9	20	0	1.1	0	1	0	0
2004	7	14	9	40	0	1.2	0	1	0	0
2004	7	14	10	0	0	0.8	0	0.9	0	0
2004	7	14	10	20	0	0.5	0	0.9	0	0
2004	7	14	10	40	0	0.5	0	1	0	0
2004	7	14	11	0	0	0.5	0	1	0	0
2004	7	14	11	20	0	0.5	0	0.9	0	0
2004	7	14	11	40	0	0.7	0	0.9	0	0
2004	7	14	12	0	0	0.9	0	1	0	0
2004	7	14	12	20	0	0.8	0	1	0	0
2004	7	14	12	40	0	0.8	0	0.9	0	0
2004	7	14	13	0	0	1.4	0	0.9	0	0
2004	7	14	13	20	0	1.7	0	0.9	0	0
2004	7	14	13	40	0	0.8	0	0.9	0	0
2004	7	14	14	0	0	0.4	0	0.9	0	0
2004	7	14	14	20	0	0.5	0	0.9	0	0
2004	7	14	14	40	0	0.8	0	1	0	0
2004	7	14	15	0	0	0.8	0	0.9	0	0
2004	7	14	15	20	0	0.8	0	0.9	0	0
2004	7	14	15	40	0	0.9	0	0.9	0	0
2004	7	14	16	0	0	1.1	0	0.9	0	0
2004	7	14	16	20	0	1	0	0.8	0	0
2004	7	14	16	40	0	1.4	0	0.8	0	0
2004	7	14	17	0	0	1.7	0	0.8	0	0
2004	7	14	17	20	0	2.6	0	0.9	0	0
2004	7	14	17	40	0	2.7	0	0.9	0	0
2004	7	14	18	0	0	3	0	1	0	0
2004	7	14	18	20	0	2.8	0	0.9	0	0
2004	7	14	18	40	0	3	0	0.9	0	0
2004	7	14	19	0	0	3.5	0	0.9	0	0
2004	7	14	19	20	0	3.4	0	1	0	0
2004	7	14	19	40	0	2.6	0	1	0	0
2004	7	14	20	0	0	2.4	0	0.9	0	0
2004	7	14	20	20	0	1.9	0	0.9	0	0
2004	7	14	20	40	0	1.9	0	0.9	0	0
2004	7	14	21	0	0	1.9	0	0.9	0	0
2004	7	14	21	20	0	1.9	0	0.9	0	0
2004	7	14	21	40	0	2	0	0.8	0	0
2004	7	14	22	0	0	2.2	0	0.8	0	0
2004	7	14	22	20	0	2.2	0	0.7	0	0
2004	7	14	22	40	0	2.7	0	0.7	0	0
2004	7	14	23	0	0	3	0	0.8	0	0
2004	7	14	23	20	0	3.1	0	0.8	0	0
2004	7	14	23	40	0	2.4	0	0.7	0	0
2004	7	15	0	0	0	2.3	0	0.9	0	0
2004	7	15	0	20	0	1.8	0	0.8	0	0
2004	7	15	0	40	0	1.5	0	0.8	0	0
2004	7	15	1	0	0	2	0	0.6	0	0
2004	7	15	1	20	0	2.5	0	0.9	0	0
2004	7	15	1	40	0	2.8	0	0.8	0	0
2004	7	15	2	0	0	2.7	0	0.9	0	0
2004	7	15	2	20	0	3.3	0	0.8	0	0
2004	7	15	2	40	0	3.3	0	0.8	0	0
2004	7	15	3	0	0	3.3	0	0.8	0	0
2004	7	15	3	20	0	3.3	0	0.8	0	0
2004	7	15	3	40	0	3.6	0	1	0	0
2004	7	15	4	0	0	3.9	0	0.8	0	0
2004	7	15	4	20	0	4.9	0	0.9	0	0
2004	7	15	4	40	0	8.3	0	0.7	0	0
2004	7	15	5	0	0	9.4	0	0.8	0	0
2004	7	15	5	20	0	9	0	0.8	0	0
2004	7	15	5	40	0	9.5	0	0.9	0	0
2004	7	15	6	0	0	9.5	0	0.9	0	0
2004	7	15	6	20	0	9.7	0	1.1	0	0
2004	7	15	6	40	0	9.3	0	1.2	0	0
2004	7	15	7	0	0	10.3	0	1.4	0	0
2004	7	15	7	20	0	9.9	0	1.45	0	0
2004	7	15	7	40	0	10.3	0	1.5	0	0
2004	7	15	8	0	0	10.8	0	1.5	0	0
2004	7	15	8	20	0	11.3	0	1.6	0	0
2004	7	15	8	40	0	11.3	0	1.5	0	0
2004	7	15	9	0	0	11.1	0	1.6	0	0
2004	7	15	9	20	0	10.5	0	1.7	0	0
2004	7	15	9	40	0	11.3	0	1.7	0	0
2004	7	15	10	0	0	11.5	0	1.7	0	0
2004	7	15	10	20	0	12	0	1.5	0	0
2004	7	15	10	40	0	11.5	0	1.9	0	0
2004	7	15	11	0	0	11.6	0	1.8	0	0
2004	7	15	11	20	0	11.9	0	1.9	0	0
2004	7	15	11	40	0	11.7	0	1.9	0	0
2004	7	15	12	0	0	11.1	0	1.8	0	0
2004	7	15	12	20	0	10.6	0	1.8	0	0
2004	7	15	12	40	0	10.2	0	1.8	0	0
2004	7	15	13	0	0	10.4	0	2	0	0
2004	7	15	13	20	0	10.1	0	2.1	0	0
2004	7	15	13	40	0	10	0	1.8	0	0
2004	7	15	14	0	0	9.4	0	1.7	0	0
2004	7	15	14	20	0	9	0	1.75	0	0
2004	7	15	14	40	0	8.8	0	1.8	0	0
2004	7	15	15	0	0	8.1	0	1.8	0	0
2004	7	15	15	20	0	8.1	0	1.7	0	0
2004	7	15	15	40	0	7.8	0	1.6	0	0
2004	7	15	16	0	0	7.8	0	1.5	0	0
2004	7	15	16	20	0	7.3	0	1.5	0	0
2004	7	15	16	40	0	7.5	0	1.4	0	0
2004	7	15	17	0	0	6.8	0	1.5	0	0
2004	7	15	17	20	0	6.9	0	1.4	0	0
2004	7	15	17	40	0	6.5	0	1.5	0	0
2004	7	15	18	0	0	6.6	0	1.5	0	0
2004	7	15	18	20	0	6.7	0	1.5	0	0
2004	7	15	18	40	0	6.7	0	1.6	0	0
2004	7	15	19	0	0	6.4	0	1.5	0	0
2004	7	15	19	20	0	6.6	0	1.4	0	0
2004	7	15	19	40	0	6.3	0	1.4	0	0
2004	7	15	20	0	0	6.1	0	1.5	0	0
2004	7	15	20	20	0	5.9	0	1.4	0	0
2004	7	15	20	40	0	6	0	1.4	0	0
2004	7	15	21	0	0	5.9	0	1.35	0	0
2004	7	15	21	20	0	6.4	0	1.3	0	0
2004	7	15	21	40	0	6.3	0	1.1	0	0
2004	7	15	22	0	0	5.8	0	1.2	0	0
2004	7	15	22	20	0	5.6	0	1.2	0	0
2004	7	15	22	40	0	6.1	0	1.2	0	0
2004	7	15	23	0	0	6	0	1.2	0	0
2004	7	15	23	20	0	5.9	0	1.1	0	0
2004	7	15	23	40	0	6.4	0	1.1	0	0
2004	7	16	0	0	0	6.6	0	1.1	0	0
2004	7	16	0	20	0	6.7	0	1.1	0	0
2004	7	16	0	40	0	6.9	0	1.1	0	0
2004	7	16	1	0	0	6.5	0	1	0	0
2004	7	16	1	20	0	5.2	0	1.1	0	0
2004	7	16	1	40	0	5.7	0	1.1	0	0
2004	7	16	2	0	0	5.4	0	1.1	0	0
2004	7	16	2	20	0	4.7	0	1	0	0
2004	7	16	2	40	0	5.4	0	1	0	0
2004	7	16	3	0	0	5.1	0	1	0	0
2004	7	16	3	20	0	4.6	0	1.1	0	0
2004	7	16	3	40	0	4.3	0	0.9	0	0
2004	7	16	4	0	0	3.3	0	1	0	0
2004	7	16	4	20	0	3.8	0	1	0	0
2004	7	16	4	40	0	3.2	0	1	0	0
2004	7	16	5	0	0	2.3	0	1.1	0	0
2004	7	16	5	20	0	3.1	0	1.1	0	0
2004	7	16	5	40	0	3.4	0	1.1	0	0
2004	7	16	6	0	0	3.3	0	1	0	0
2004	7	16	6	20	0	3.3	0	1	0	0
2004	7	16	6	40	0	2.9	0	1	0	0
2004	7	16	7	0	0	3.2	0	1.1	0	0
2004	7	16	7	20	0	3.2	0	1.05	0	0
2004	7	16	7	40	0	3.1	0	1	0	0
2004	7	16	8	0	0	2.9	0	1.1	0	0
2004	7	16	8	20	0	3.5	0	0.9	0	0
2004	7	16	8	40	0	3.5	0	0.9	0	0
2004	7	16	9	0	0	3.7	0	1	0	0
2004	7	16	9	20	0	3.8	0	1	0	0
2004	7	16	9	40	0	4.4	0	1	0	0
2004	7	16	10	0	0	4.5	0	1	0	0
2004	7	16	10	20	0	4.6	0	1	0	0
2004	7	16	10	40	0	4.9	0	1.1	0	0
2004	7	16	11	0	0	4.9	0	1.1	0	0
2004	7	16	11	20	0	4.6	0	1	0	0
2004	7	16	11	40	0	4.8	0	1	0	0
2004	7	16	12	0	0	4.5	0	0.9	0	0
2004	7	16	12	20	0	4.8	0	1	0	0
2004	7	16	12	40	0	4.8	0	0.9	0	0
2004	7	16	13	0	0	5	0	1	0	0
2004	7	16	13	20	0	4.4	0	0.9	0	0
2004	7	16	13	40	0	4.8	0	1	0	0
2004	7	16	14	0	0	6	0	0.9	0	0
2004	7	16	14	20	0	5.5	0	0.9	0	0
2004	7	16	14	40	0	5	0	1	0	0
2004	7	16	15	0	0	5	0	1	0	0
2004	7	16	15	20	0	5.1	0	0.95	0	0
2004	7	16	15	40	0	5.1	0	0.9	0	0
2004	7	16	16	0	0	5.2	0	1	0	0
2004	7	16	16	20	0	5.7	0	1	0	0
2004	7	16	16	40	0	5.8	0	1	0	0
2004	7	16	17	0	0	5.7	0	1	0	0
2004	7	16	17	20	0	6.2	0	0.9	0	0
2004	7	16	17	40	0	6.6	0	0.9	0	0
2004	7	16	18	0	0	6.9	0	1	0	0
2004	7	16	18	20	0	5.8	0	1.1	0	0
2004	7	16	18	40	0	4.6	0	1	0	0
2004	7	16	19	0	0	4.9	0	1	0	0
2004	7	16	19	20	0	2.2	0	1	0	0
2004	7	16	19	40	0	2.2	0	1.1	0	0
2004	7	16	20	0	0	2.4	0	1	0	0
2004	7	16	20	20	0	7.1	0	1.1	0	0
2004	7	16	20	40	0	6.3	0	1	0	0
2004	7	16	21	0	0	6.3	0	1.1	0	0
2004	7	16	21	20	0	6.6	0	0.9	0	0
2004	7	16	21	40	0	5.7	0	0.9	0	0
2004	7	16	22	0	0	5.3	0	0.8	0	0
2004	7	16	22	20	0	6	0	1	0	0
2004	7	16	22	40	0	6.1	0	0.9	0	0
2004	7	16	23	0	0	5.4	0	0.9	0	0
2004	7	16	23	20	0	5.5	0	0.8	0	0
2004	7	16	23	40	0	5.3	0	1	0	0
2004	7	17	0	0	0	6	0	1	0	0
2004	7	17	0	20	0	5.9	0	0.9	0	0
2004	7	17	0	40	0	6.1	0	0.9	0	0
2004	7	17	1	0	0	4.9	0	0.9	0	0
2004	7	17	1	20	0	5.5	0	0.9	0	0
2004	7	17	1	40	0	5.1	0	0.9	0	0
2004	7	17	2	0	0	4.6	0	0.9	0	0
2004	7	17	2	20	0	4.5	0	0.9	0	0
2004	7	17	2	40	0	4	0	0.9	0	0
2004	7	17	3	0	0	4	0	0.9	0	0
2004	7	17	3	20	0	4.2	0	0.8	0	0
2004	7	17	3	40	0	3.2	0	0.9	0	0
2004	7	17	4	0	0	3.6	0	0.9	0	0
2004	7	17	4	20	0	3.6	0	0.9	0	0
2004	7	17	4	40	0	4.3	0	0.9	0	0
2004	7	17	5	0	0	4.1	0	0.8	0	0
2004	7	17	5	20	0	4.6	0	0.9	0	0
2004	7	17	5	40	0	5.5	0	0.9	0	0
2004	7	17	6	0	0	5.1	0	0.9	0	0
2004	7	17	6	20	0	5.3	0	0.9	0	0
2004	7	17	6	40	0	6	0	0.9	0	0
2004	7	17	7	0	0	5.3	0	1	0	0
2004	7	17	7	20	0	6.4	0	0.9	0	0
2004	7	17	7	40	0	5.4	0	1	0	0
2004	7	17	8	0	0	6	0	1	0	0
2004	7	17	8	20	0	5.6	0	0.9	0	0
2004	7	17	8	40	0	6.5	0	0.9	0	0
2004	7	17	9	0	0	5.9	0	0.9	0	0
2004	7	17	9	20	0	7	0	0.9	0	0
2004	7	17	9	40	0	7.4	0	0.9	0	0
2004	7	17	10	0	0	6.9	0	1	0	0
2004	7	17	10	20	0	6.3	0	0.9	0	0
2004	7	17	10	40	0	7.1	0	0.9	0	0
2004	7	17	11	0	0	7.2	0	0.9	0	0
2004	7	17	11	20	0	6.8	0	1	0	0
2004	7	17	11	40	0	7.1	0	1	0	0
2004	7	17	12	0	0	6.4	0	1.1	0	0
2004	7	17	12	20	0	6.2	0	1	0	0
2004	7	17	12	40	0	4.9	0	1.0333	0	0
2004	7	17	13	0	0	4.5	0	1.0667	0	0
2004	7	17	13	20	0	3.5	0	1.1	0	0
2004	7	17	13	40	0	1.4	0	1	0	0
2004	7	17	14	0	0	1.9	0	1.1	0	0
2004	7	17	14	20	0	4.9	0	0.8	0	0
2004	7	17	14	40	0	9.1	0	1	0	0
2004	7	17	15	0	0	8.4	0	1	0	0
2004	7	17	15	20	0	5.1	0	1	0	0
2004	7	17	15	40	0	3.2	0	0.9	0	0
2004	7	17	16	0	0	1.5	0	0.9	0	0
2004	7	17	16	20	0	0.9	0	1	0	0
2004	7	17	16	40	0	1.4	0	1	0	0
2004	7	17	17	0	0	1.7	0	1	0	0
2004	7	17	17	20	0	1.2	0	0.9	0	0
2004	7	17	17	40	0	1.7	0	0.9	0	0
2004	7	17	18	0	0	3.2	0	0.9	0	0
2004	7	17	18	20	0	3.1	0	0.9	0	0
2004	7	17	18	40	0	3	0	1.1	0	0
2004	7	17	19	0	0	2	0	1	0	0
2004	7	17	19	20	0	2.3	0	1.1	0	0
2004	7	17	19	40	0	1.9	0	1	0	0
2004	7	17	20	0	0	1.6	0	1	0	0
2004	7	17	20	20	0	1.5	0	1	0	0
2004	7	17	20	40	0	1.5	0	1.2	0	0
2004	7	17	21	0	0	0.9	0	1.3	0	0
2004	7	17	21	20	0	0.8	0	1.4	0	0
2004	7	17	21	40	0	0.9	0	1.4	0	0
2004	7	17	22	0	0	0.5	0	1.5	0	0
2004	7	17	22	20	0	1	0	1.4	0	0
2004	7	17	22	40	0	1.5	0	1.5	0	0
2004	7	17	23	0	0	1.7	0	1.5	0	0
2004	7	17	23	20	0	2.2	0	1.5	0	0
2004	7	17	23	40	0	2.6	0	1.4	0	0
2004	7	18	0	0	0	3.3	0	1.4	0	0
2004	7	18	0	20	0	4.1	0	1.6	0	0
2004	7	18	0	40	0	3.7	0	1.3	0	0
2004	7	18	1	0	0	3.9	0	1.4	0	0
2004	7	18	1	20	0	4.4	0	1.3	0	0
2004	7	18	1	40	0	4.4	0	1.4	0	0
2004	7	18	2	0	0	4.3	0	1.4	0	0
2004	7	18	2	20	0	4.8	0	1.2	0	0
2004	7	18	2	40	0	5.1	0	1.3	0	0
2004	7	18	3	0	0	6.1	0	1.1	0	0
2004	7	18	3	20	0	6.1	0	1.2	0	0
2004	7	18	3	40	0	6.2	0	1.2	0	0
2004	7	18	4	0	0	6.3	0	1.4	0	0
2004	7	18	4	20	0	6	0	1.4	0	0
2004	7	18	4	40	0	5.2	0	1.1	0	0
2004	7	18	5	0	0	5.7	0	1.1	0	0
2004	7	18	5	20	0	5.7	0	1.2	0	0
2004	7	18	5	40	0	5.1	0	1.3	0	0
2004	7	18	6	0	0	4.8	0	1.2	0	0
2004	7	18	6	20	0	4.9	0	1.2	0	0
2004	7	18	6	40	0	4.9	0	1	0	0
2004	7	18	7	0	0	4.8	0	1	0	0
2004	7	18	7	20	0	4.7	0	1.1	0	0
2004	7	18	7	40	0	4.6	0	1.1	0	0
2004	7	18	8	0	0	5	0	1	0	0
2004	7	18	8	20	0	4.9	0	1	0	0
2004	7	18	8	40	0	5	0	1	0	0
2004	7	18	9	0	0	4.9	0	1.1	0	0
2004	7	18	9	20	0	5.1	0	1	0	0
2004	7	18	9	40	0	5.1	0	1	0	0
2004	7	18	10	0	0	4.9	0	0.9	0	0
2004	7	18	10	20	0	4.5	0	0.9	0	0
2004	7	18	10	40	0	4.9	0	0.9	0	0
2004	7	18	11	0	0	4.5	0	0.9	0	0
2004	7	18	11	20	0	4.5	0	0.8	0	0
2004	7	18	11	40	0	4.2	0	0.8	0	0
2004	7	18	12	0	0	3.7	0	0.9	0	0
2004	7	18	12	20	0	3.8	0	0.9	0	0
2004	7	18	12	40	0	3.9	0	0.9	0	0
2004	7	18	13	0	0	4	0	0.8	0	0
2004	7	18	13	20	0	5.1	0	0.8	0	0
2004	7	18	13	40	0	6.5	0	0.8	0	0
2004	7	18	14	0	0	6.6	0	0.7	0	0
2004	7	18	14	20	0	6.4	0	0.8	0	0
2004	7	18	14	40	0	6.2	0	0.9	0	0
2004	7	18	15	0	0	7.2	0	0.9	0	0
2004	7	18	15	20	0	7.3	0	0.9	0	0
2004	7	18	15	40	0	7.6	0	0.9	0	0
2004	7	18	16	0	0	8.2	0	0.9	0	0
2004	7	18	16	20	0	8	0	0.9	0	0
2004	7	18	16	40	0	7.8	0	0.9	0	0
2004	7	18	17	0	0	7.3	0	0.8	0	0
2004	7	18	17	20	0	7.2	0	0.9	0	0
2004	7	18	17	40	0	7.1	0	0.9	0	0
2004	7	18	18	0	0	6.7	0	1	0	0
2004	7	18	18	20	0	6.8	0	0.9	0	0
2004	7	18	18	40	0	6.9	0	0.9	0	0
2004	7	18	19	0	0	7.1	0	0.9	0	0
2004	7	18	19	20	0	7.1	0	0.9	0	0
2004	7	18	19	40	0	7.7	0	0.9	0	0
2004	7	18	20	0	0	7.5	0	1	0	0
2004	7	18	20	20	0	7	0	1	0	0
2004	7	18	20	40	0	6.6	0	1	0	0
2004	7	18	21	0	0	6.6	0	1.2	0	0
2004	7	18	21	20	0	7.1	0	1	0	0
2004	7	18	21	40	0	6.9	0	1.1	0	0
2004	7	18	22	0	0	7.4	0	1	0	0
2004	7	18	22	20	0	7.6	0	1.1	0	0
2004	7	18	22	40	0	7.5	0	1.1	0	0
2004	7	18	23	0	0	7.6	0	1.1	0	0
2004	7	18	23	20	0	7.4	0	1.2	0	0
2004	7	18	23	40	0	7.6	0	1.1	0	0
2004	7	19	0	0	0	7.4	0	1.1	0	0
2004	7	19	0	20	0	7.1	0	1.1	0	0
2004	7	19	0	40	0	7	0	1.2	0	0
2004	7	19	1	0	0	6.8	0	1.2	0	0
2004	7	19	1	20	0	6.9	0	1.1	0	0
2004	7	19	1	40	0	6.6	0	1.2	0	0
2004	7	19	2	0	0	6.4	0	1.2	0	0
[truncated: 129,472 more rows]
